# Supplementary material for: A new MCM-41 supported HPF6 catalyst for the library synthesis of highly substituted 1,4-dihydropyridines and oxidation to pyridines: report of one-dimensional packing towards LMSOMs and studies on their photophysical properties
Source: Royal Society of Chemistry journal article supplement (doi:10.1039/c3gc40441b), 2013-01-01

## Supporting Information 2

# A new MCM-41 supported HPF<sub>6</sub> catalyst for the library synthesis of highly substituted 1,4-dihydropyridines and oxidation to pyridines: report of one-dimensional packing towards LMSOMs and studies on their photophysical properties

Suman Ray<sup>a</sup>, Mike Brown<sup>b</sup>, Asim Bhaumik<sup>c</sup>, Arghya Dutta<sup>c</sup> and Chhanda

Mukhopadhyay<sup>a\*</sup>

*a: Department of Chemistry, University of Calcutta, 92 APC Road, Kolkata-700009, India*

*b: Bruker Bio Spin, 2700 Technology Forest Drive, Woodlands, Texas 77381, USA*

*c: Department of Materials Science, Indian Association for the Cultivation of Science, Jadavpur, Kolkata 700 032, India.*

[cmukhop@yahoo.co.in](mailto:cmukhop@yahoo.co.in)

### Table of Contents

|                                                                           |       |
|---------------------------------------------------------------------------|-------|
| General synthetic procedure for the preparation of <b>6a-6s</b> .....     | 2     |
| Spectroscopic characterization for <b>6a-6s</b> .....                     | 3-11  |
| <sup>1</sup> H NMR and <sup>13</sup> C NMR spectra for <b>6a-6s</b> ..... | 12-29 |

### **General synthetic procedure for the preparation of 6a-6s**

All the reactions were carried out in a round bottom flask equipped with a magnetic stirrer. In a typical reaction a solution of ketone (1 mmol), 1,3-diketoneone (1 mmol), aldehyde (1 mmol), and ammonium carbonate (1.2 mmol) in water (2 ml) were stirred at room temperature till completion using 2 mmol 30% aqueous H<sub>2</sub>O<sub>2</sub> in presence of 40 mg of silica-HPF<sub>6</sub> catalyst. The completion of the reaction was indicated by the disappearance of the starting material in thin layer chromatography. After completion of the reaction the crude product was taken in dichloromethane and filtered to separate the products as filtrate from the catalyst (residue). The solvent was evaporated in rotary evaporator and the crude product was further purified by silica gel column chromatography (15% ethyl acetate/85% petroleum ether). The products were characterized by IR, <sup>1</sup>H NMR, <sup>13</sup>C NMR, CHN and X-ray single crystal analysis. The spectral and analytical data of all the novel fully oxidized pyridine compounds are given below.

### Spectroscopic characterization for 6a-6s

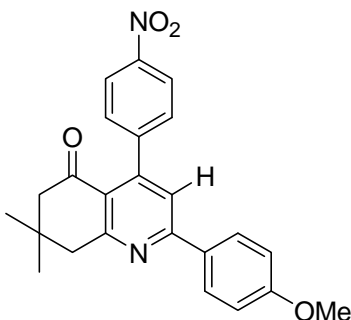

#### 7,8-dihydro-2-(4-methoxyphenyl)-7,7-dimethyl-4-(4-nitrophenyl)quinolin-5(6H)-one (6a):

White solid, mp 182-184 °C (CH<sub>2</sub>Cl<sub>2</sub> + EtOAc, equal volumes); IR  $\nu_{\max}$  (KBr) 3430, 3050, 2957, 2872, 1686, 1573, and 1530 cm<sup>-1</sup>; <sup>1</sup>H NMR (300 MHz, CDCl<sub>3</sub>)  $\delta$ : 8.22 (2H, d, J = 8.7 Hz), 8.01 (2H, d, J = 8.7 Hz), 7.36-7.34 (3H, m), 6.95 (2H, d, J = 9.0 Hz), 3.81 (3H, s), 3.18 (2H, s), 2.47 (2H, s), 1.10 (6H, s); <sup>13</sup>C NMR (75 MHz, CDCl<sub>3</sub>)  $\delta$ : 196.6, 163.2, 162.3, 158.7, 150.9, 147.5, 146.9, 129.7, 128.7, 123.3, 123.0, 120.9, 114.6, 55.5, 53.4, 46.5, 32.6, 28.2; Anal. Calcd for C<sub>24</sub>H<sub>22</sub>N<sub>2</sub>O<sub>4</sub>: C, 71.63; H, 5.51; N, 6.96. Found C, 71.92; H, 5.60; N, 7.01.

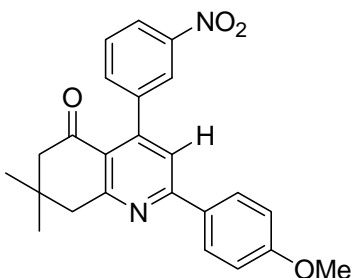

#### 7,8-dihydro-2-(4-methoxyphenyl)-7,7-dimethyl-4-(3-nitrophenyl)quinolin-5(6H)-one (6b):

White solid, mp 156-158 °C (CH<sub>2</sub>Cl<sub>2</sub> + EtOAc, equal volumes); IR  $\nu_{\max}$  (KBr) 3432, 3052, 2957, 2872, 1686, 1576, and 1535 cm<sup>-1</sup>; <sup>1</sup>H NMR (300 MHz, CDCl<sub>3</sub>)  $\delta$ : 8.17-8.03 (4H, m), 7.51 (2H, br s), 7.37 (1H, m), 6.92 (2H, br s), 3.83-3.75 (3H, m), 3.20 (2H, s), 2.46 (2H, s), 1.00 (6H, s); <sup>13</sup>C NMR (75 MHz, CDCl<sub>3</sub>)  $\delta$ : 197.3, 163.7, 162.0, 159.3, 149.8, 148.0, 142.1, 140.8, 134.3, 131.0, 129.4, 128.8, 124.6, 124.4, 122.9, 122.7, 122.0, 120.8, 114.5, 114.1, 55.6, 53.6, 47.4, 32.6, 28.3; Anal. Calcd for C<sub>24</sub>H<sub>22</sub>N<sub>2</sub>O<sub>4</sub>: C, 71.63; H, 5.51; N, 6.96. Found C, 71.82; H, 5.45; N, 6.78.

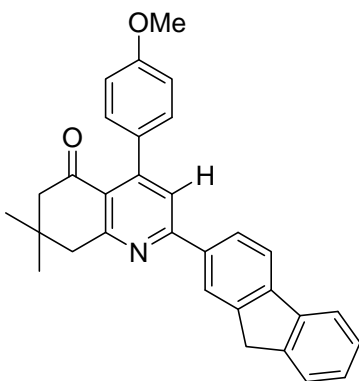

**2-(9H-fluoren-2-yl)-7,8-dihydro-4-(4-methoxyphenyl)-7,7-dimethylquinolin-5(6H)-one (6c):**

Yellowish white solid, mp 140-142 °C (CH<sub>2</sub>Cl<sub>2</sub> + EtOAc, equal volumes); IR  $\nu_{\max}$  (KBr) 3430, 3050, 2957, 2872, 1686, 1573, and 1530 cm<sup>-1</sup>; <sup>1</sup>H NMR (300 MHz, CDCl<sub>3</sub>)  $\delta$ : 8.29 (1H, s), 8.08 (1H, d, J = 7.8 Hz), 7.85 (2H, q, J = 8.1 Hz), 7.57-7.55 (2H, m), 7.53 (1H, s), 7.41-7.36 (2H, m), 7.26 (2H, d, J = 8.4 Hz), 6.96 (2H, d, J = 8.4 Hz), 3.96 (2H, s), 3.85 (3H, s), 3.19 (2H, s), 2.55 (2H, s), 1.16 (6H, br s); <sup>13</sup>C NMR (75 MHz, CDCl<sub>3</sub>)  $\delta$ : 197.8, 163.5, 159.6, 159.3, 152.2, 144.1, 143.9, 143.7, 141.1, 136.4, 132.5, 129.4, 127.4, 127.0, 126.5, 125.2, 124.2, 123.8, 122.0, 120.5, 120.2, 113.6, 55.3, 54.0, 47.7, 37.0, 32.6, 28.3; Anal. Calcd for C<sub>31</sub>H<sub>27</sub>NO<sub>2</sub>: C, 83.57; H, 6.11; N, 3.14. Found C, 83.26; H, 6.01; N, 3.34.

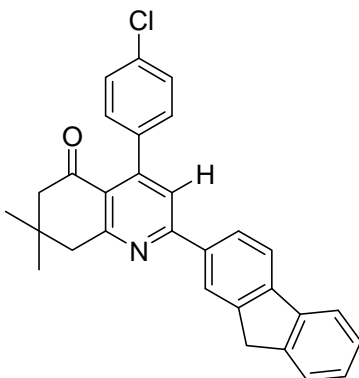

**4-(4-chlorophenyl)-2-(9H-fluoren-2-yl)-7,8-dihydro-7,7-dimethylquinolin-5(6H)-one (6d):**

Yellowish white solid, mp 180-182 °C (CH<sub>2</sub>Cl<sub>2</sub> + EtOAc, equal volumes); IR  $\nu_{\max}$  (KBr) 3424, 3050, 2957, 2872, 1686, 1573, and 1530 cm<sup>-1</sup>; <sup>1</sup>H NMR (300 MHz, CDCl<sub>3</sub>)  $\delta$ : 8.32 (1H, s), 8.10 (1H, d, J = 7.8 Hz), 7.85 (2H, t, J = 8.1 Hz), 7.58 (1H, d, J = 6.9 Hz), 7.53 (1H, s), 7.44-7.33 (4H, m), 7.25 (2H, dd, J = 6.6 Hz and J = 1.8 Hz), 3.98 (2H, s), 3.23 (2H, s), 2.56 (2H, s), 1.19 (6H, br s); <sup>13</sup>C NMR (75 MHz, CDCl<sub>3</sub>)  $\delta$ : 197.6, 163.6, 159.6, 150.9, 144.0, 143.9, 143.7, 140.9, 138.9, 136.3, 133.8, 129.2, 128.2, 127.4, 126.9,

126.4, 125.1, 124.0, 123.4, 121.4, 120.4, 120.1, 53.7, 47.7, 36.9, 32.5, 28.2; Anal. Calcd for  $C_{30}H_{24}ClNO$ :  
C, 80.08; H, 5.38; N, 3.11. Found C, 80.30; H, 5.38; N, 3.19.

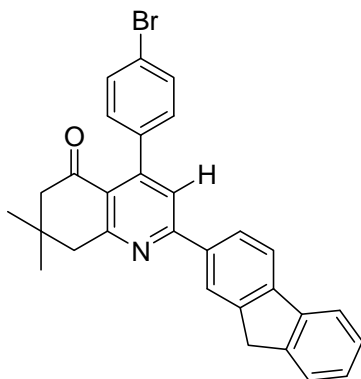

**4-(4-bromophenyl)-2-(9H-fluoren-2-yl)-7,8-dihydro-7,7-dimethylquinolin-5(6H)-one (6e):**

Yellowish white solid, mp 192-194 °C ( $CH_2Cl_2$  + EtOAc, equal volumes); IR  $\nu_{max}$  (KBr) 3424, 3051, 2954, 2872, 1689, 1573, and 1526  $cm^{-1}$ ;  $^1H$  NMR (300 MHz,  $CDCl_3$ )  $\delta$ : 8.30 (1H, s), 8.09 (1H, d,  $J = 7.8$  Hz), 7.86 (2H, t,  $J = 8.7$  Hz), 7.58 (1H, d,  $J = 7.2$  Hz), 7.53 (1H, s), 7.42-7.35 (4H, m), 7.23 (2H, d,  $J = 8.7$  Hz), 3.98 (2H, s), 3.22 (2H, s), 2.55 (2H, s), 1.17 (6H, br s);  $^{13}C$  NMR (75 MHz,  $CDCl_3$ )  $\delta$ : 197.4, 163.4, 159.4, 144.2, 144.0, 140.1, 138.7, 134.1, 129.3, 128.4, 127.6, 127.0, 126.8, 125.2, 124.5, 123.7, 122.1, 120.6, 120.3, 53.8, 47.3, 37.1, 32.7, 28.3; Anal. Calcd for  $C_{30}H_{24}BrNO$ : C, 72.88; H, 4.89; N, 2.83. Found C, 72.90; H, 4.98; N, 2.99.

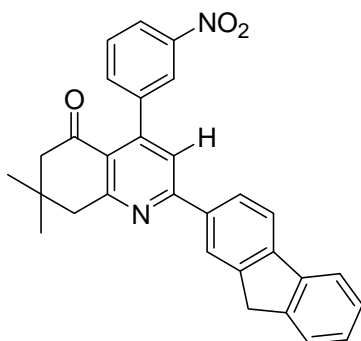

**2-(9H-fluoren-2-yl)-7,8-dihydro-7,7-dimethyl-4-(3-nitrophenyl)quinolin-5(6H)-one (6f):**

Yellowish white solid, mp 190-192 °C ( $CH_2Cl_2$  + EtOAc, equal volumes); IR  $\nu_{max}$  (KBr) 3432, 3059, 2946, 2872, 1680, 1574, 1524, and 1346  $cm^{-1}$ ;  $^1H$  NMR (300 MHz,  $CDCl_3$ )  $\delta$ : 8.32 (1H, s), 8.27 (1H, d,  $J = 8.1$  Hz), 8.10 (1H, d,  $J = 8.1$  Hz), 7.99 (1H, s), 7.85 (2H, t,  $J = 8.1$  Hz), 7.67-7.57 (3H, m), 7.53 (1H, s), 7.41-7.35 (2H, m), 4.03 (2H, s), 3.25 (2H, s), 2.56 (2H, s), 1.19 (6H, br s);  $^{13}C$  NMR (75 MHz,  $CDCl_3$ )  $\delta$ : 197.6, 164.0, 158.2, 149.5, 148.7, 144.0, 143.4, 142.7, 140.8, 135.4, 134.2, 133.7, 129.0, 127.3, 127.0, 125.1,

124.0, 122.8, 122.0, 121.2, 120.2, 53.5, 47.7, 37.1, 32.6, 28.2; Anal. Calcd for  $C_{30}H_{24}N_2O_3$ : C, 78.24; H, 5.25; N, 6.08. Found C, 78.24; H, 5.25; N, 6.08.

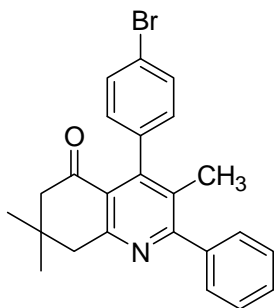

**4-(4-Bromo-phenyl)-3,7,7-trimethyl-2-phenyl-7,8-dihydro-6H-quinolin-5-one (6g):**

White solid, mp 142-144 °C ( $CH_2Cl_2$  + EtOAc, equal volumes); IR  $\nu_{max}$  (KBr) 3421, 3061, 2954, 2872, 1689, 1569, and 1525  $cm^{-1}$ ;  $^1H$  NMR (300 MHz,  $CDCl_3$ )  $\delta$ : 8.01-7.84 (7H, m), 7.40 (2H, d,  $J = 8.1$  Hz), 3.56 (2H, s), 2.89 (2H, s), 2.36 (3H, s), 1.55 (6H, s);  $^{13}C$  NMR (75 MHz,  $CDCl_3$ )  $\delta$ : 197.8, 162.4, 159.7, 150.7, 139.7, 138.5, 131.7, 129.1, 128.9, 128.8, 128.4, 124.0, 121.3, 53.9, 47.0, 32.6, 28.3, 17.7; Anal. Calcd for  $C_{24}H_{22}BrNO$ : C, 68.58; H, 5.28; N, 3.33. Found C, 68.30; H, 5.28; N, 3.53.

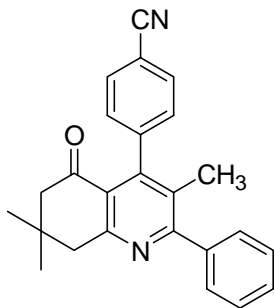

**4-(5,6,7,8-tetrahydro-3,7,7-trimethyl-5-oxo-2-phenylquinolin-4-yl)benzonitrile (6h):**

Yellow solid, mp 152-154 °C ( $CH_2Cl_2$  + EtOAc, equal volumes); IR  $\nu_{max}$  (KBr) 3428, 3051, 2945, 2872, 1684, 1574, 1530, and 1345  $cm^{-1}$ ;  $^1H$  NMR (300 MHz,  $CDCl_3$ )  $\delta$ : 7.72 (2H, d,  $J = 7.8$  Hz), 7.52-7.42 (5H, m), 7.19 (2H, d,  $J = 7.8$  Hz), 3.16 (2H, s), 2.44 (2H, s), 1.89 (3H, s), 1.11 (6H, s);  $^{13}C$  NMR (75 MHz,  $CDCl_3$ )  $\delta$ : 197.9, 162.9, 160.1, 149.6, 145.1, 139.7, 132.3, 129.0, 128.9, 128.5, 128.3, 128.1, 123.4, 118.9, 111.1, 53.7, 47.1, 28.2, 17.6; Anal. Calcd for  $C_{25}H_{22}N_2O$ : C, 81.94; H, 6.05; N, 7.64. Found C, 82.20; H, 6.15; N, 7.44.

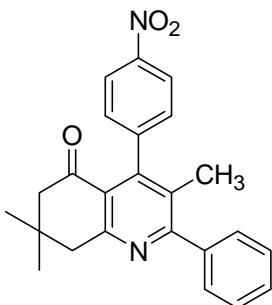

**3,7,7-Trimethyl-4-(4-nitro-phenyl)-2-phenyl-7,8-dihydro-6H-quinolin-5-one (6i):**

Yellowish white solid, mp 172-174 °C (CH<sub>2</sub>Cl<sub>2</sub> + EtOAc, equal volumes); IR  $\nu_{\max}$  (KBr) 3434, 3044, 2946, 2871, 1680, 1574, 1530, and 1353 cm<sup>-1</sup>; <sup>1</sup>H NMR (300 MHz, CDCl<sub>3</sub>)  $\delta$ : 8.30 (2H, d, J = 8.7 Hz), 7.54-7.41 (5H, m), 7.25 (2H, d, J = 9.3 Hz), 3.15 (2H, s), 2.45 (2H, s), 1.90 (3H, s), 1.11 (6H, s); <sup>13</sup>C NMR (75 MHz, CDCl<sub>3</sub>)  $\delta$ : 197.5, 162.5, 159.9, 149.8, 147.1, 146.8, 138.8, 129.1, 129.0, 128.6, 128.4, 128.1, 123.8, 123.6, 53.6, 46.6, 32.6, 28.1, 17.5; Anal. Calcd for C<sub>24</sub>H<sub>22</sub>N<sub>2</sub>O<sub>3</sub>: C, 74.59; H, 5.74; N, 7.25. Found C, 74.59; H, 5.80; N, 7.45.

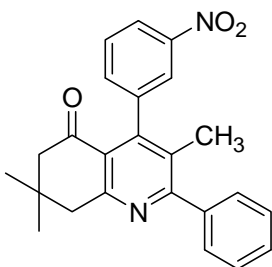

**7,8-dihydro-3,7,7-trimethyl-4-(3-nitrophenyl)-2-phenylquinolin-5(6H)-one (6j):**

Yellowish white solid, mp 162-164 °C (CH<sub>2</sub>Cl<sub>2</sub> + EtOAc, equal volumes); IR  $\nu_{\max}$  (KBr) 3427, 3051, 2945, 2872, 1680, 1574, 1530, and 1349 cm<sup>-1</sup>; <sup>1</sup>H NMR (300 MHz, CDCl<sub>3</sub>)  $\delta$ : 8.27 (1H, d, J = 8.4 Hz), 7.99 (1H, s), 7.64 (1H, t, J = 7.8 Hz), 7.56-7.44 (6H, m), 3.16 (2H, s), 2.48 (2H, s), 1.95 (3H, s), 1.13 (6H, br s); <sup>13</sup>C NMR (75 MHz, CDCl<sub>3</sub>)  $\delta$ : 197.6, 162.7, 160.0, 149.3, 148.5, 141.2, 139.1, 133.5, 129.4, 129.0, 128.8, 128.4, 123.8, 122.3, 53.7, 46.8, 32.6, 28.4, 28.1, 17.7; Anal. Calcd for C<sub>24</sub>H<sub>22</sub>N<sub>2</sub>O<sub>3</sub>: C, 74.59; H, 5.74; N, 7.25. Found C, 74.89; H, 5.84; N, 7.25.

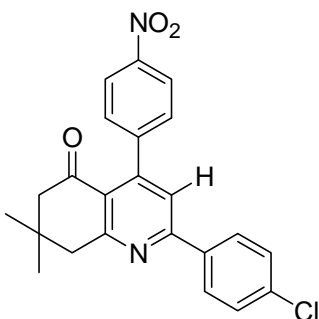

**2-(4-chlorophenyl)-7,8-dihydro-7,7-dimethyl-4-(4-nitrophenyl)quinolin-5(6H)-one (6k):**

White solid, mp 186-188°C (CH<sub>2</sub>Cl<sub>2</sub> + EtOAc, equal volumes); IR  $\nu_{\max}$  (KBr) 3430, 3048, 2946, 2871, 1680, 1574, 1530, and 1335 cm<sup>-1</sup>; <sup>1</sup>H NMR (300 MHz, CDCl<sub>3</sub>)  $\delta$ : 8.28 (2H, d, J = 8.4 Hz), 8.04 (2H, d, J = 8.4 Hz), 7.51-7.40 (5H, m), 3.22 (2H, s), 2.57 (2H, s), 1.17 (6H, s); <sup>13</sup>C NMR (75 MHz, CDCl<sub>3</sub>)  $\delta$ : 197.5, 164.0, 158.6, 150.0, 147.4, 136.8, 136.0, 129.2, 129.1, 128.8, 128.7, 123.4, 120.7, 53.5, 47.6, 32.7, 28.3; Anal. Calcd for C<sub>23</sub>H<sub>19</sub>ClN<sub>2</sub>O<sub>3</sub>: C, 67.90; H, 4.71; N, 6.89. Found C, 68.04; H, 4.71; N, 6.71.

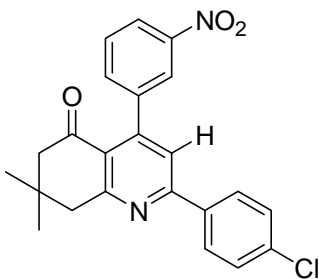

**2-(4-chlorophenyl)-7,8-dihydro-7,7-dimethyl-4-(3-nitrophenyl)quinolin-5(6H)-one (6l):**

Yellowish white solid, mp 152-154 °C (CH<sub>2</sub>Cl<sub>2</sub> + EtOAc, equal volumes); IR  $\nu_{\max}$  (KBr) 3424, 3051, 2954, 2872, 1681, 1572, and 1525 cm<sup>-1</sup>; <sup>1</sup>H NMR (300 MHz, CDCl<sub>3</sub>)  $\delta$ : 8.30-8.27 (1H, m), 8.15 (1H, s), 8.05 (2H, d, J = 8.4 Hz), 7.61-7.59 (2H, m), 7.50-7.47 (3H, m), 3.28 (2H, s), 2.56 (2H, s), 1.17 (6H, s); <sup>13</sup>C NMR (75 MHz, CDCl<sub>3</sub>)  $\delta$ : 197.5, 164.0, 158.6, 149.8, 148.0, 141.9, 136.9, 135.9, 134.1, 129.2, 128.9, 123.5, 122.9, 121.2, 53.6, 47.6, 32.7, 28.3; Anal. Calcd for C<sub>23</sub>H<sub>19</sub>ClN<sub>2</sub>O<sub>3</sub>: C, 67.90; H, 4.71; N, 6.89. Found C, 67.99; H, 4.81; N, 6.80.

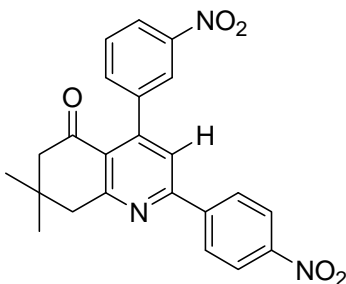



**7,8-dihydro-7,7-dimethyl-4-(3-nitrophenyl)-2-(4-nitrophenyl)quinolin-5(6H)-one (6m):**

Yellowish solid, mp 182-184 °C (CH<sub>2</sub>Cl<sub>2</sub> + EtOAc, equal volumes); IR  $\nu_{\max}$  (KBr) 3427, 3051, 2945, 2872, 1680, 1574, 1530, and 1349 cm<sup>-1</sup>; <sup>1</sup>H NMR (300 MHz, CDCl<sub>3</sub>)  $\delta$ : 8.36-8.26 (5H, m), 8.15 (1H, s), 7.65-7.58 (3H, m), 3.26 (2H, s), 2.58 (2H, s), 1.19 (6H, s); <sup>13</sup>C NMR (75 MHz, CDCl<sub>3</sub>)  $\delta$ : 197.9, 164.7, 157.5, 150.4, 149.3, 148.5, 143.9, 143.8, 141.9, 134.9, 134.4, 130.7, 130.0, 129.5, 128.8, 125.7, 124.7, 124.5, 124.2, 123.4, 123.3, 123.0, 122.4, 54.0, 48.1, 33.1, 28.7; Anal. Calcd for C<sub>23</sub>H<sub>19</sub>N<sub>3</sub>O<sub>5</sub>: C, 66.18; H, 4.59; N, 10.07. Found C, 66.48; H, 4.59; N, 10.17.

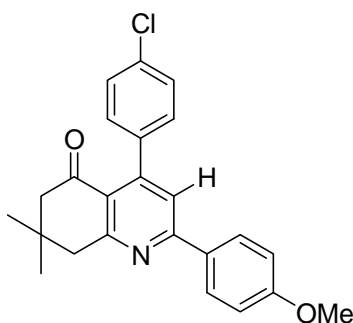

**4-(4-chlorophenyl)-7,8-dihydro-2-(4-methoxyphenyl)-7,7-dimethylquinolin-5(6H)-one (6n):**

White solid, mp 122-124 °C (CH<sub>2</sub>Cl<sub>2</sub> + EtOAc, equal volumes); IR  $\nu_{\max}$  (KBr) 3424, 3058, 2945, 1680, 1574, 1530, 1346 and 1259cm<sup>-1</sup>; <sup>1</sup>H NMR (300 MHz, CDCl<sub>3</sub>)  $\delta$ : 8.05 (2H, d, J = 9.0 Hz), 8.15 (1H, s), 7.40-7.37 (3H, m), 7.21 (2H, d, J = 8.4 Hz), 7.00 (2H, d, J 8.7 Hz), 3.87 (3H, s), 3.18 (2H, s), 2.53 (2H, s), 1.56 (6H, s); <sup>13</sup>C NMR (75 MHz, CDCl<sub>3</sub>)  $\delta$ : 197.6, 163.6, 161.6, 160.0, 151.1, 138.9, 133.9, 130.9, 129.5, 129.3, 129.1, 128.3, 123.1, 120.9, 114.4, 113.9, 55.5, 53.8, 47.6, 32.6, 28.3; Anal. Calcd for C<sub>24</sub>H<sub>22</sub>ClNO<sub>2</sub>: C, 73.56; H, 5.66; N, 3.57. Found C, 73.85; H, 5.66; N, 3.80.

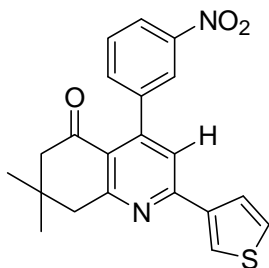

**7,8-dihydro-7,7-dimethyl-4-(3-nitrophenyl)-2-(thiophen-2-yl)quinolin-5(6H)-one (6o):**

Yellowish white solid, mp 202-204 °C (CH<sub>2</sub>Cl<sub>2</sub> + EtOAc, equal volumes); IR  $\nu_{\max}$  (KBr) 3427, 3051, 2945, 2872, 1680, 1574, 1530, and 1346 cm<sup>-1</sup>; <sup>1</sup>H NMR (300 MHz, CDCl<sub>3</sub>)  $\delta$ : 8.28-8.24 (1H, m), 8.13 (1H, s), 7.69 (1H, d, J = 3.6 Hz), 7.61-7.51 (3H, m), 7.37 (1H, s), 7.14 (1H, t, J = 4.8 Hz), 3.16 (2H, s), 2.51 (2H, s),

1.15 (6H, br s) ; Anal. Calcd for  $C_{21}H_{18}N_2O_3S$ : C, 66.65; H, 4.79; N, 7.40. Found C, 67.01; H, 4.78; N, 7.22.

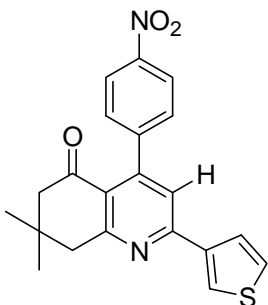

**7,8-dihydro-7,7-dimethyl-4-(4-nitrophenyl)-2-(thiophen-2-yl)quinolin-5(6H)-one (6p):**

Yellowish white solid, mp 198-200 °C ( $CH_2Cl_2$  + EtOAc, equal volumes); IR  $\nu_{max}$  (KBr) 3423, 3059, 2945, 2872, 1680, 1574, 1530, 1346 and 1259  $cm^{-1}$ ;  $^1H$  NMR (300 MHz,  $CDCl_3$ )  $\delta$ : 8.27 (2H, d,  $J = 8.7$  Hz), 7.69 (1H, d,  $J = 3.3$  Hz), 7.52 (1H, d,  $J = 4.8$  Hz), 7.40 (2H, d,  $J = 8.7$  Hz), 7.34 (1H, s), 7.14 (1H, t,  $J = 4.4$  Hz), 3.16 (2H, s), 2.51 (2H, s), 1.15 (6H, br s); Anal. Calcd for  $C_{21}H_{18}N_2O_3S$ : C, 66.65; H, 4.79; N, 7.40. Found C, 66.65; H, 4.94; N, 7.41.

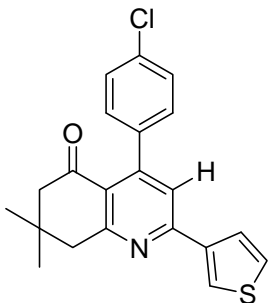

**4-(4-chlorophenyl)-7,8-dihydro-7,7-dimethyl-2-(thiophen-2-yl)quinolin-5(6H)-one (6q):**

Yellowish white solid, mp 172-174 °C ( $CH_2Cl_2$  + EtOAc, equal volumes); IR  $\nu_{max}$  (KBr) 3432, 3050, 2957, 2872, 1686, 1573, 1523 and 1347  $cm^{-1}$ ;  $^1H$  NMR (300 MHz,  $CDCl_3$ )  $\delta$ : 7.66 (1H, d,  $J = 5.1$  Hz), 7.48 (1H, d,  $J = 5.1$  Hz), 7.37 (2H, d,  $J = 9.0$  Hz), 7.33 (1H, s), 7.18 (2H, d,  $J = 9.0$  Hz), 7.11 (1H, t,  $J = 5.0$  Hz), 3.12 (2H, s), 2.49 (2H, s), 1.10 (6H, br s);  $^{13}C$  NMR (75 MHz,  $CDCl_3$ )  $\delta$ : 197.3, 163.9, 154.4, 150.9, 143.5, 138.6, 133.9, 129.9, 129.1, 128.4, 128.2, 126.8, 123.4, 119.7, 53.6, 47.4, 32.5, 28.2; Anal. Calcd for  $C_{21}H_{18}ClNOS$ : C, 68.56; H, 4.93; N, 3.81. Found C, 68.85; H, 5.01; N, 4.01.

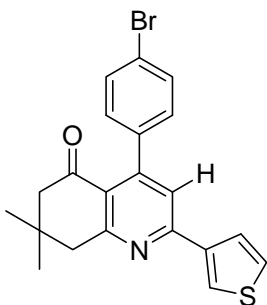

**4-(4-bromophenyl)-7,8-dihydro-7,7-dimethyl-2-(thiophen-2-yl)quinolin-5(6H)-one (6r):**

Yellowish white solid, mp 182-184 °C (CH<sub>2</sub>Cl<sub>2</sub> + EtOAc, equal volumes); IR  $\nu_{\max}$  (KBr) 3427, 3050, 2957, 2872, 1686, 1574, 1530, 1346 and 1269 cm<sup>-1</sup>; <sup>1</sup>H NMR (300 MHz, CDCl<sub>3</sub>)  $\delta$ : 7.62 (1H, d, J = 3.2 Hz), 7.47 (2H, d, J = 9.6 Hz), 7.43 (1H, d, J = 4.7, Hz), 7.28 (1H, s), 7.08-7.04 (3H, m), 3.08 (2H, s), 2.44 (2H, s), 1.08 (6H, b rs); Anal. Calcd for C<sub>21</sub>H<sub>18</sub>BrNOS: C, 61.17; H, 4.40; N, 3.40. Found C, 61.17; H, 4.51; N, 3.59.

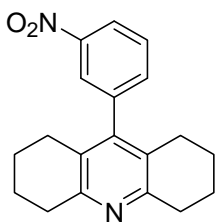

**1,2,3,4,5,6,7,8-octahydro-9-(3-nitrophenyl)acridine (6s):**

Yellow liquid; IR  $\nu_{\max}$  (Neat) 3432, 3061, 2872, 1684, 1573, 1523 and 1333 cm<sup>-1</sup>; <sup>1</sup>H NMR (300 MHz, CDCl<sub>3</sub>)  $\delta$ : 8.34 (1H, s), 8.21 (1H, d, J = 8.1 Hz), 7.80 (1H, d, J = 7.2, Hz), 7.59 (1H, t, J = 8.1 Hz), 2.94 (2H, s), 2.66-2.58 (7H, m), 1.87-1.82 (7H, m), 1.72-1.64 (2H, m); <sup>13</sup>C NMR (75 MHz, CDCl<sub>3</sub>)  $\delta$ : 153.5, 152.5, 148.1, 146.4, 142.1, 135.4, 130.7, 129.1, 128.0, 124.3, 122.6, 32.6, 27.9, 26.4, 25.5, 22.7, 22.5, 22.3; Anal. Calcd for C<sub>19</sub>H<sub>20</sub>N<sub>2</sub>O<sub>2</sub>: C, 74.00; H, 6.54; N, 9.08. Found C, 74.30; H, 6.60; N, 9.19.

Copy of spectra for 6a-6s

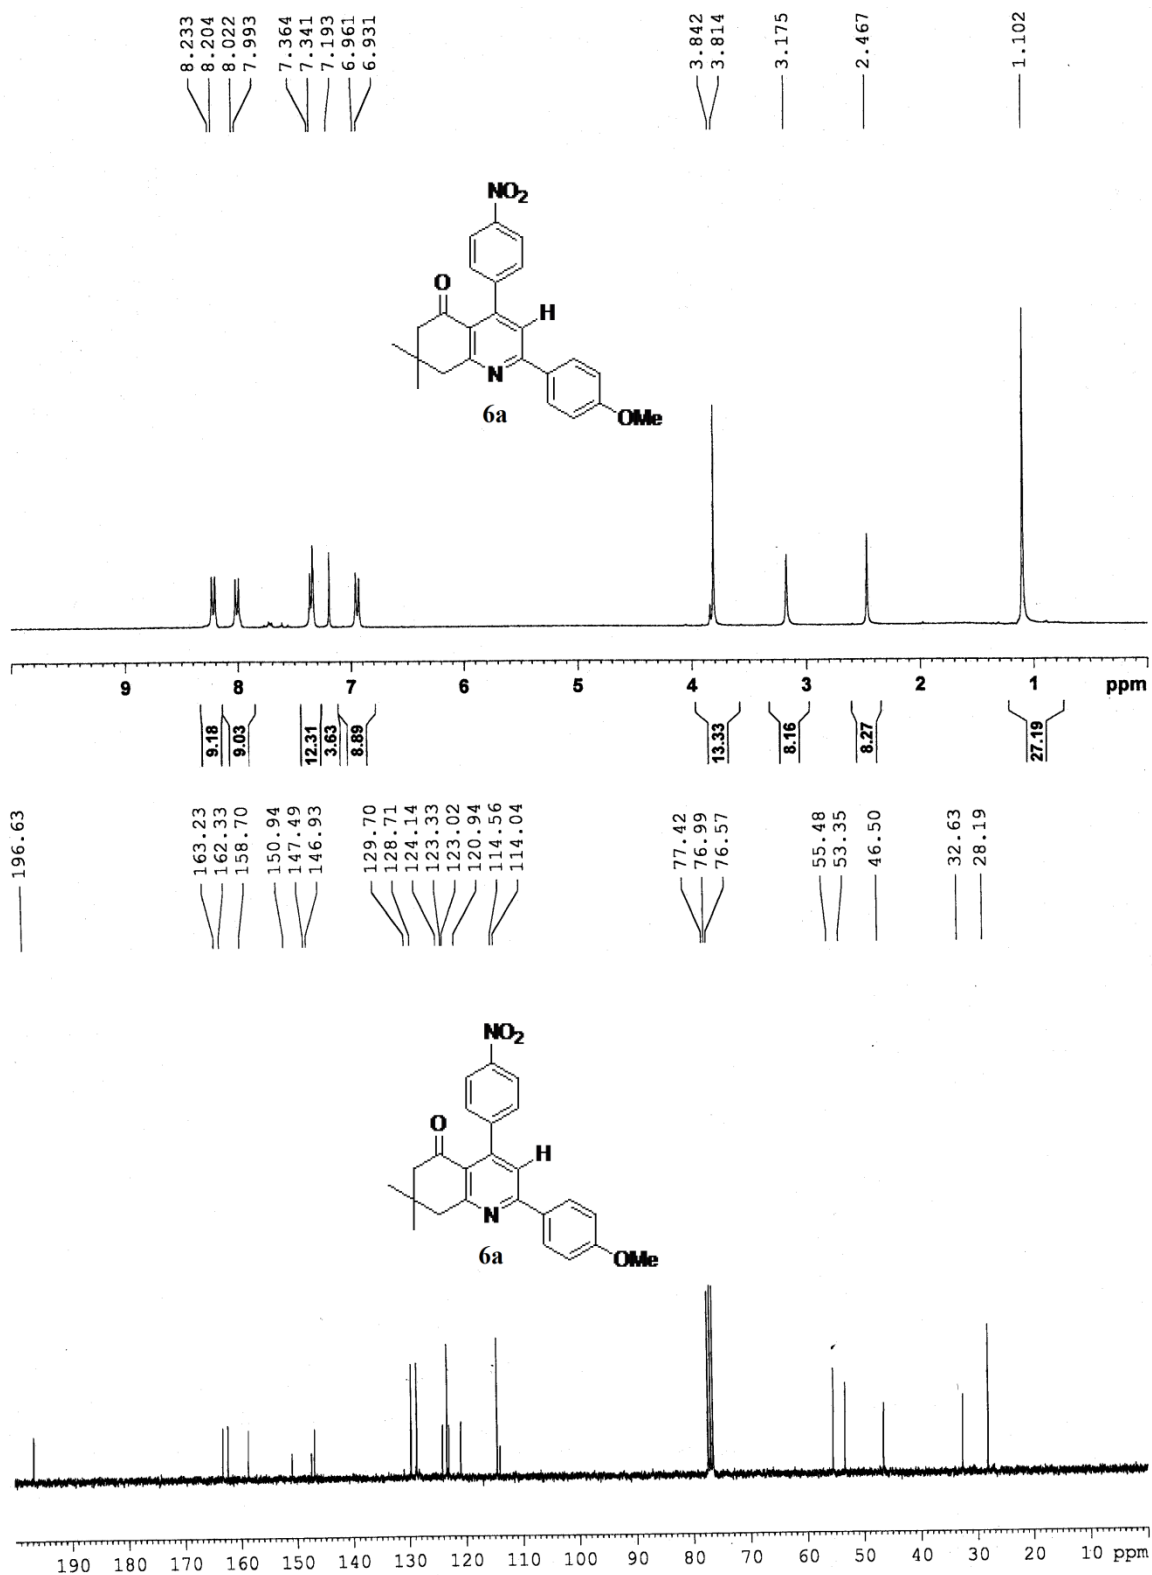

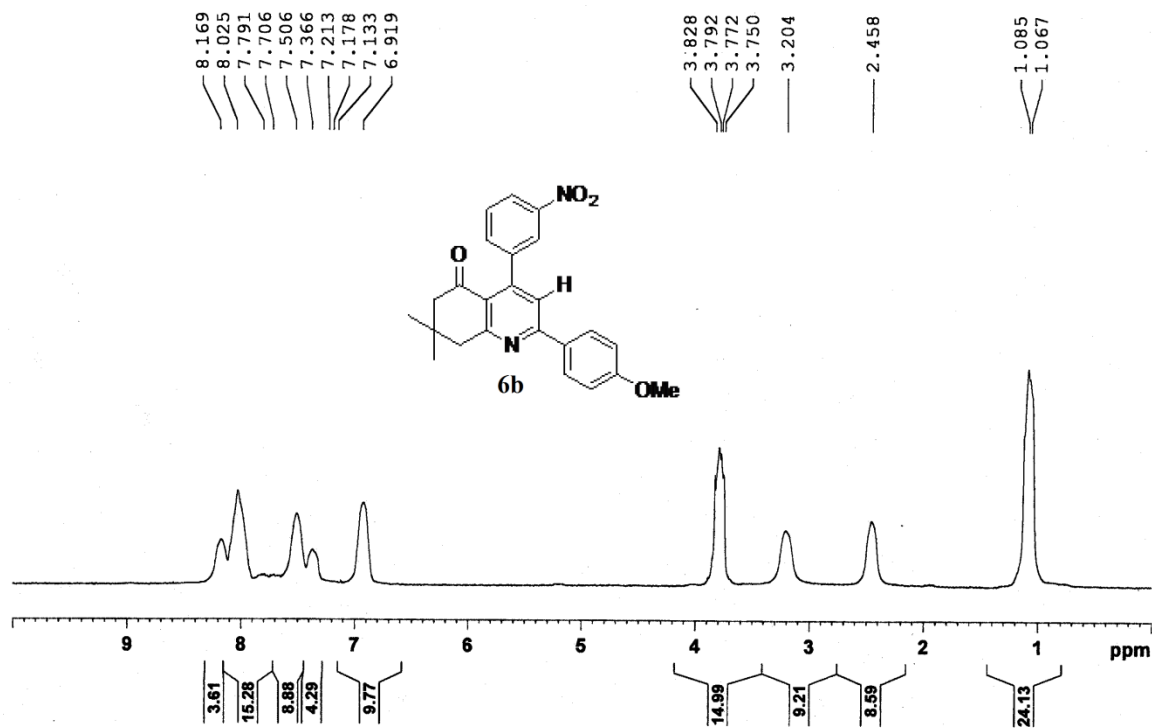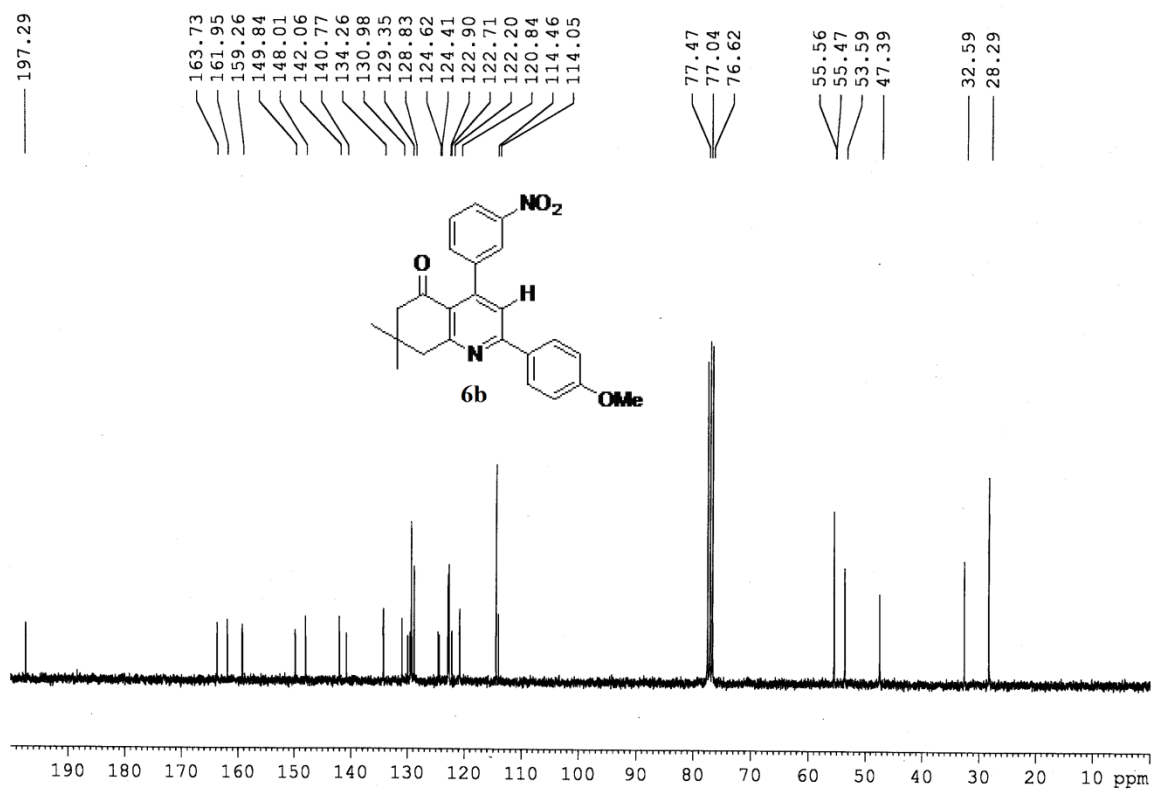

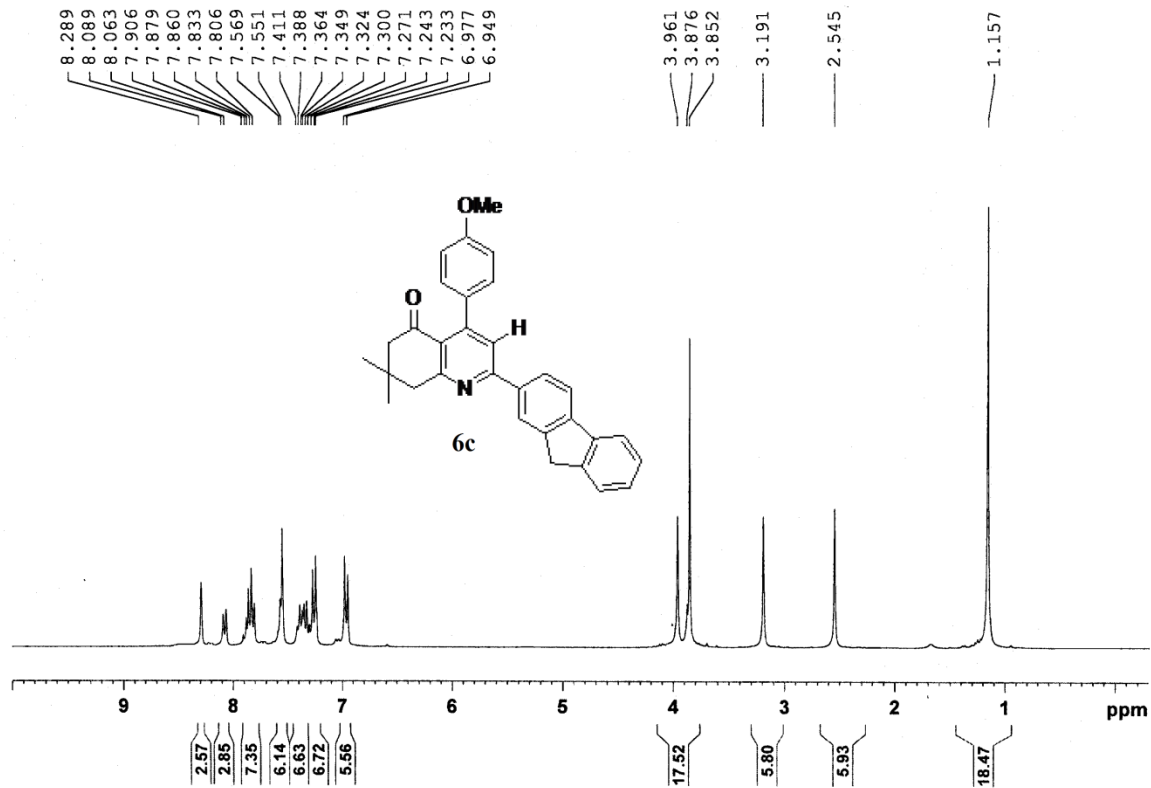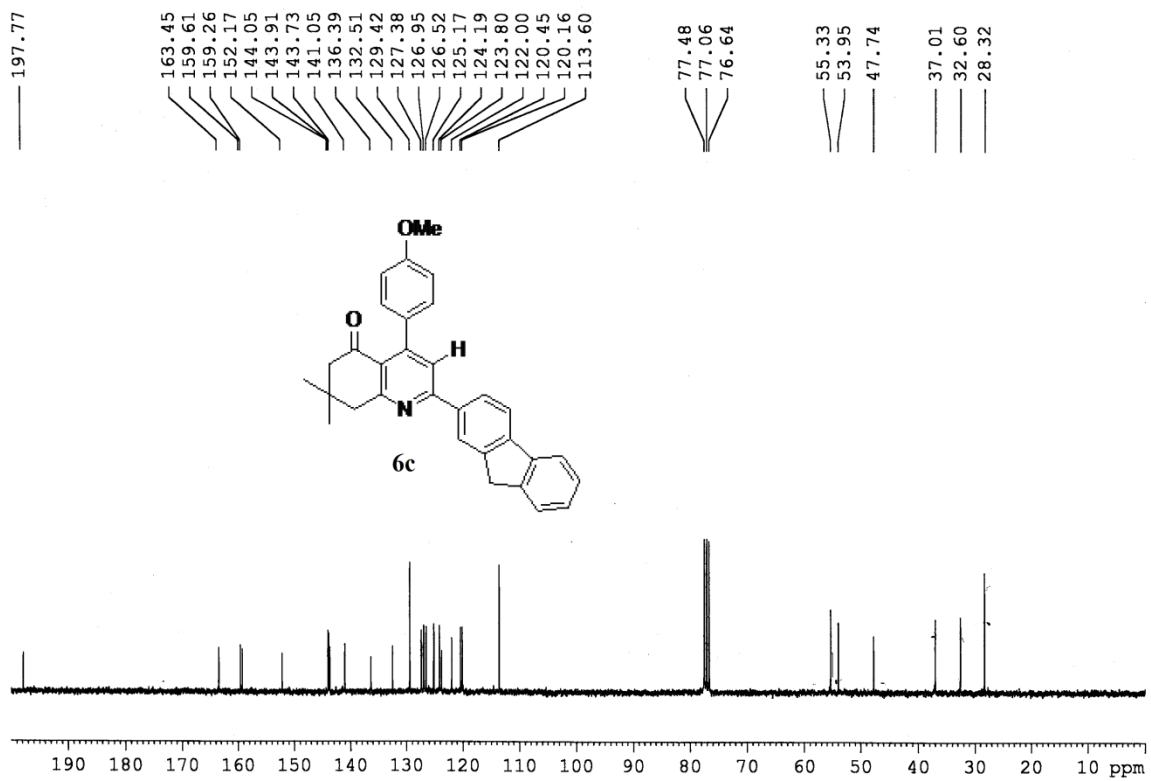

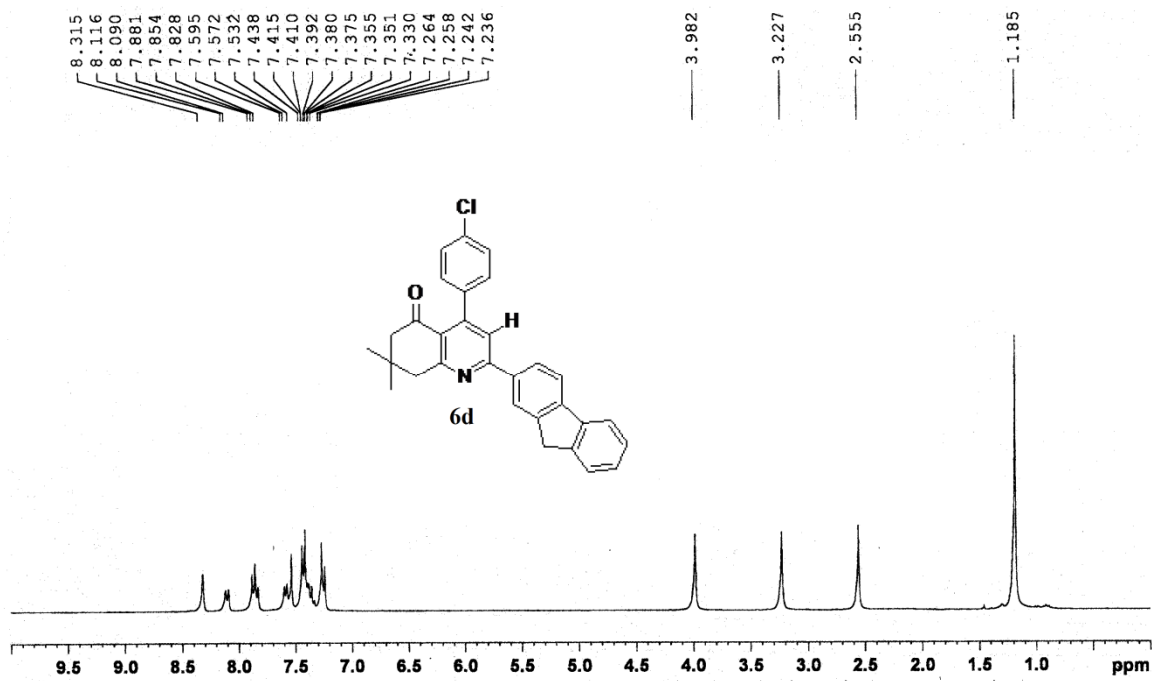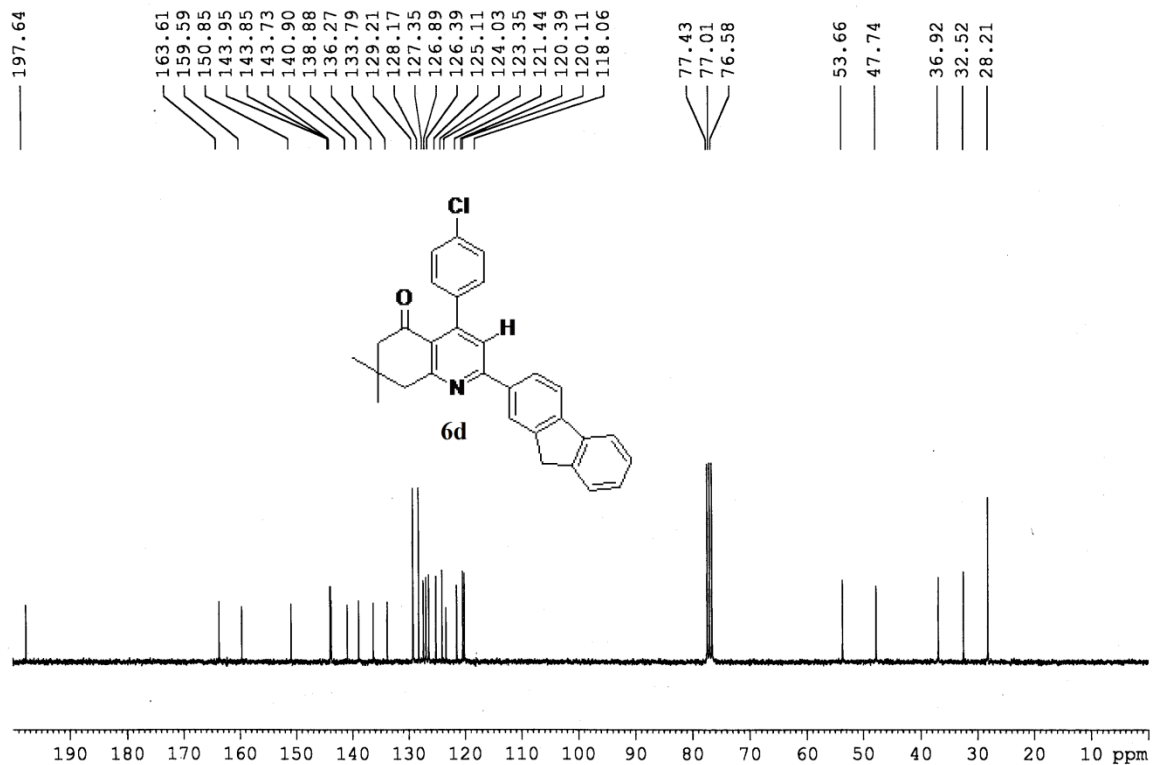

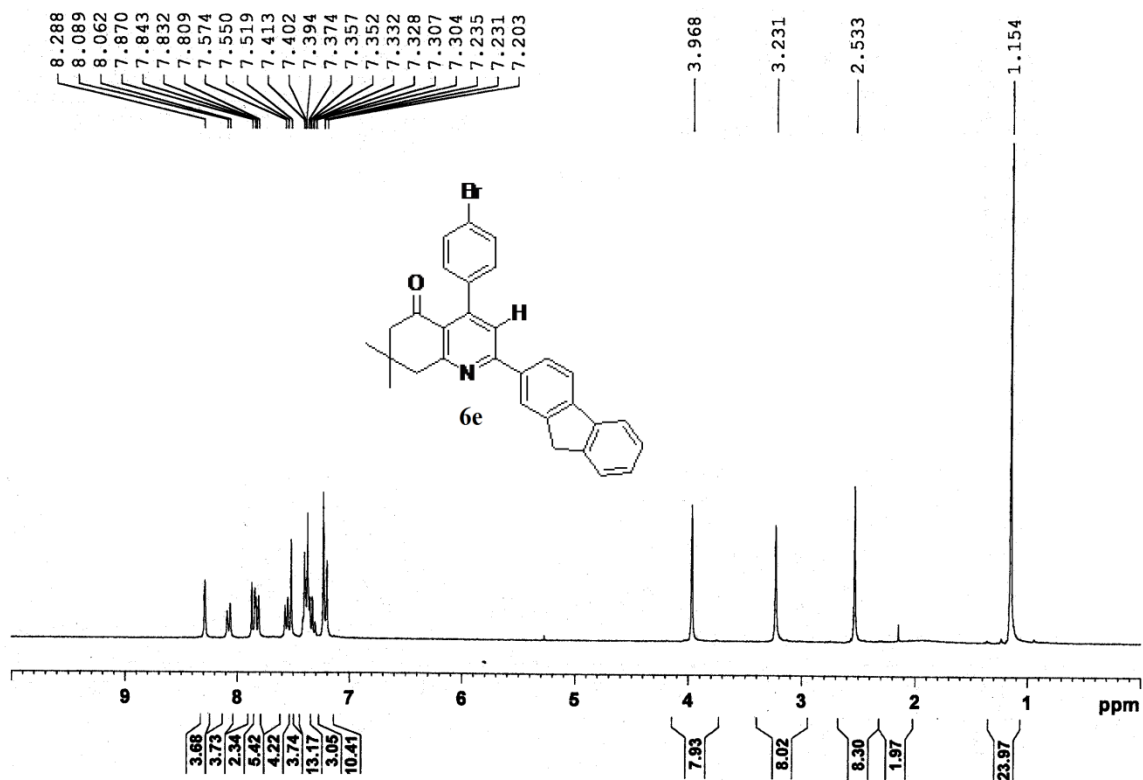

C13DEPTQ135-C

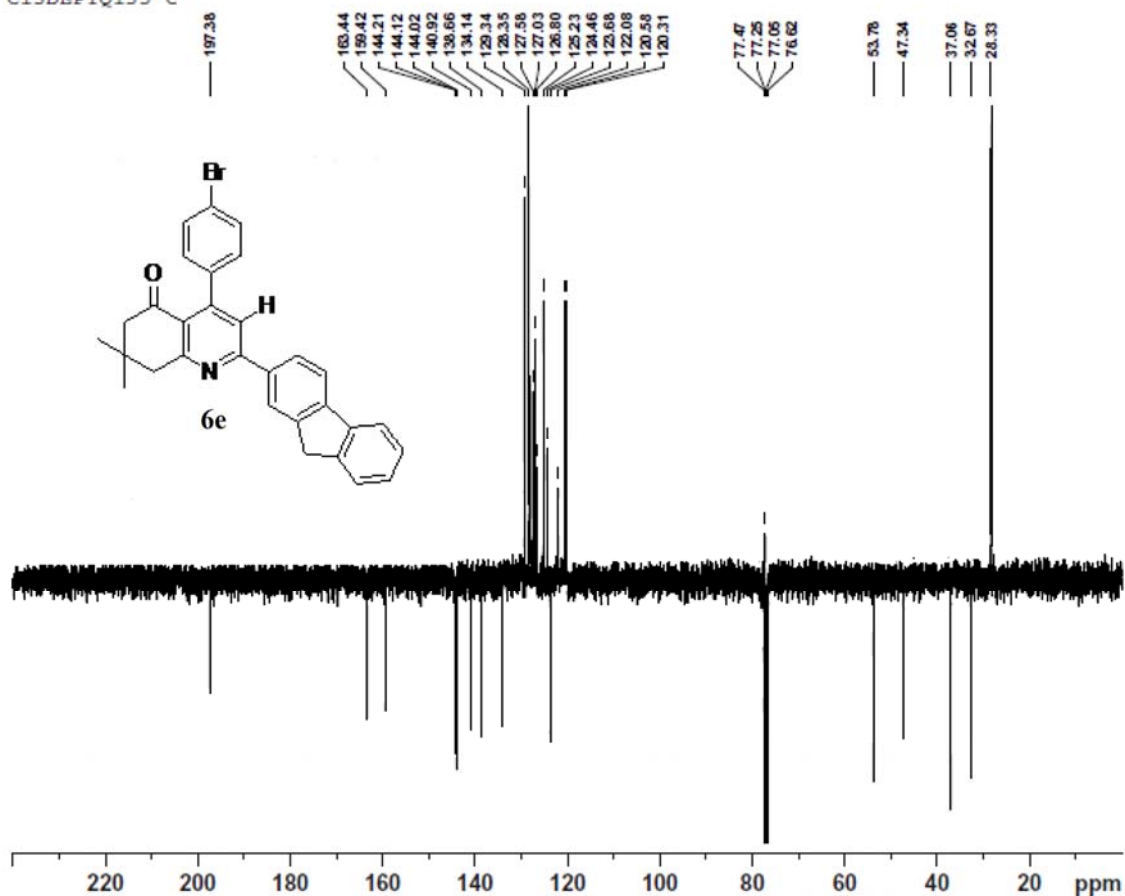



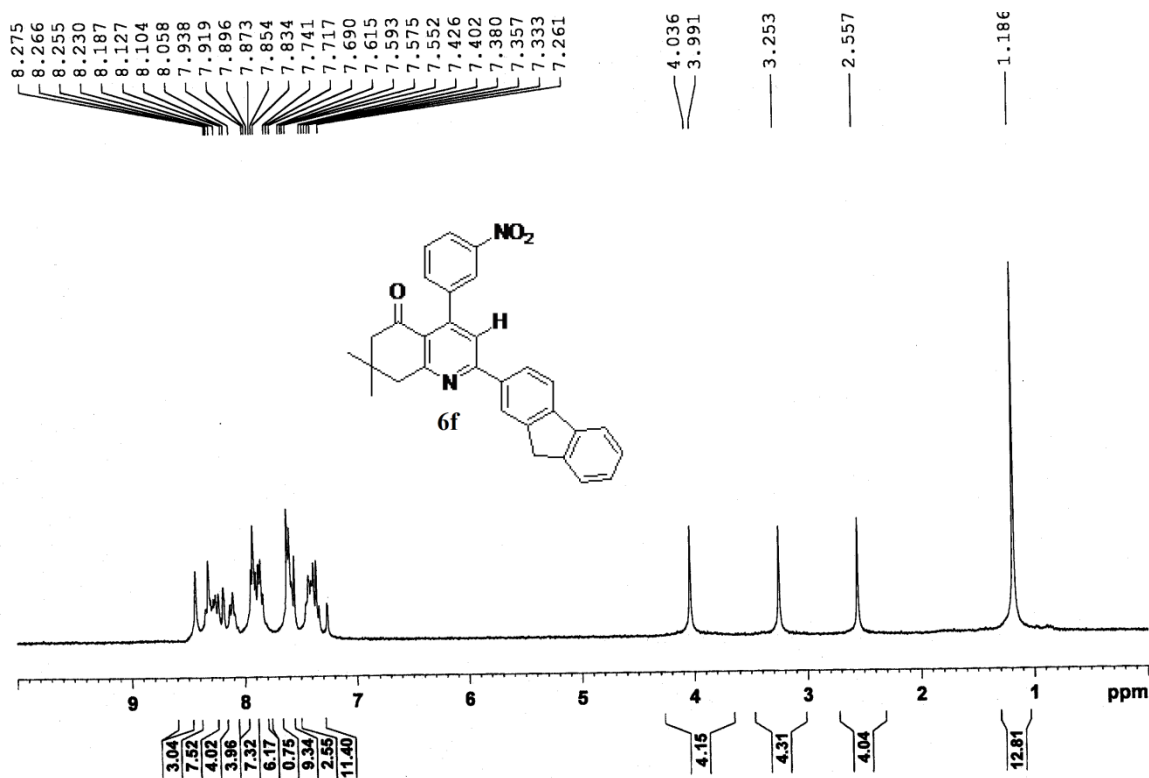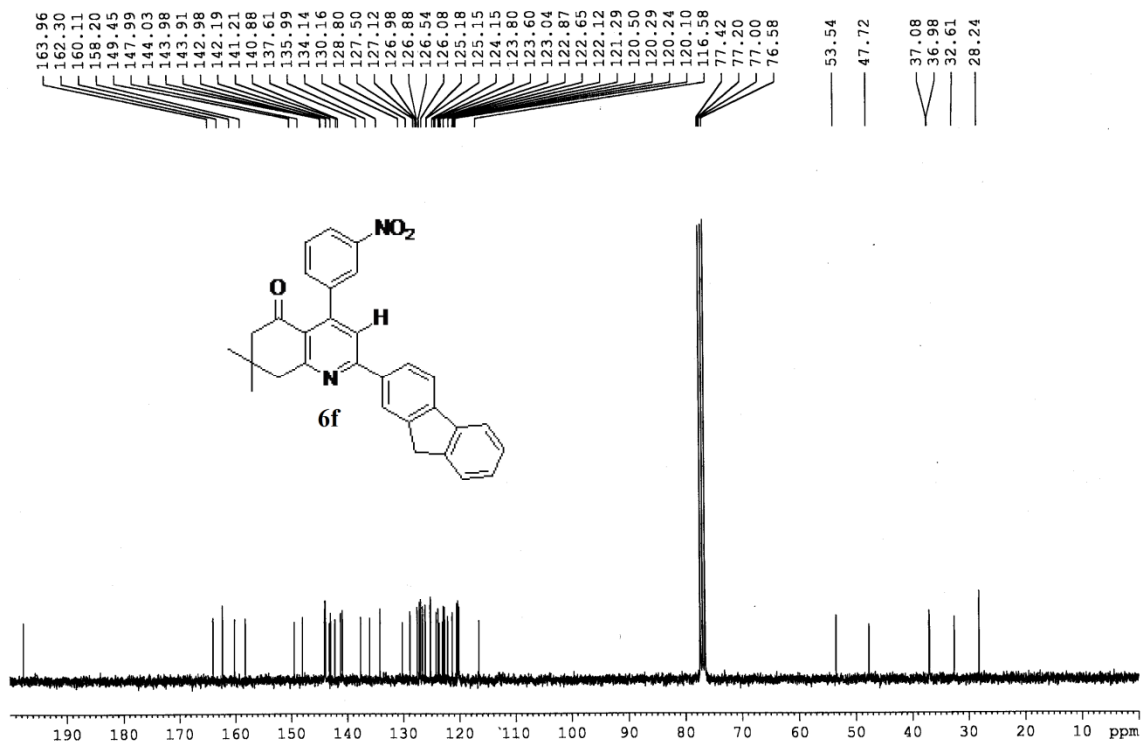

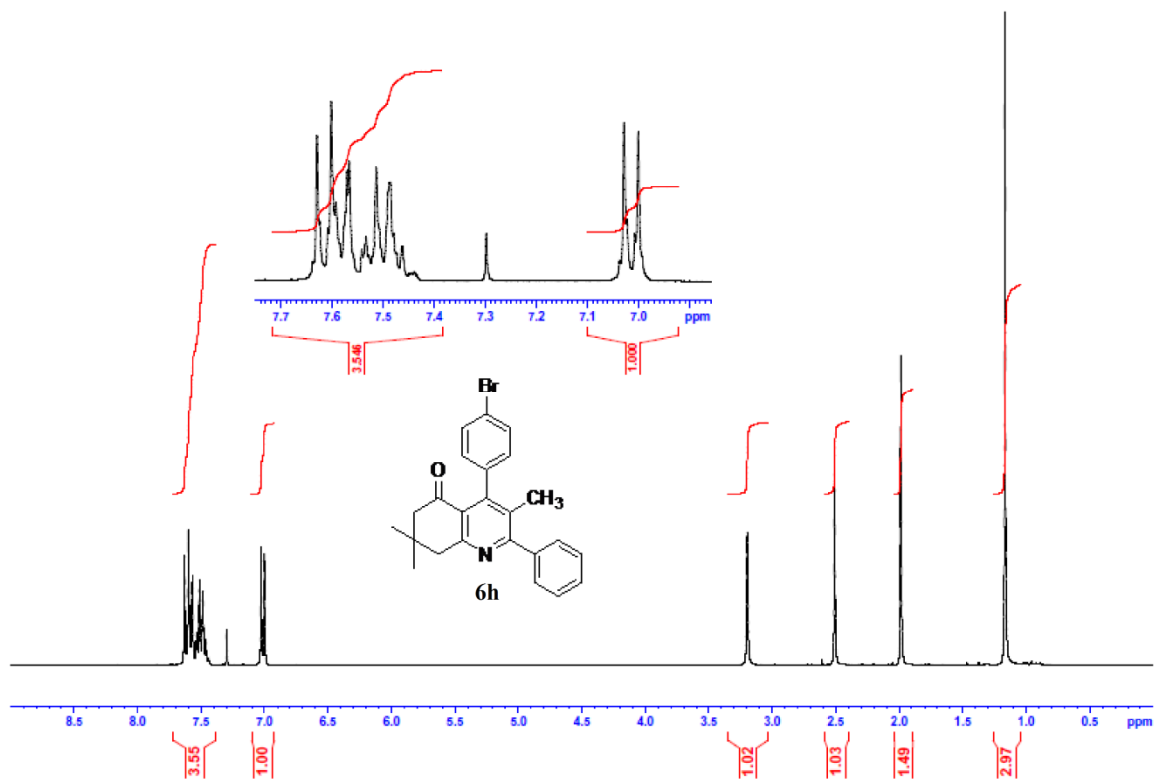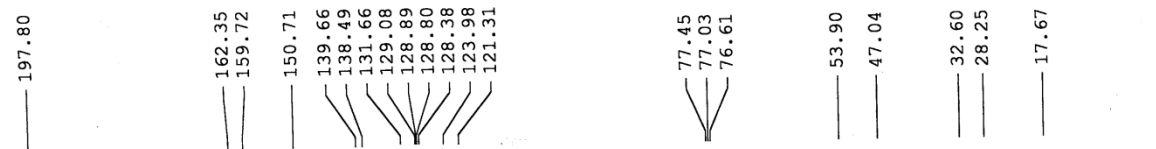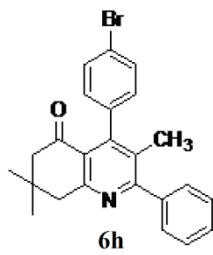

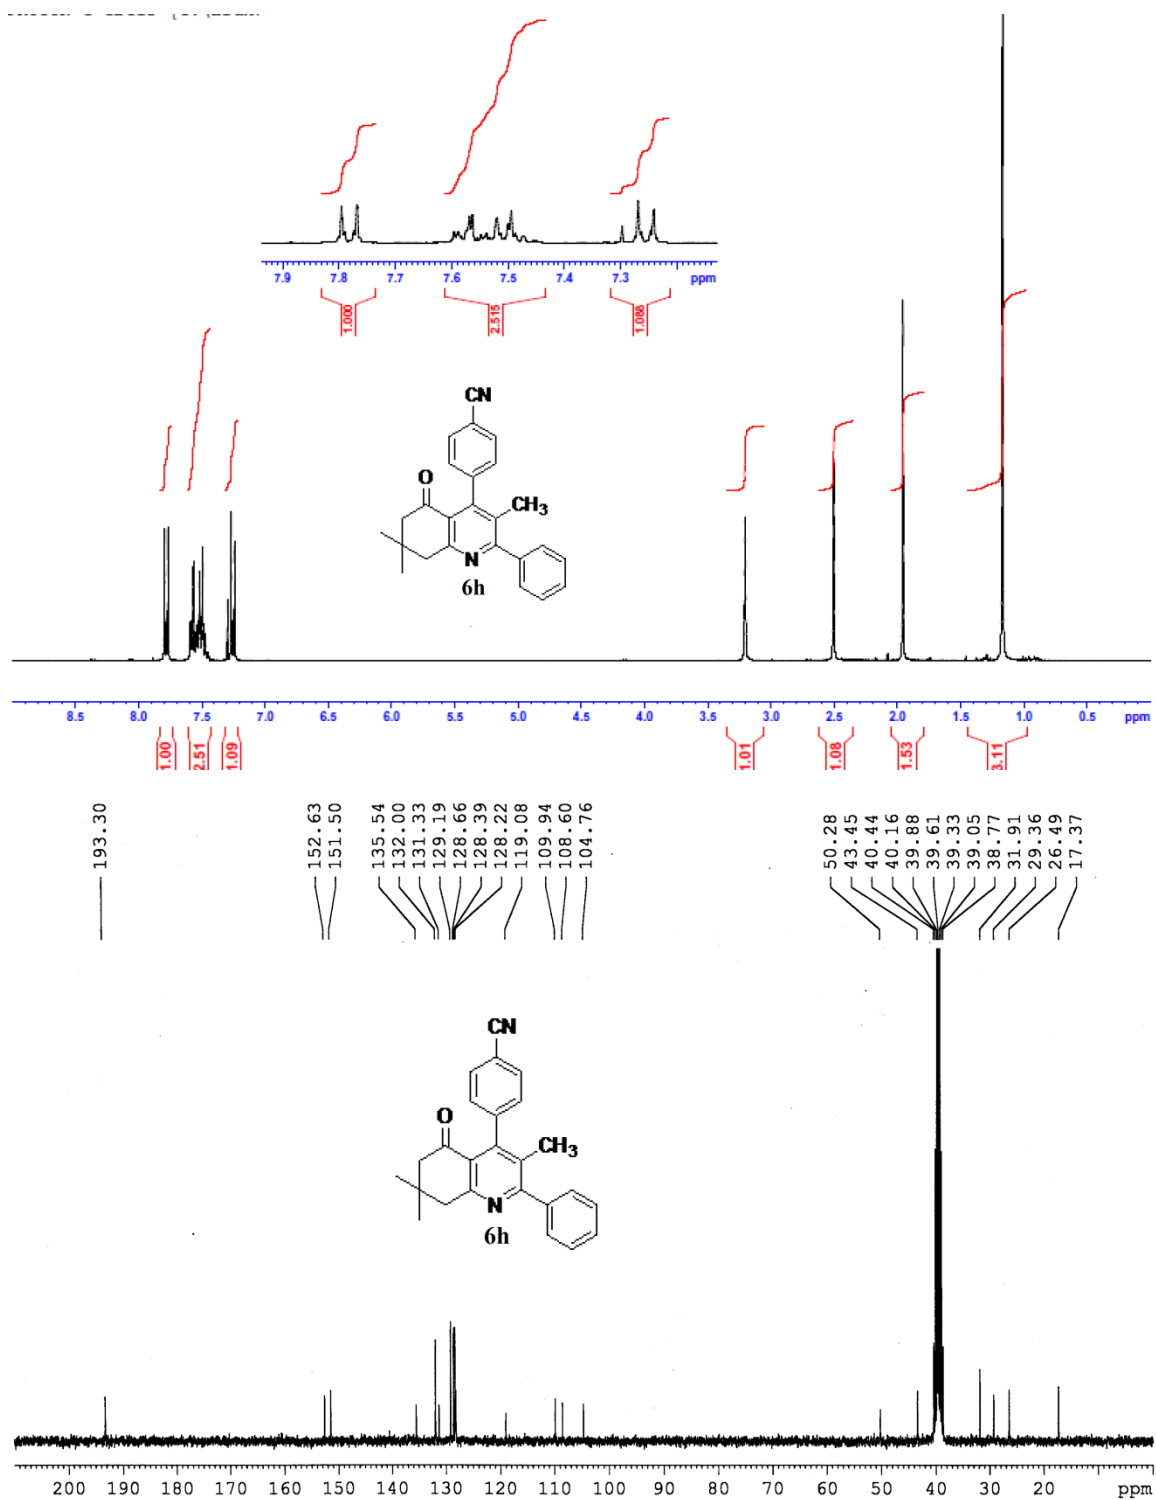

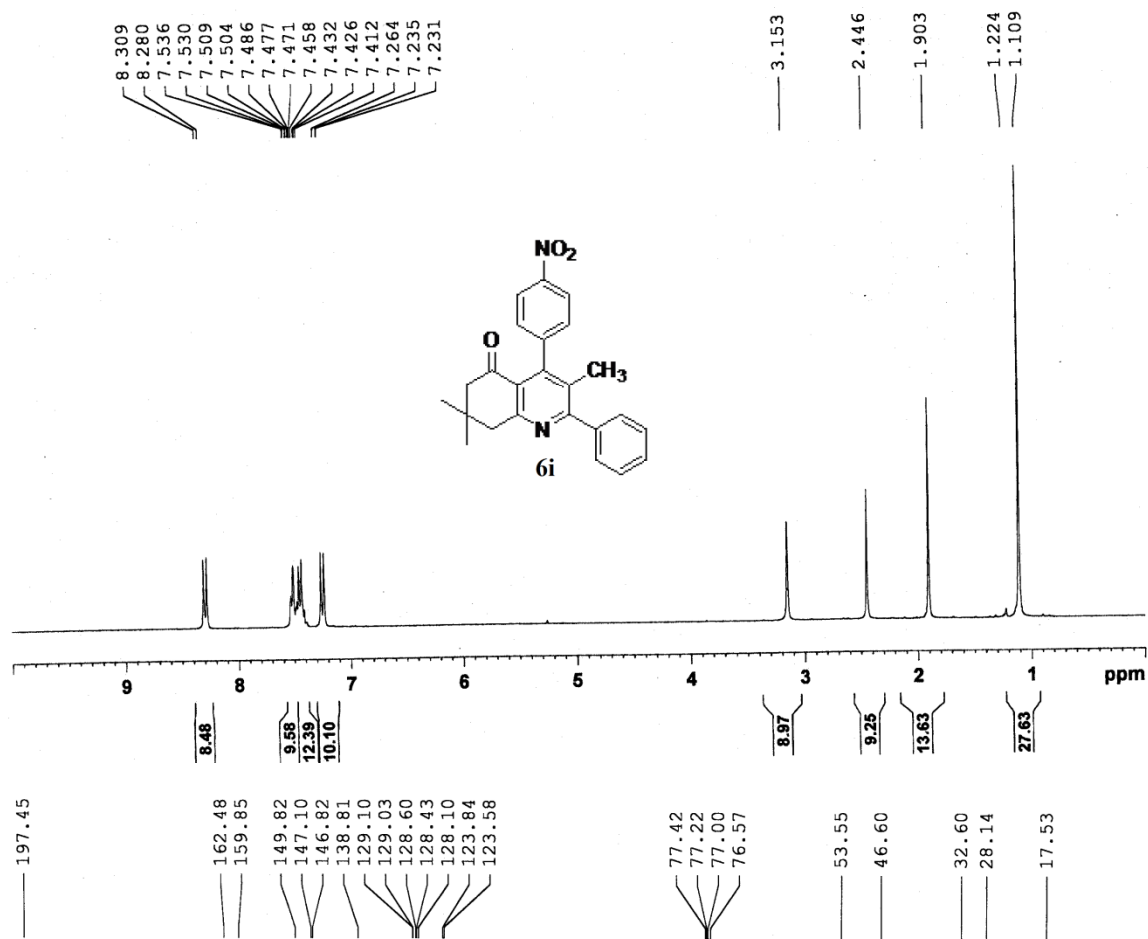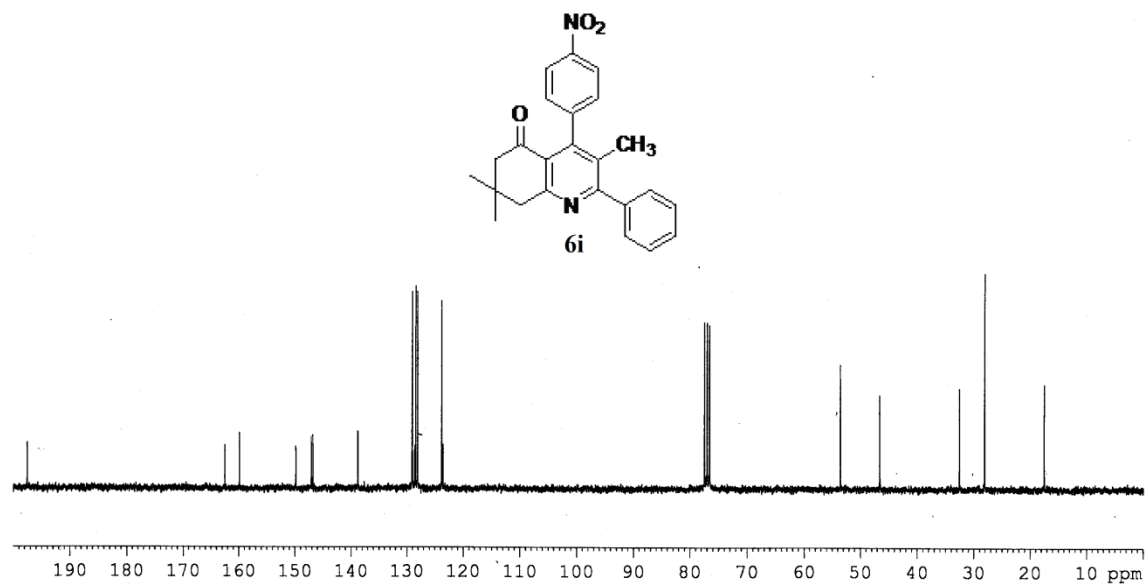

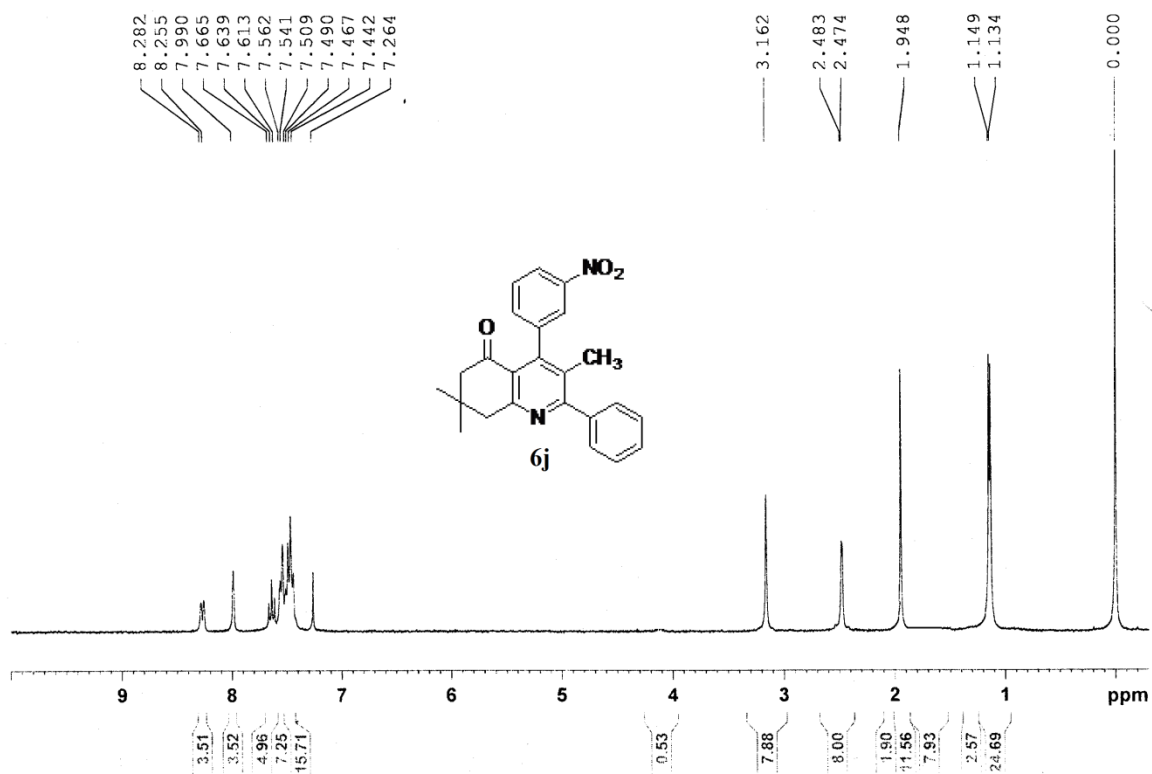

C13LEPTQ135-C

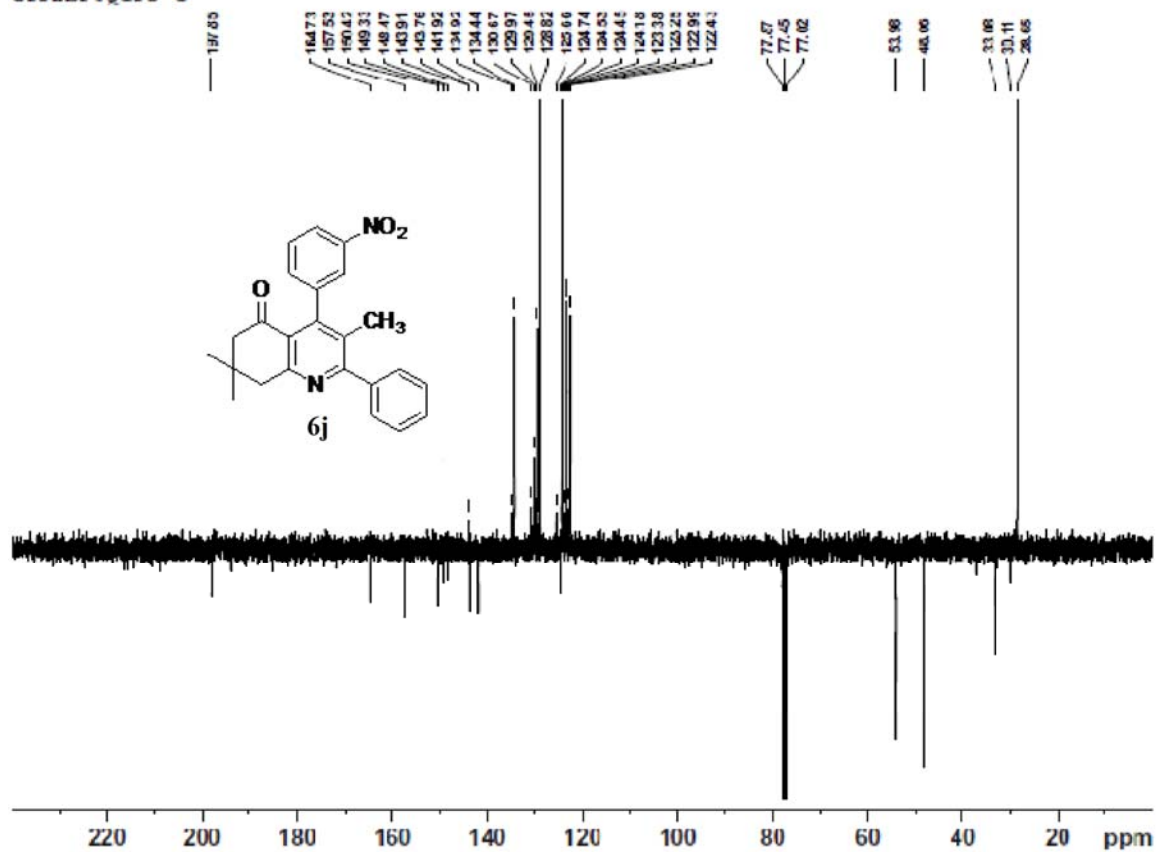

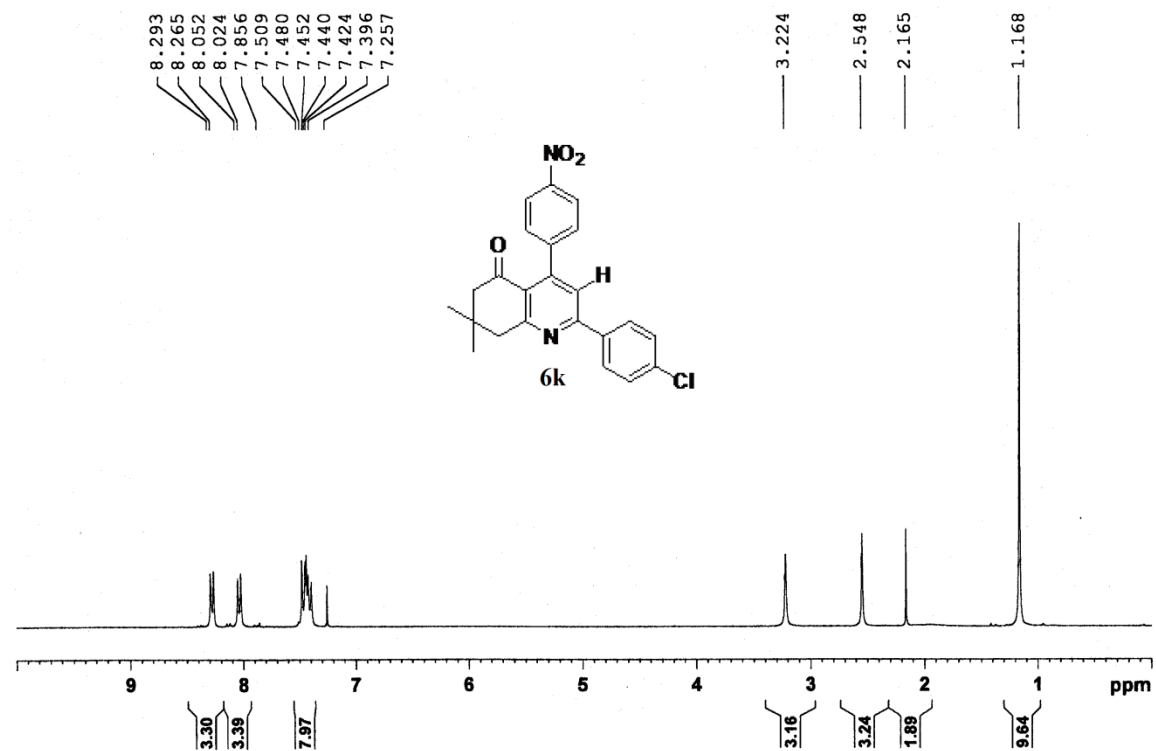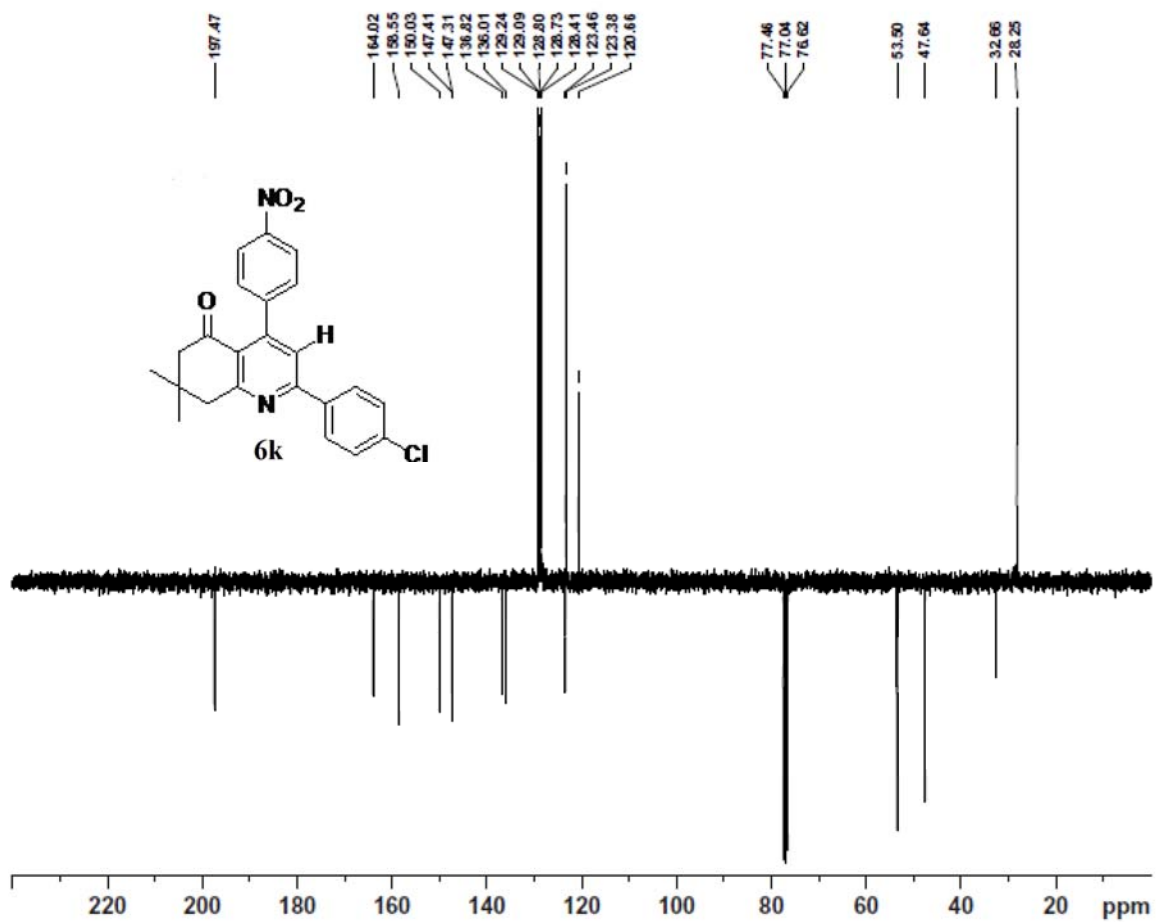

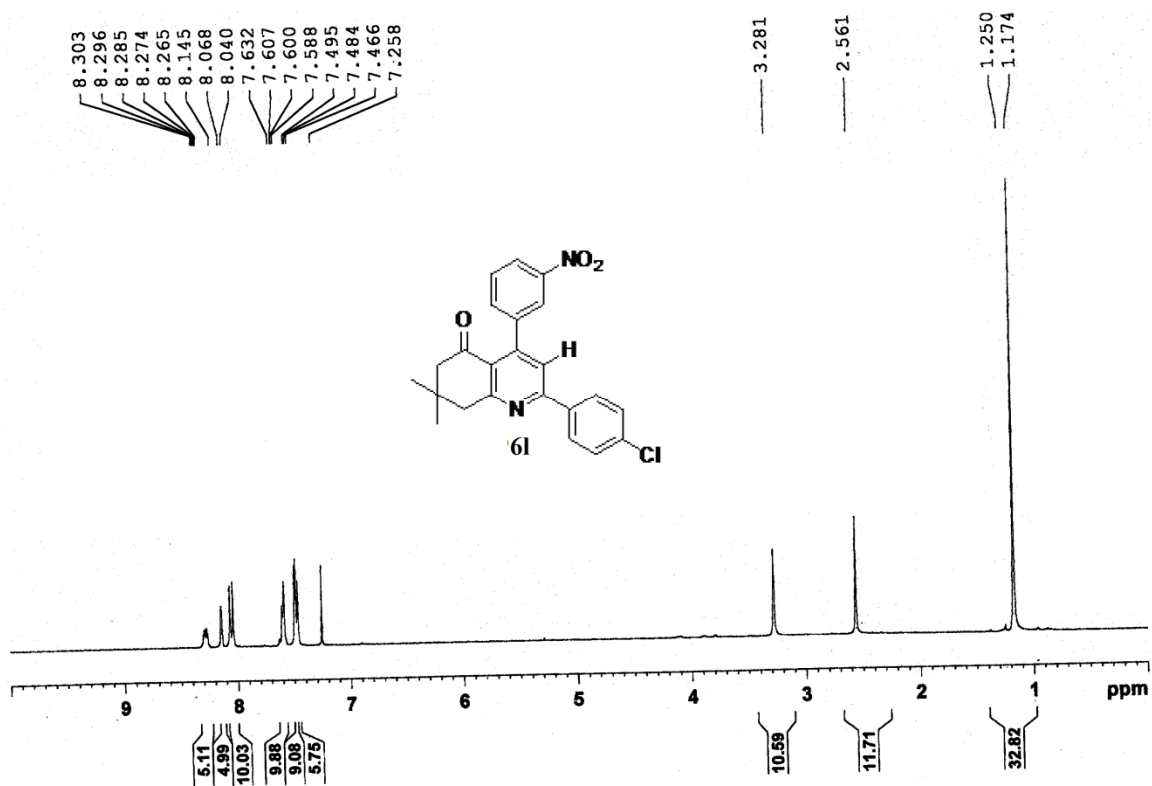

C13DEPTQ135-C

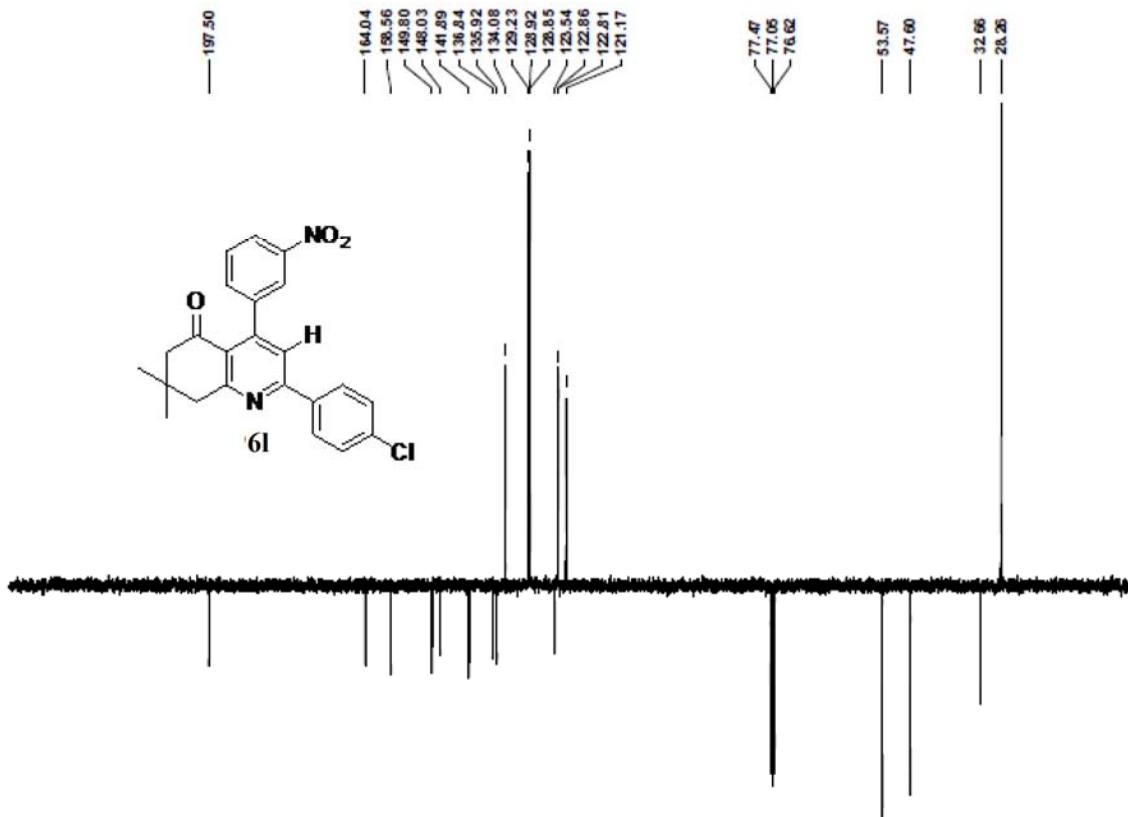

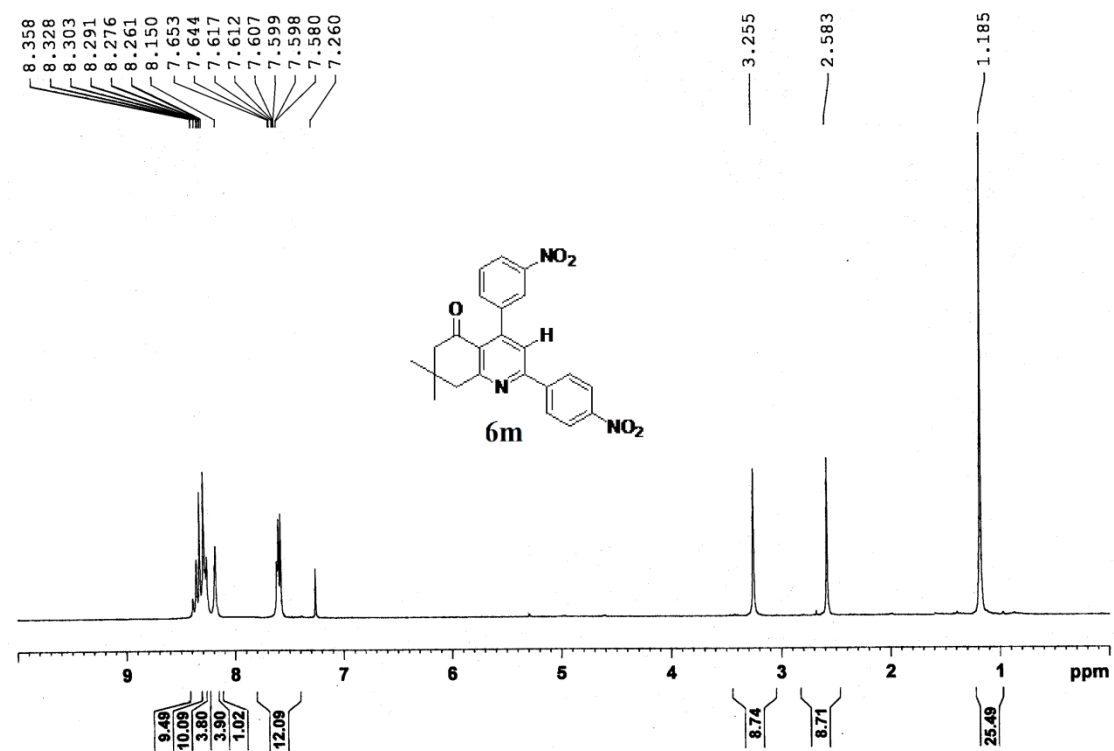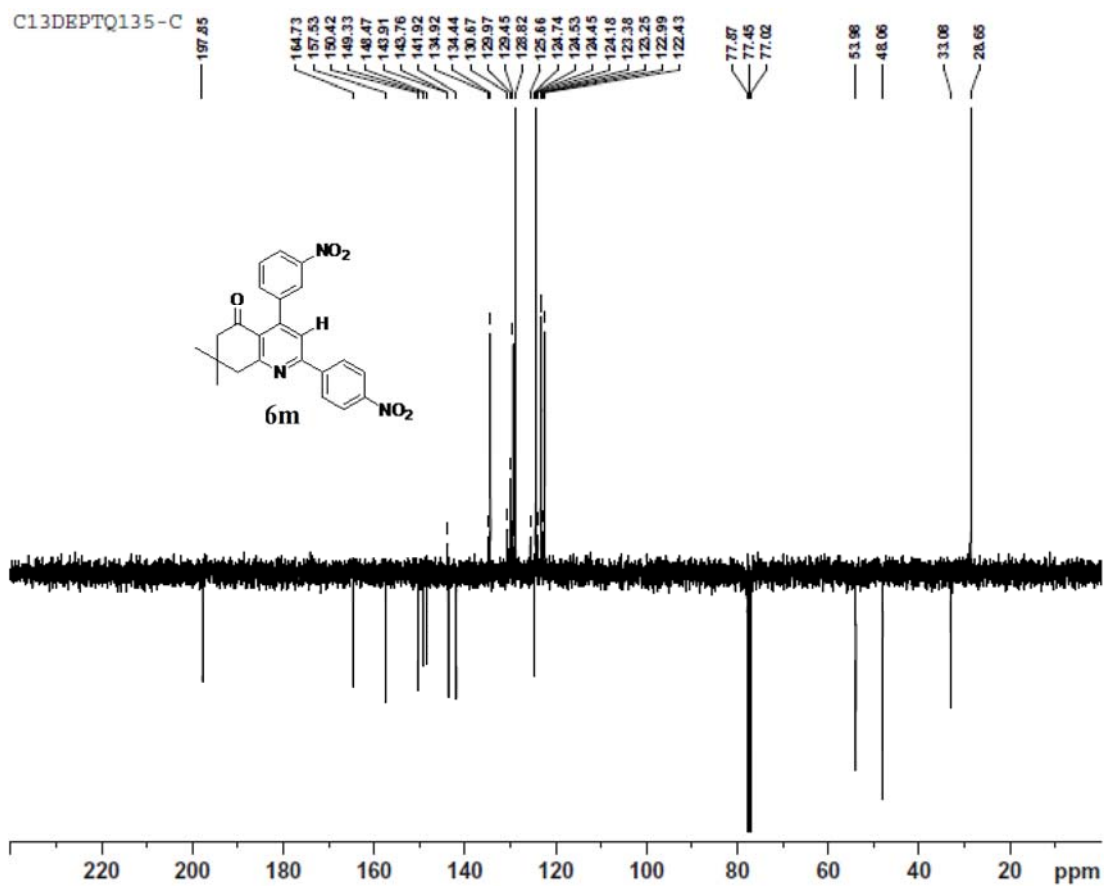



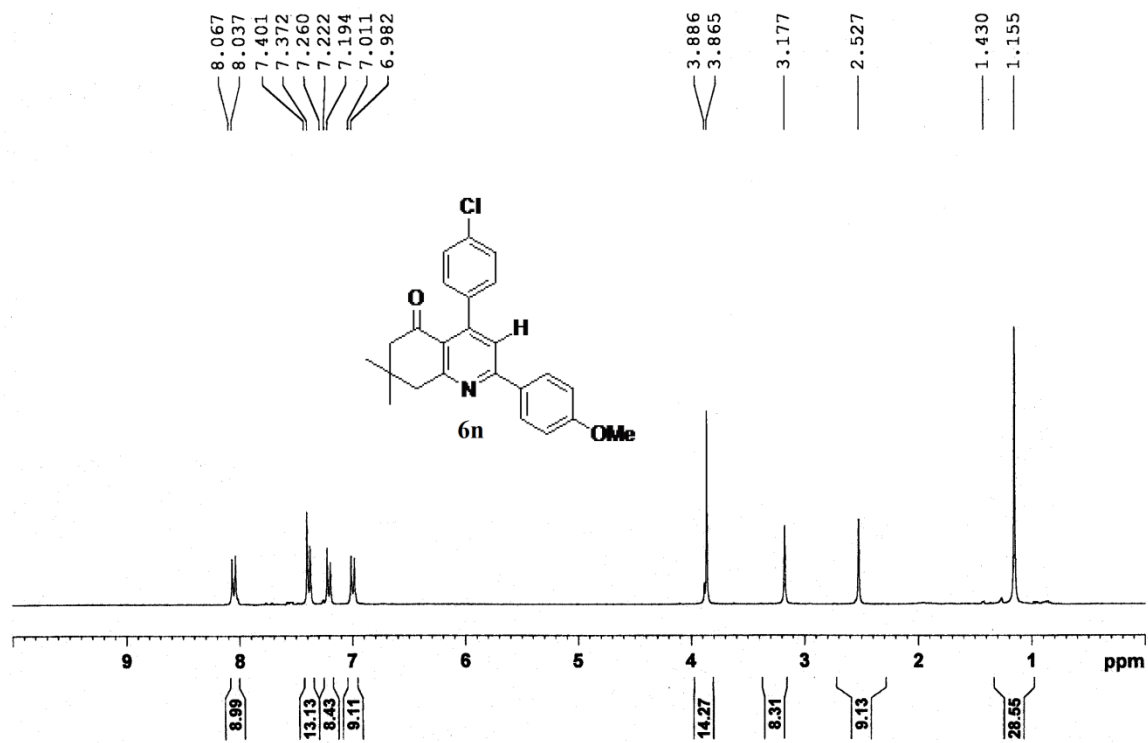

C13DEPTQ135-C

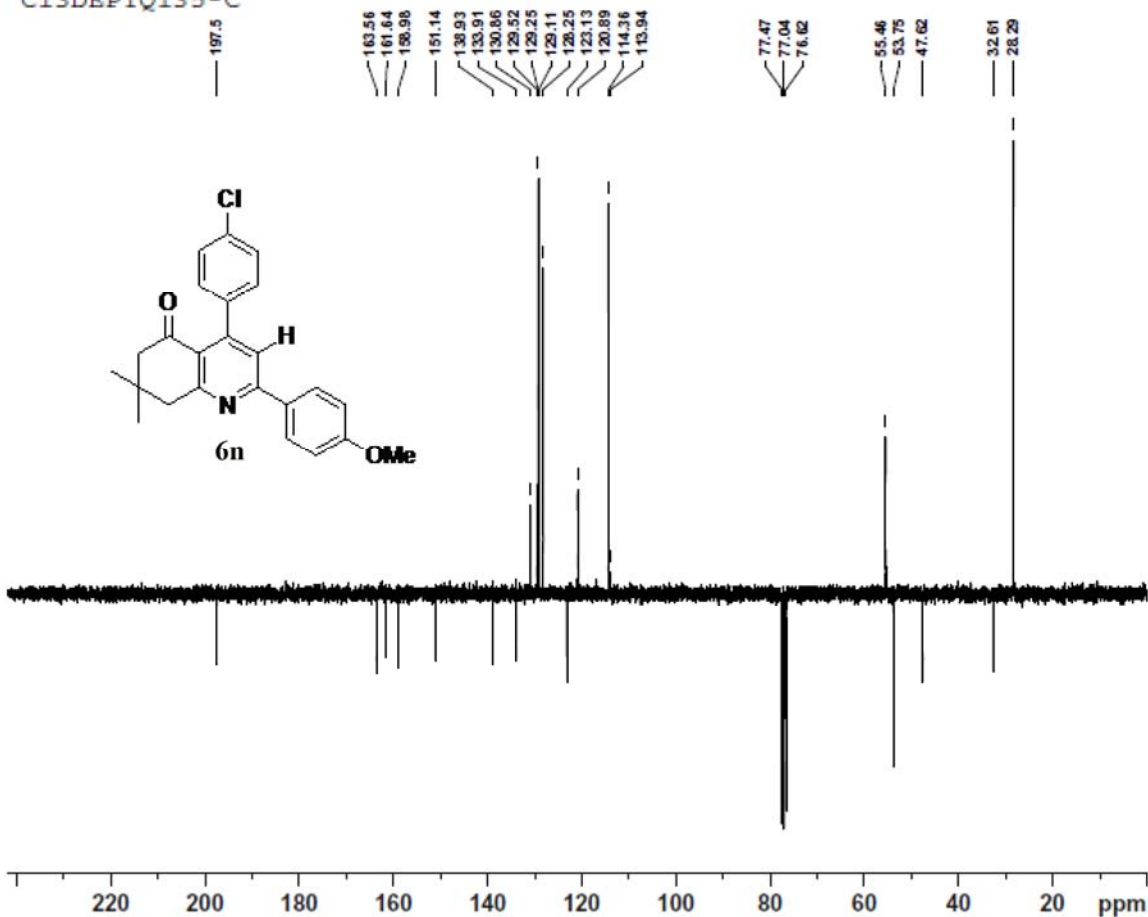

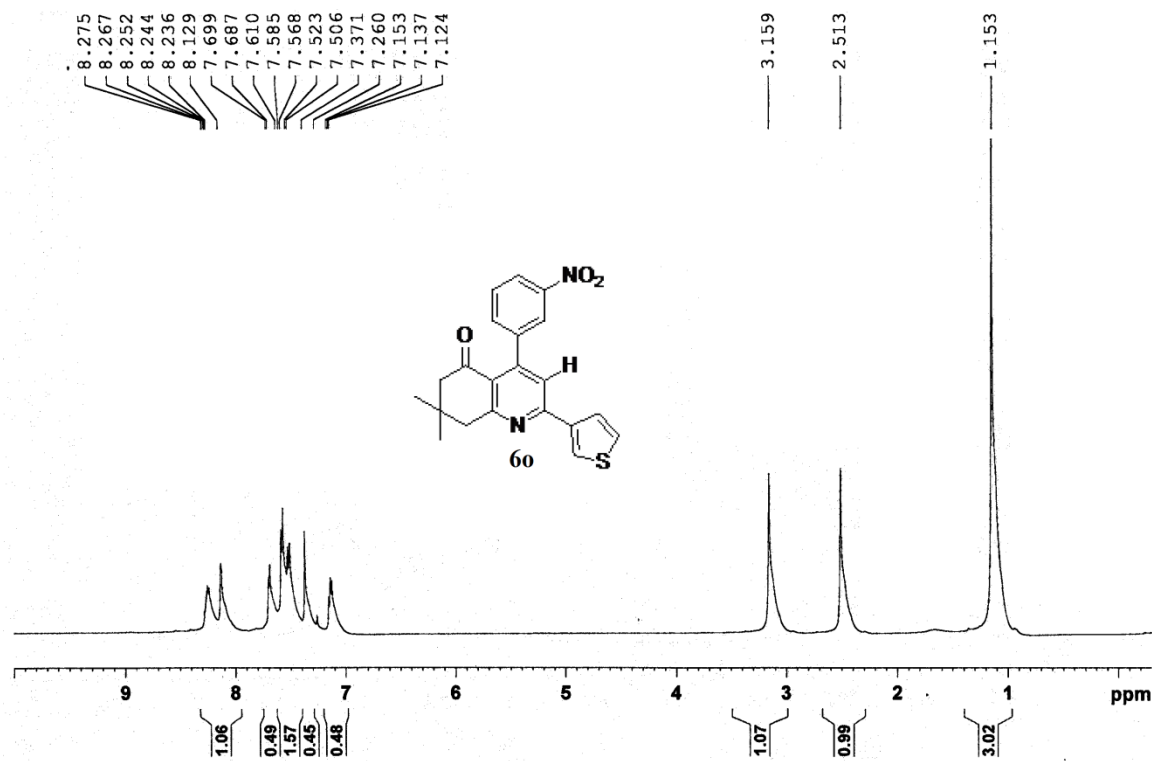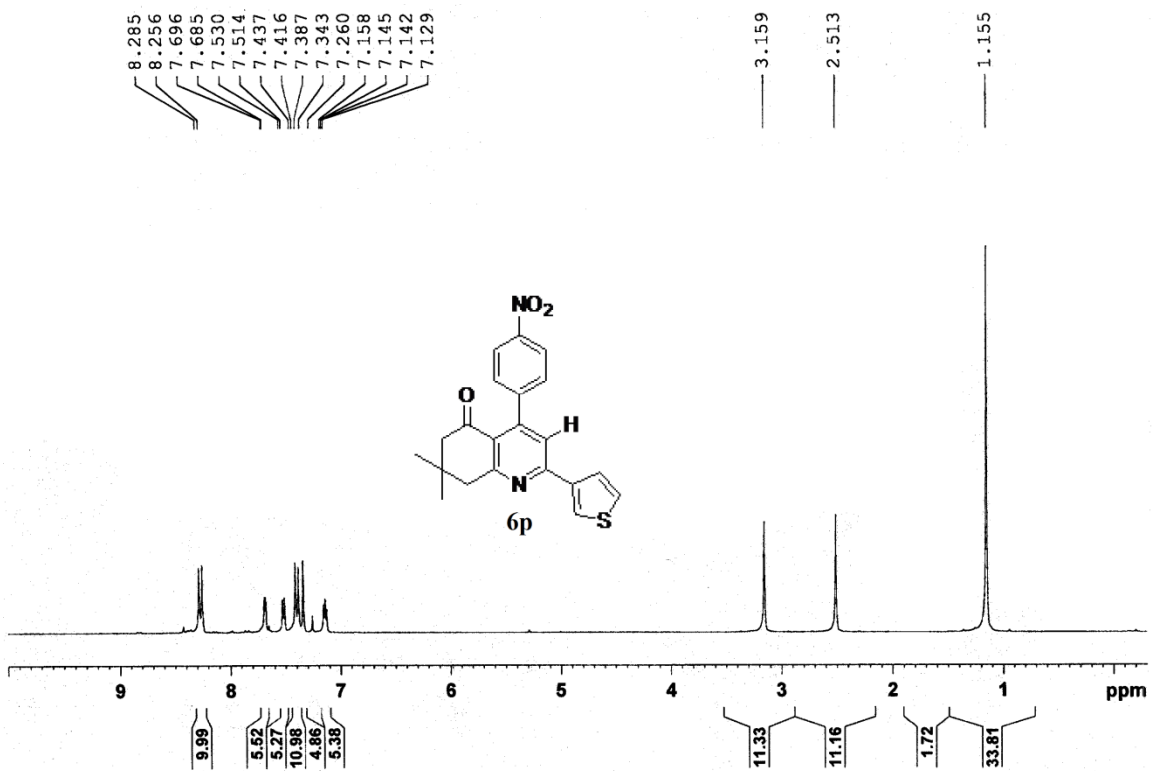

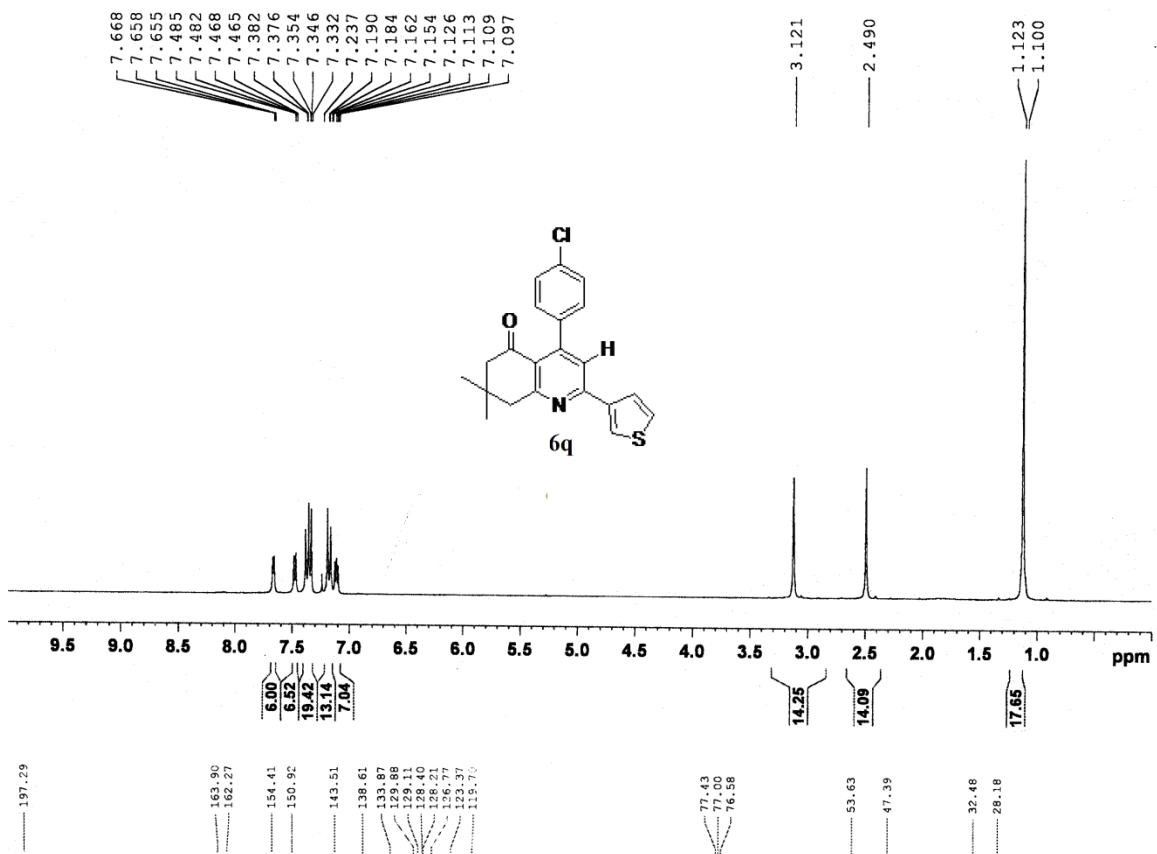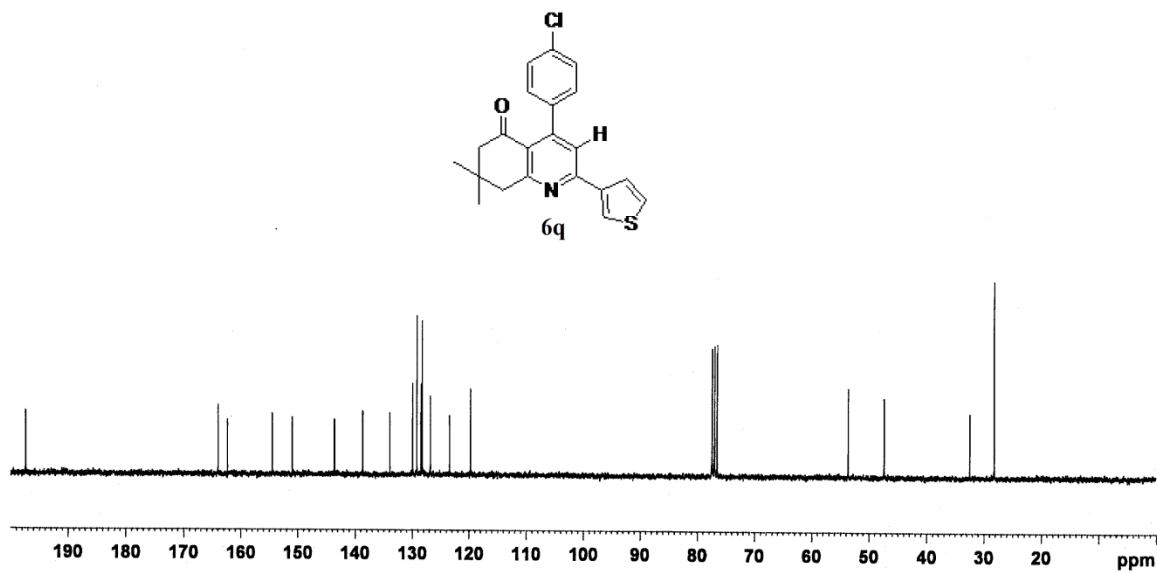

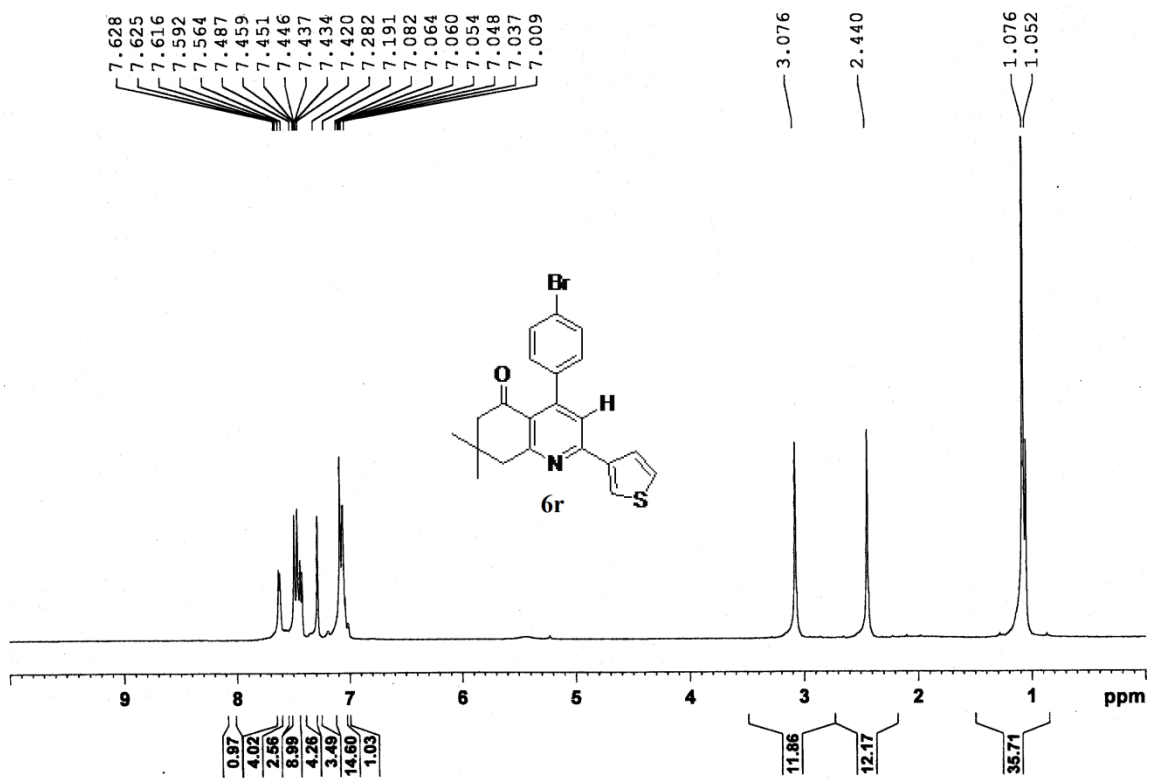

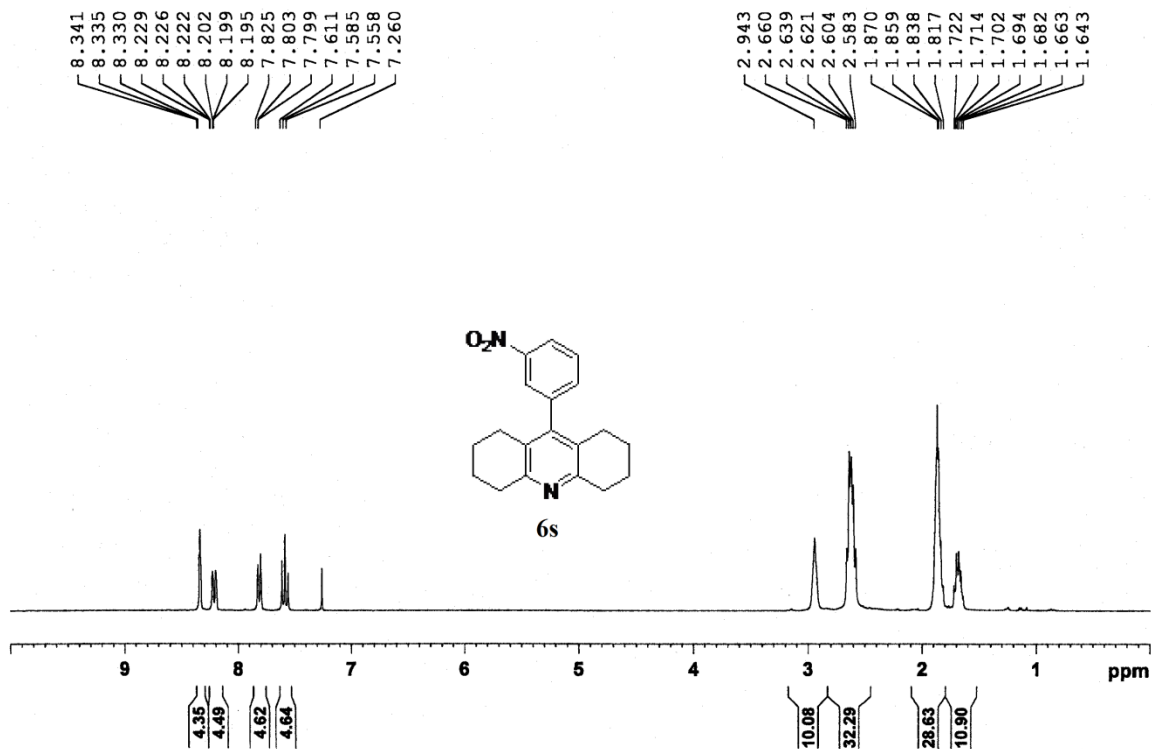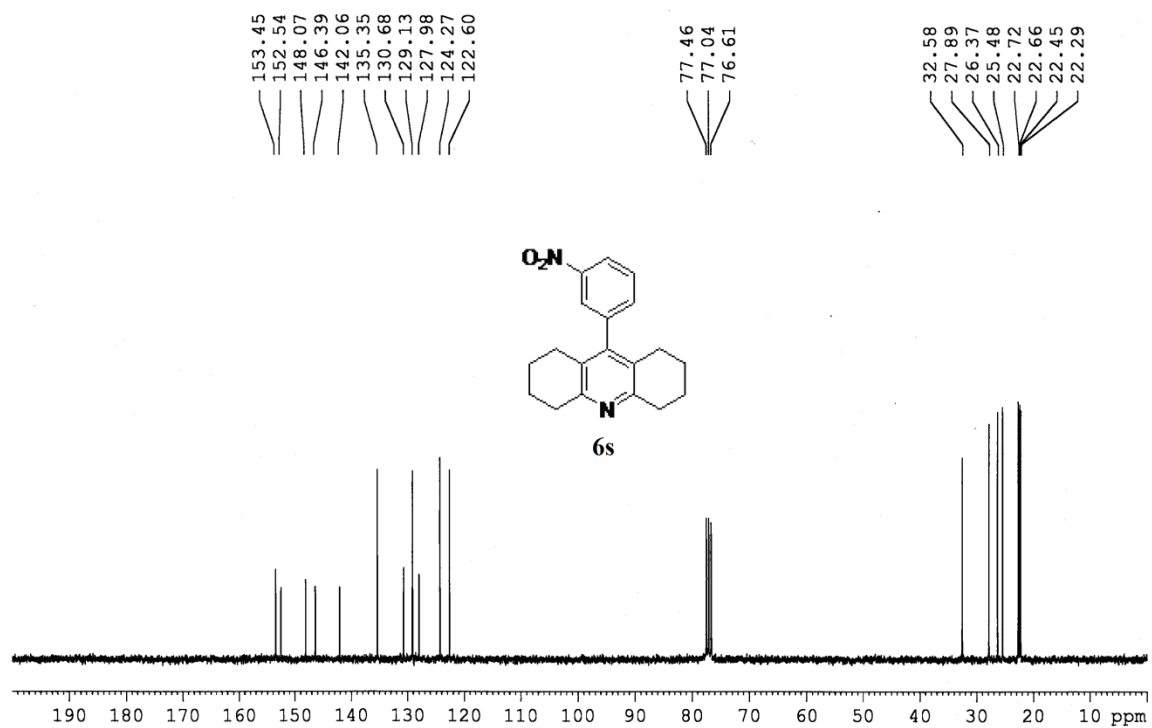

Supplement: c3gc40441b_2.pdf [file c3gc40441b_2.pdf]
