# Supplementary material for: A new MCM-41 supported HPF6 catalyst for the library synthesis of highly substituted 1,4-dihydropyridines and oxidation to pyridines: report of one-dimensional packing towards LMSOMs and studies on their photophysical properties
Source: Royal Society of Chemistry journal article supplement (doi:10.1039/c3gc40441b), 2013-01-01

## Supporting Information 3

# A new MCM-41 supported $\text{HPF}_6$ catalyst for the library synthesis of highly substituted 1,4-dihydropyridines and oxidation to pyridines: report of one-dimensional packing towards LMSOMs and studies on their photophysical properties

Suman Ray<sup>a</sup>, Mike Brown<sup>b</sup>, Asim Bhaumik<sup>c</sup>, Arghya Dutta<sup>c</sup> and Chhanda Mukhopadhyay<sup>a\*</sup>

*a: Department of Chemistry, University of Calcutta, 92 APC Road, Kolkata-700009, India*

*b: Bruker Bio Spin, 2700 Technology Forest Drive, Woodlands, Texas 77381, USA*

*c: Department of Materials Science, Indian Association for the Cultivation of Science, Jadavpur, Kolkata 700 032, India.*

[cmukhop@yahoo.co.in](mailto:cmukhop@yahoo.co.in)\*

### Table of Contents

|                                                                               |       |
|-------------------------------------------------------------------------------|-------|
| Spectroscopic characterization for <b>7a-7g</b> .....                         | 2-4   |
| <sup>1</sup> H NMR and <sup>13</sup> C NMR spectra for <b>7a-7g</b> .....     | 5-11  |
| Spectroscopic characterization for <b>14a-14i</b> .....                       | 12-16 |
| <sup>1</sup> H NMR and <sup>13</sup> C NMR spectra for <b>14a-14i</b> .....   | 17-25 |
| Spectroscopic characterization for <b>8b, 9, 10</b> .....                     | 26-27 |
| <sup>1</sup> H NMR and <sup>13</sup> C NMR spectra for <b>8b, 9, 10</b> ..... | 28-30 |

### Spectroscopic characterization for 7a-7g

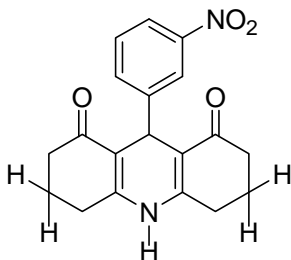

#### 3,4,6,7-tetrahydro-9-(3-nitrophenyl)acridine-1,8(2H,5H,9H,10H)-dione (7a):

White solid, mp 224-226 °C (CH<sub>2</sub>Cl<sub>2</sub> + EtOAc, equal volumes); IR  $\nu_{\max}$  (KBr) 3282, 3200, 2958, 1628, 1530, 1492, 1365, 1124, and 1146 cm<sup>-1</sup>; <sup>1</sup>H NMR (300 MHz, DMSO-D<sub>6</sub>)  $\delta$ : 9.61 (1H, s), 7.98-7.93 (2H, m), 7.61 (1H, d, J = 8.1 Hz), 7.49 (1H, d, J = 8.1 Hz), 5.00 (1H, s), 2.56-2.51 (4H, m), 2.25-2.20 (4H, m), 1.97-1.77 (4H, m); <sup>13</sup>C NMR (75 MHz, DMSO-D<sub>6</sub>)  $\delta$ : 194.9, 149.4, 147.5, 134.4, 129.4, 122.1, 120.7, 111.6, 36.7, 32.9, 26.3, 20.8; Anal. Calcd for C<sub>19</sub>H<sub>18</sub>N<sub>2</sub>O<sub>4</sub>: C, 67.44; H, 5.36; N, 8.28. Found C, 67.70; H, 5.41; N, 8.41.

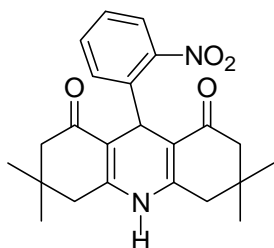

#### 3,4,6,7-tetrahydro-3,3,6,6-tetramethyl-9-(2-nitrophenyl)acridine-1,8(2H,5H,9H,10H)-dione (7b):

White solid, mp 194-196 °C (CH<sub>2</sub>Cl<sub>2</sub> + EtOAc, equal volumes); IR  $\nu_{\max}$  (KBr) 3280, 3200, 3072, 2958, 1633, 1530, 1490, 1365, and 1146 cm<sup>-1</sup>; <sup>1</sup>H NMR (300 MHz, CDCl<sub>3</sub>)  $\delta$ : 8.52 (1H, s), 7.69 (1H, d, J = 8.1 Hz), 7.47-7.46 (2H, m), 7.21-7.15 (1H, m), 5.84 (1H, s), 2.34-2.05 (8H, m), 1.00 (6H, s), 0.90 (6H, s); <sup>13</sup>C NMR (75 MHz, CDCl<sub>3</sub>)  $\delta$ : 193.5, 149.3, 147.5, 141.1, 131.9, 129.7, 125.9, 123.0, 110.5, 49.6, 31.4, 28.8, 28.2, 26.0; Anal. Calcd for C<sub>23</sub>H<sub>26</sub>N<sub>2</sub>O<sub>4</sub>: C, 70.03; H, 6.64; N, 7.10. Found C, 70.33; H, 6.70; N, 7.29.

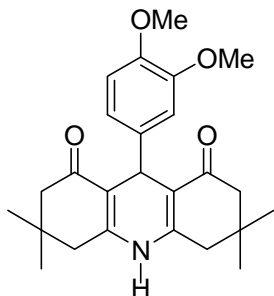

**3,4,6,7-tetrahydro-9-(3,4-dimethoxyphenyl)-3,3,6,6-tetramethylacridine-1,8(2H,5H,9H,10H)-dione**

(7c):

White solid, mp 214-216 °C (CH<sub>2</sub>Cl<sub>2</sub> + EtOAc, equal volumes); IR  $\nu_{\max}$  (KBr) 3273, 3199, 3068, 2950, 1641, 1610, 1482, 1365, and 1222 cm<sup>-1</sup>; <sup>1</sup>H NMR (300 MHz, CDCl<sub>3</sub>)  $\delta$ : 8.13 (1H, s), 6.91 (1H, s), 6.80 (1H, d, J = 8.1 Hz), 6.67-6.64 (1H, m), 5.02 (1H, s), 3.83 (1H, s), 3.74 (1H, s), 2.37-2.12 (8H, m), 1.05 (6H, s), 0.96 (6H, s); <sup>13</sup>C NMR (75 MHz, CDCl<sub>3</sub>)  $\delta$ : 193.8, 148.5, 147.4, 146.2, 139.4, 118.9, 111.4, 111.0, 110.7, 54.8, 49.7, 31.5, 28.6, 25.8; Anal. Calcd for C<sub>25</sub>H<sub>31</sub>NO<sub>4</sub>: C, 73.32; H, 7.63; N, 3.42. Found C, 73.60; H, 7.69; N, 3.55.

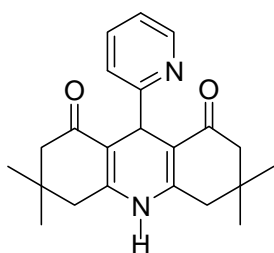

**3,4,6,7-tetrahydro-3,3,6,6-tetramethyl-9-(pyridin-2-yl)acridine-1,8(2H,5H,9H,10H)-dione (7d):**

Red solid, mp 284-286 °C (CH<sub>2</sub>Cl<sub>2</sub> + EtOAc, equal volumes); IR  $\nu_{\max}$  (KBr) 3288, 3072, 2960, 1634, 1530, 1490, 1365, 1124, and 1145 cm<sup>-1</sup>; <sup>1</sup>H NMR (300 MHz, DMSO-D<sub>6</sub>)  $\delta$ : 9.20 (1H, s), 8.30 (1H, d, J = 3.9 Hz), 7.55 (1H, d, J = 6.3 Hz), 7.30 (1H, d, J = 7.5 Hz), 7.03 (1H, d, J = 5.1 Hz), 4.96 (1H, s), 2.50-1.92 (8H, m), 1.00 (6H, s), 0.87 (6H, s); <sup>13</sup>C NMR (75 MHz, DMSO-D<sub>6</sub>)  $\delta$ : 193.8, 163.3, 149.4, 147.9, 134.5, 122.4, 120.6, 109.8, 49.7, 34.9, 31.6, 28.6, 25.6; Anal. Calcd for C<sub>22</sub>H<sub>26</sub>N<sub>2</sub>O<sub>2</sub>: C, 75.40; H, 7.48; N, 7.99. Found C, 75.21; H, 7.51; N, 8.09.

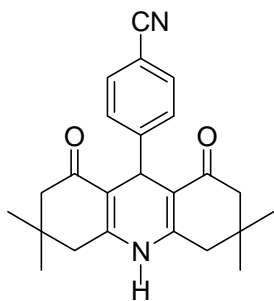

**4-(1,2,3,4,5,6,7,8,9,10-decahydro-3,3,6,6-tetramethyl-1,8-dioxoacridin-9-yl)benzotrile (7e):**

Yellowish white solid, mp 194-196 °C (CH<sub>2</sub>Cl<sub>2</sub> + EtOAc, equal volumes); IR  $\nu_{\max}$  (KBr) 3208, 3072, 2958, 1633, 1530, 1490, 1365, 1124, and 1141cm<sup>-1</sup>; <sup>1</sup>H NMR (300 MHz, DMSO-D<sub>6</sub>)  $\delta$ : 9.45 (1H, s), 7.65 (2H, d,

$J = 8.1$  Hz), 7.34 (2H, d,  $J = 8.1$  Hz), 4.86 (1H, s), 2.56-1.96 (8H, m), 1.06 (6H, s), 0.89 (6H, s);  $^{13}\text{C}$  NMR (75 MHz, DMSO- $\text{D}_6$ )  $\delta$ : 193.7, 151.8, 149.2, 131.3, 128.6, 128.1, 118.4, 109.9, 107.7, 49.5, 33.2, 31.5, 28.4, 25.9; Anal. Calcd for  $\text{C}_{24}\text{H}_{26}\text{N}_2\text{O}_2$ : C, 76.98; H, 7.00; N, 7.48. Found C, 76.70; H, 7.09; N, 7.36.

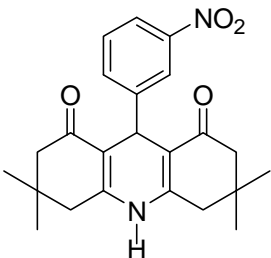

**3,4,6,7-tetrahydro-3,3,6,6-tetramethyl-9-(3-nitrophenyl)acridine-1,8(2H,5H,9H,10H)-dione (7f):**

Yellowish white solid, mp 212-214 °C ( $\text{CH}_2\text{Cl}_2$  + EtOAc, equal volumes); IR  $\nu_{\text{max}}$  (KBr) 3288, 3160, 3078, 2958, 1634, 1530, 1490, 1365, and 1124  $\text{cm}^{-1}$ ;  $^1\text{H}$  NMR (300 MHz,  $\text{CDCl}_3$ )  $\delta$ : 8.00 (1H, s), 7.89 (1H, d,  $J = 7.5$  Hz), 7.74 (1H, d,  $J = 7.5$  Hz), 7.48 (1H, d,  $J = 8.1$  Hz), 5.09 (1H, s), 2.39-2.09 (8H, m), 1.04 (6H, s), 0.91 (6H, s); Anal. Calcd for  $\text{C}_{23}\text{H}_{26}\text{N}_2\text{O}_4$ : C, 70.03; H, 6.64; N, 7.10. Found C, 70.28; H, 6.55; N, 7.01.

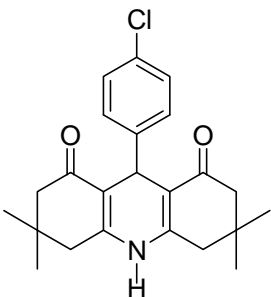

**3,4,6,7-tetrahydro-3,3,6,6-tetramethyl-9-(4-chlorophenyl)acridine-1,8(2H,5H,9H,10H)-dione (7g):**

Yellowish white solid, mp 292-294 °C ( $\text{CH}_2\text{Cl}_2$  + EtOAc, equal volumes); IR  $\nu_{\text{max}}$  (KBr) 3268, 3162, 3072, 2944, 1631, 1528, 1490, and 1120  $\text{cm}^{-1}$ ;  $^1\text{H}$  NMR (300 MHz, DMSO- $\text{D}_6$ )  $\delta$ : 9.26 (1H, s), 7.13 (2H, d,  $J = 8.4$  Hz), 7.07 (2H, d,  $J = 8.4$  Hz), 4.70 (1H, s), 2.41-1.87 (8H, m), 0.92 (6H, s), 0.77 (6H, s);  $^{13}\text{C}$  NMR (75 MHz, DMSO- $\text{D}_6$ )  $\delta$ : 194.8, 149.9, 146.6, 130.4, 129.9, 128.0, 111.5, 50.6, 33.2, 32.6, 29.5, 26.9; Anal. Calcd for  $\text{C}_{23}\text{H}_{26}\text{ClNO}_2$ : C, 71.96; H, 6.83; N, 3.65. Found C, 72.14; H, 7.01; N, 3.49.

### <sup>1</sup>H NMR and <sup>13</sup>C NMR spectra for 7a-7g

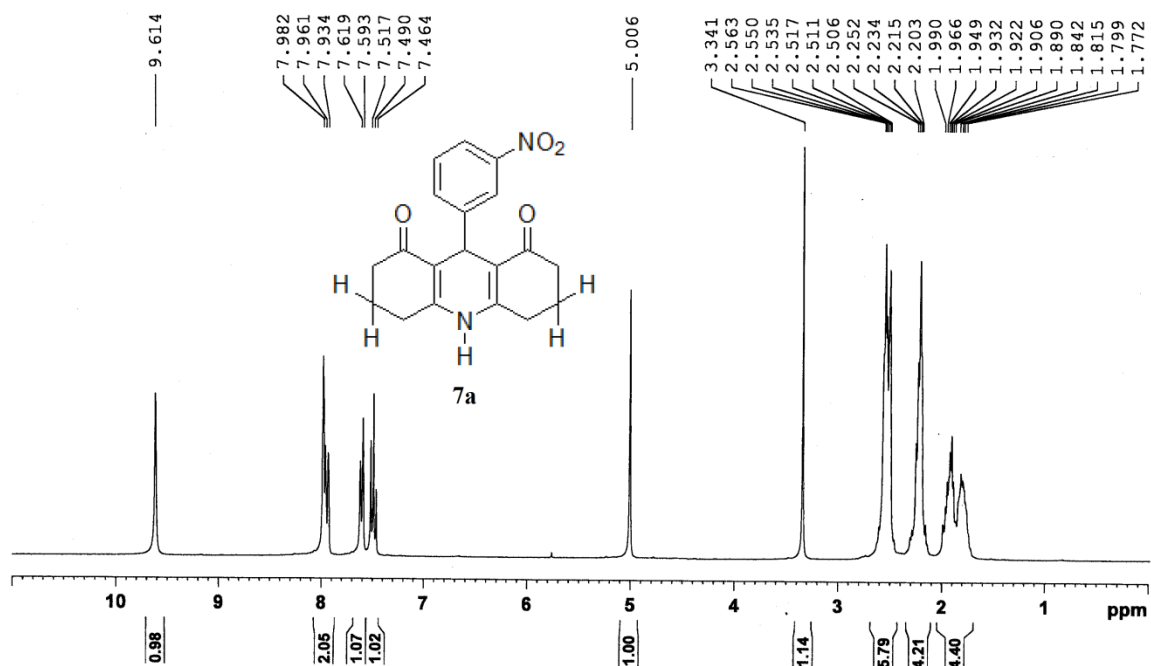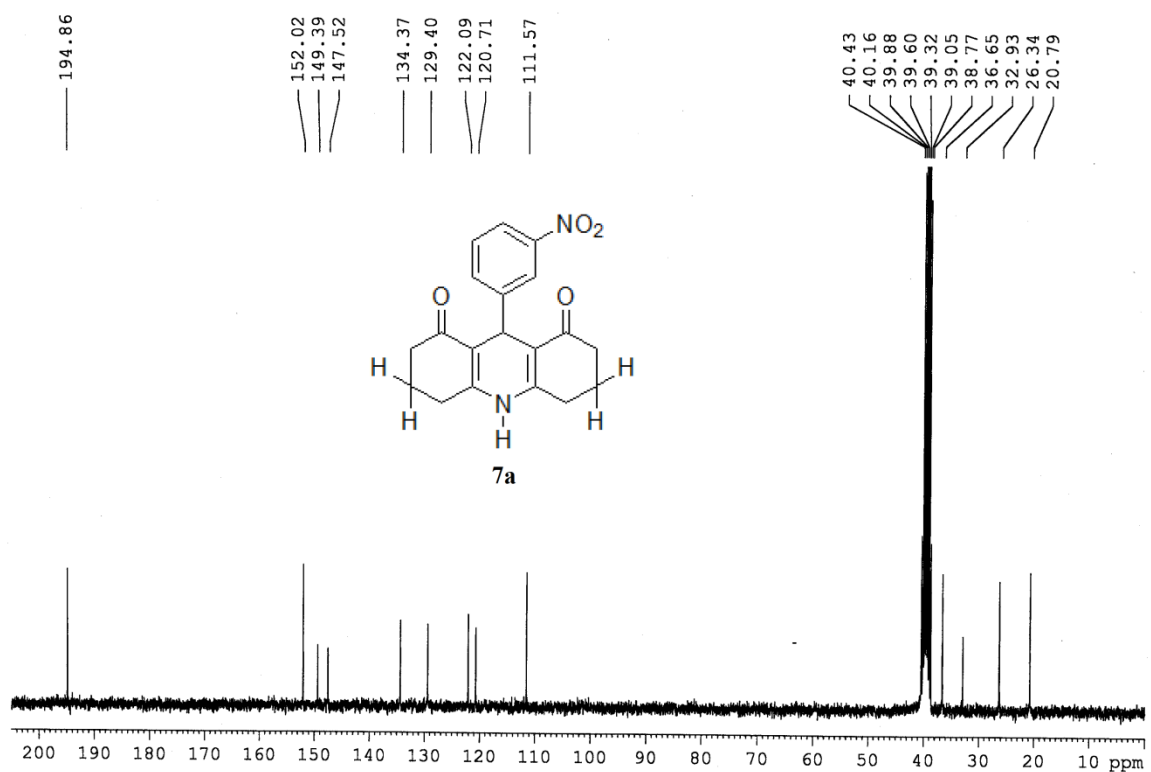

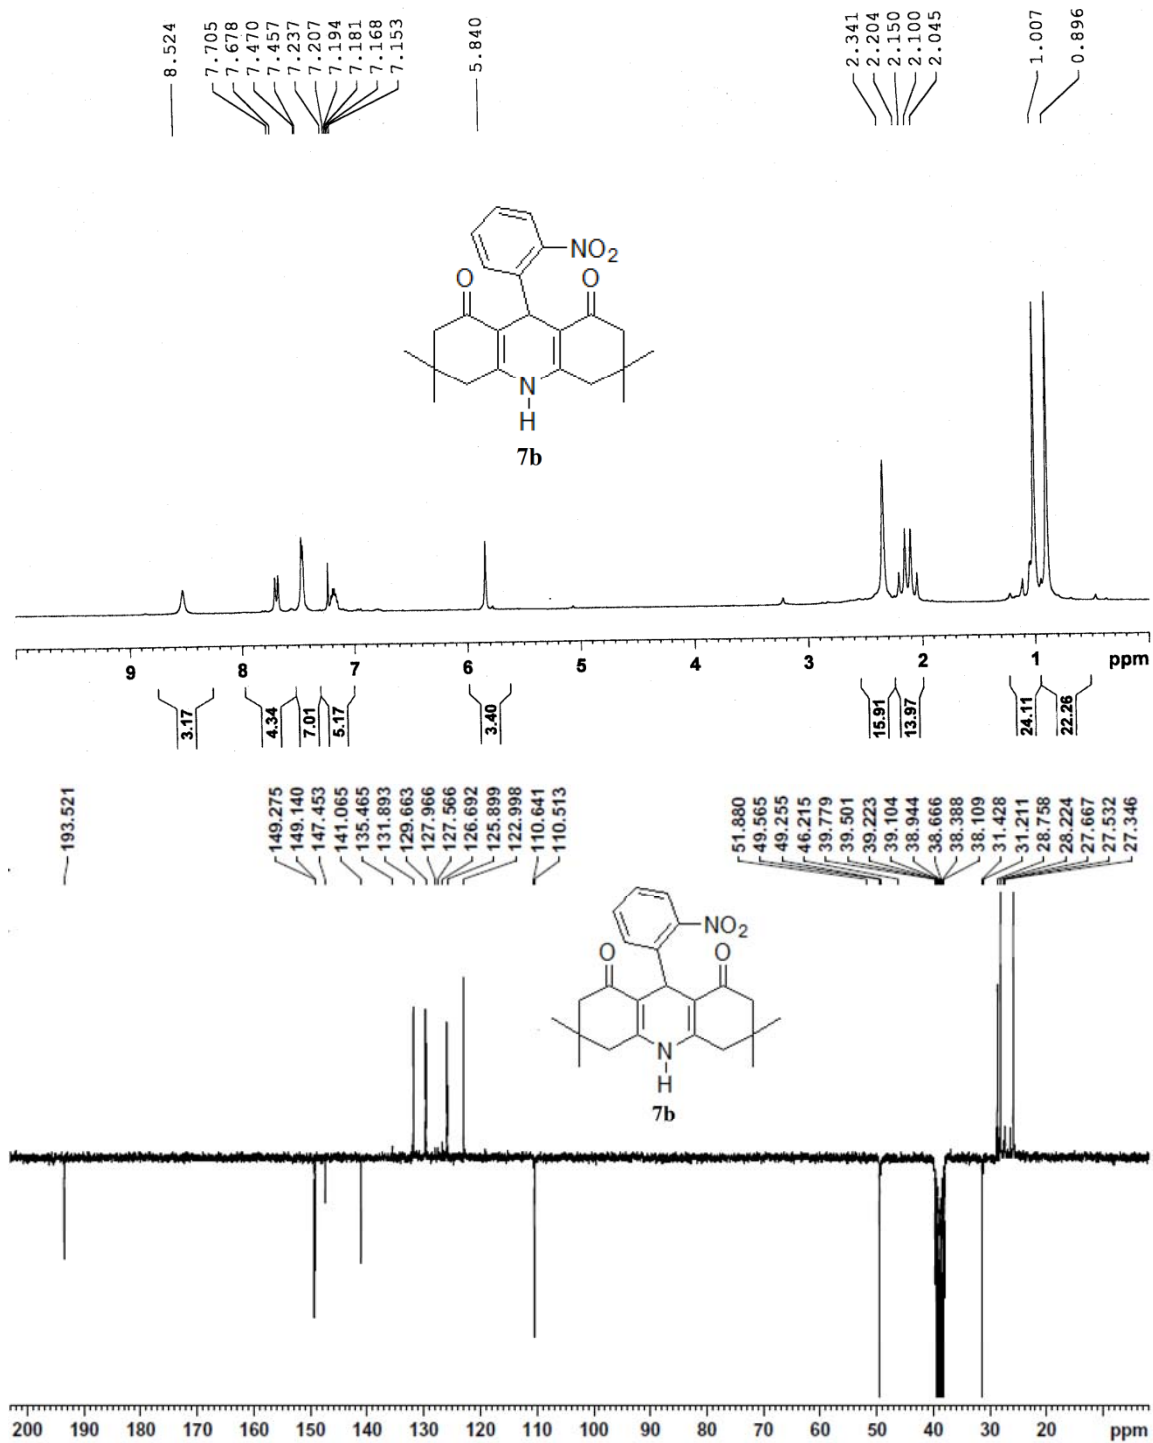

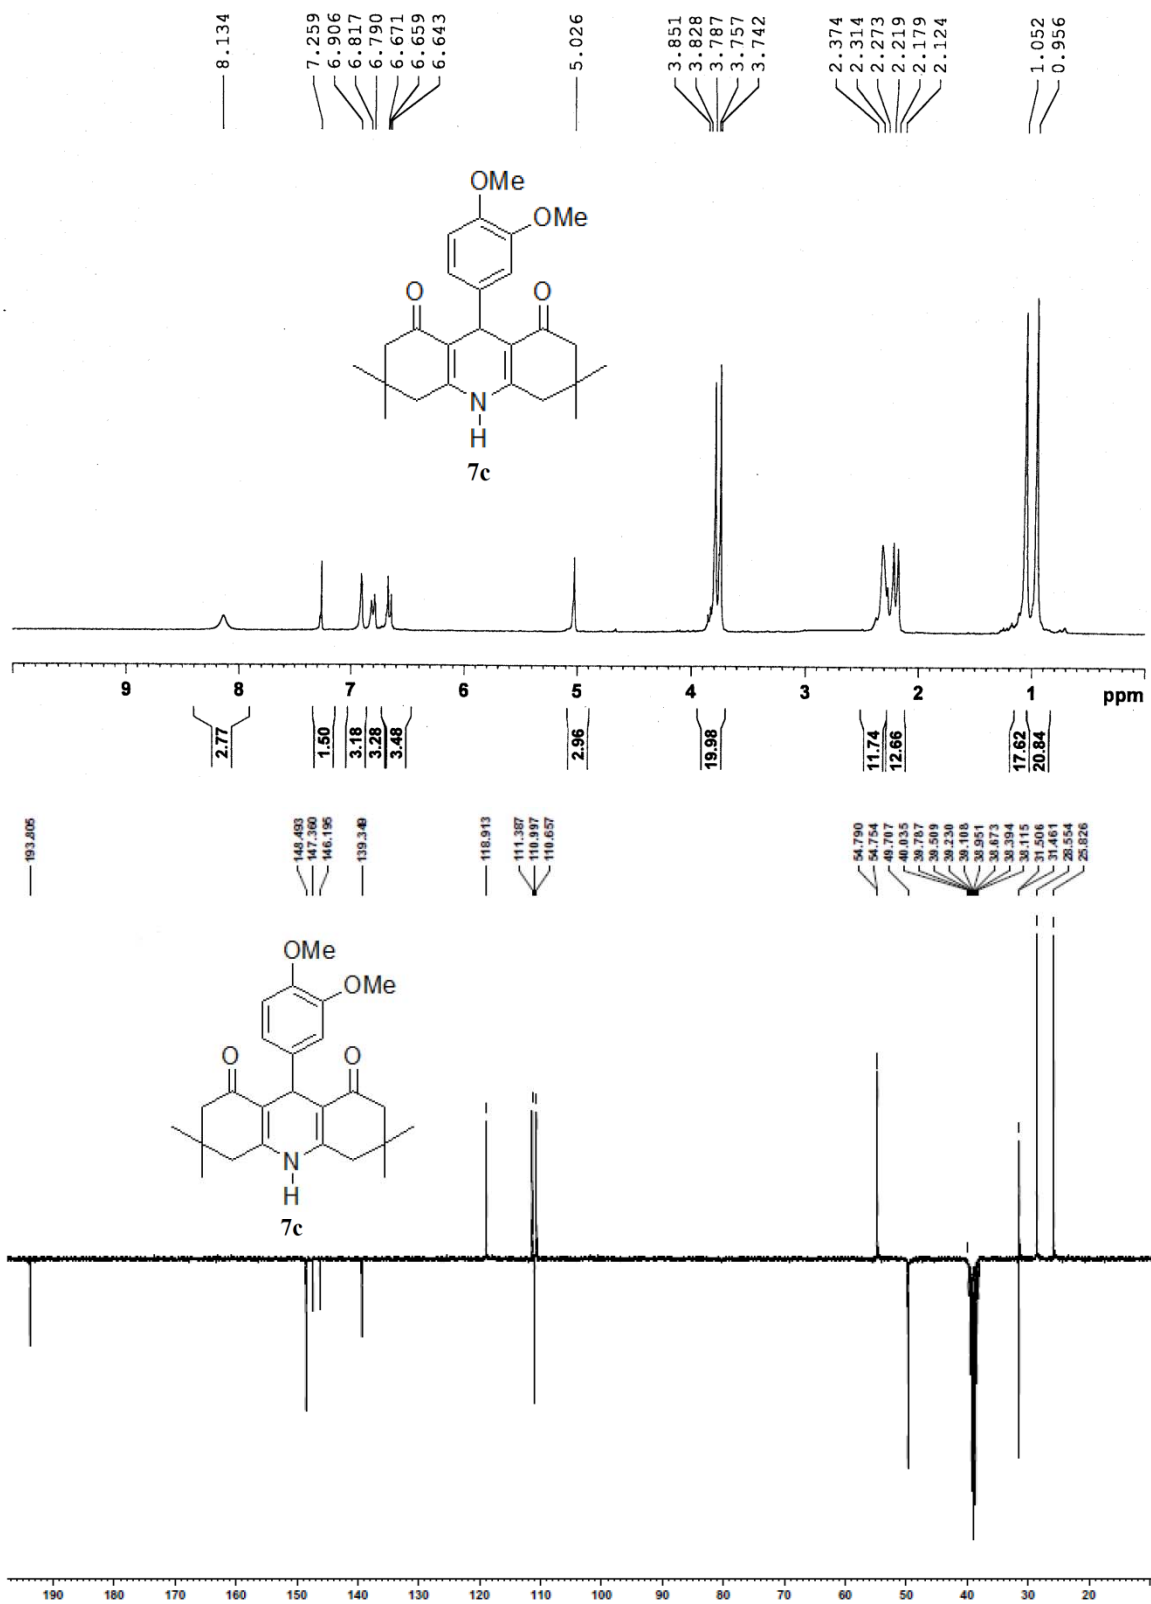

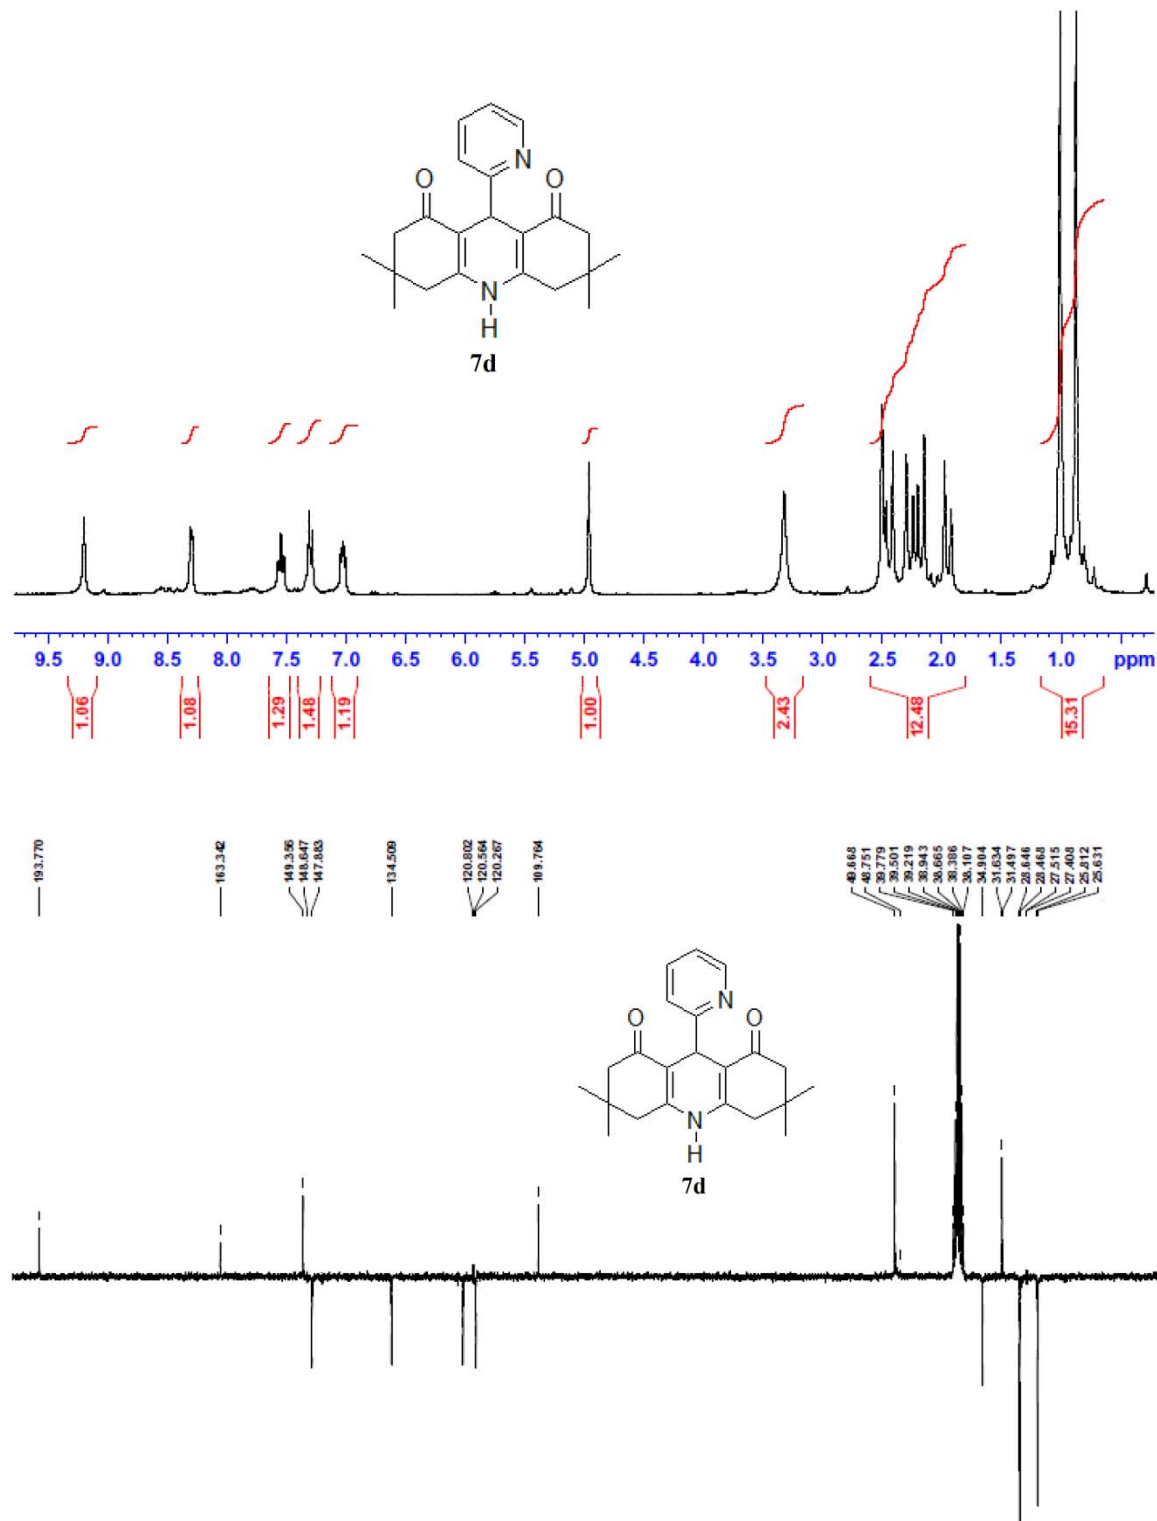



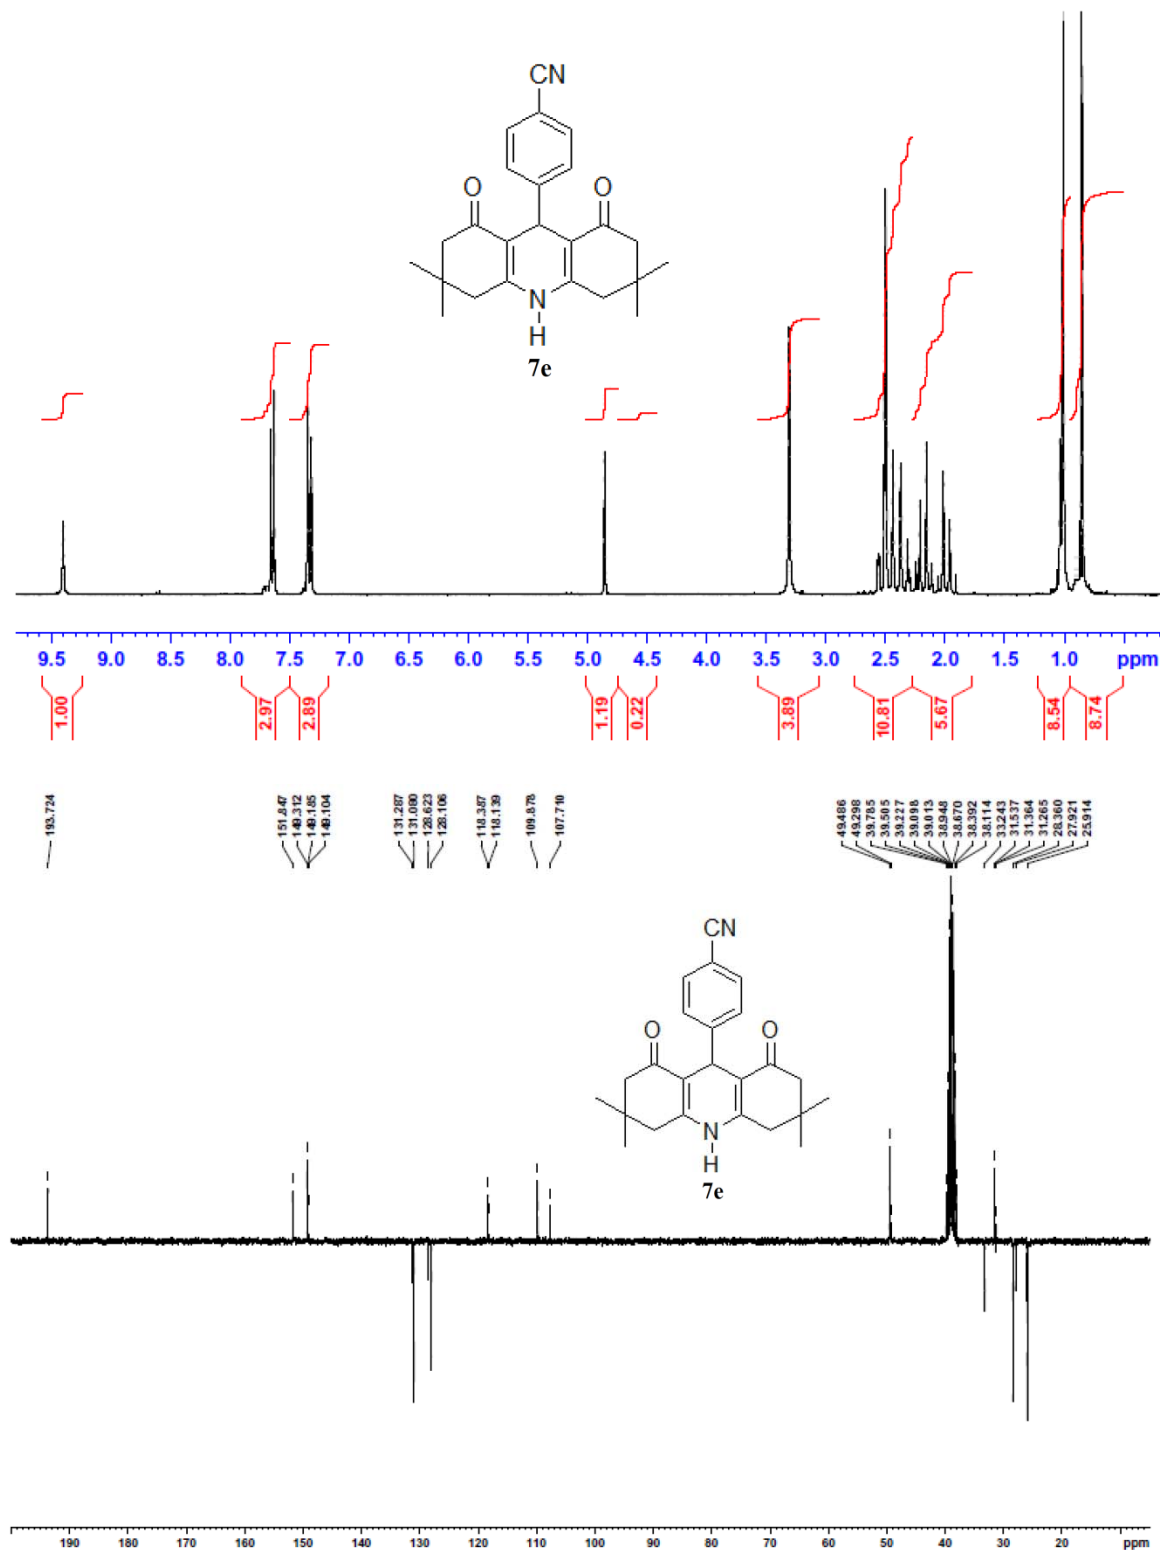

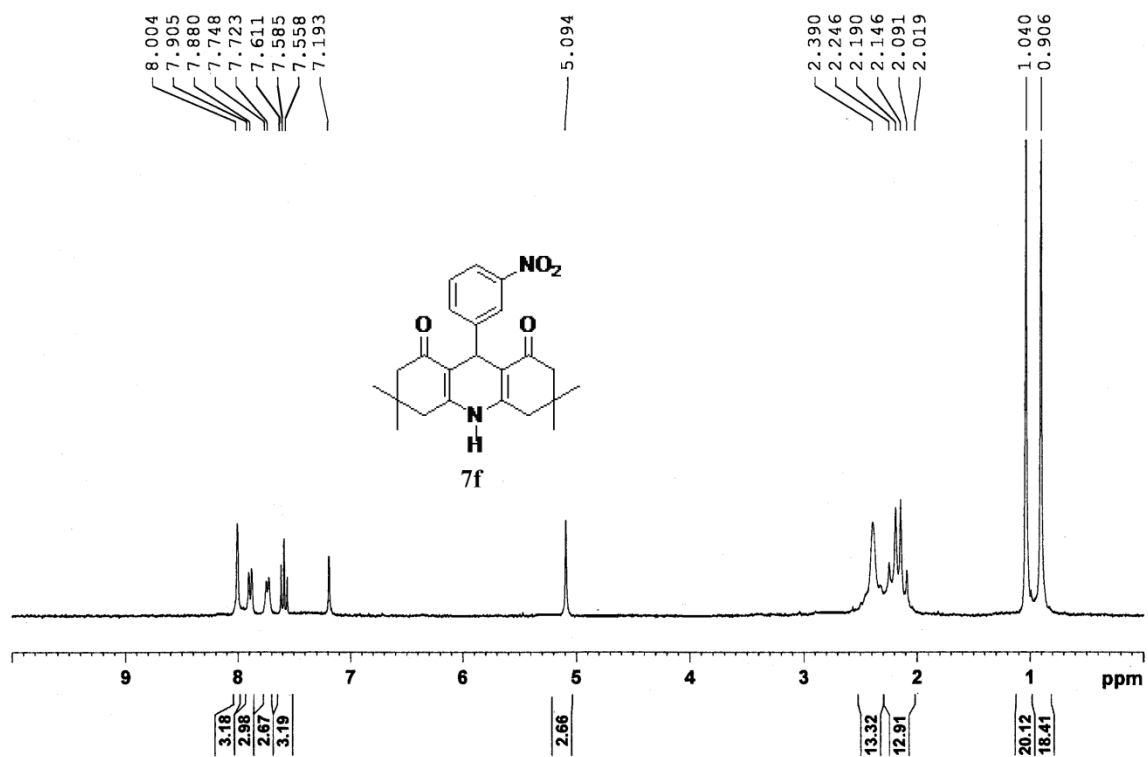

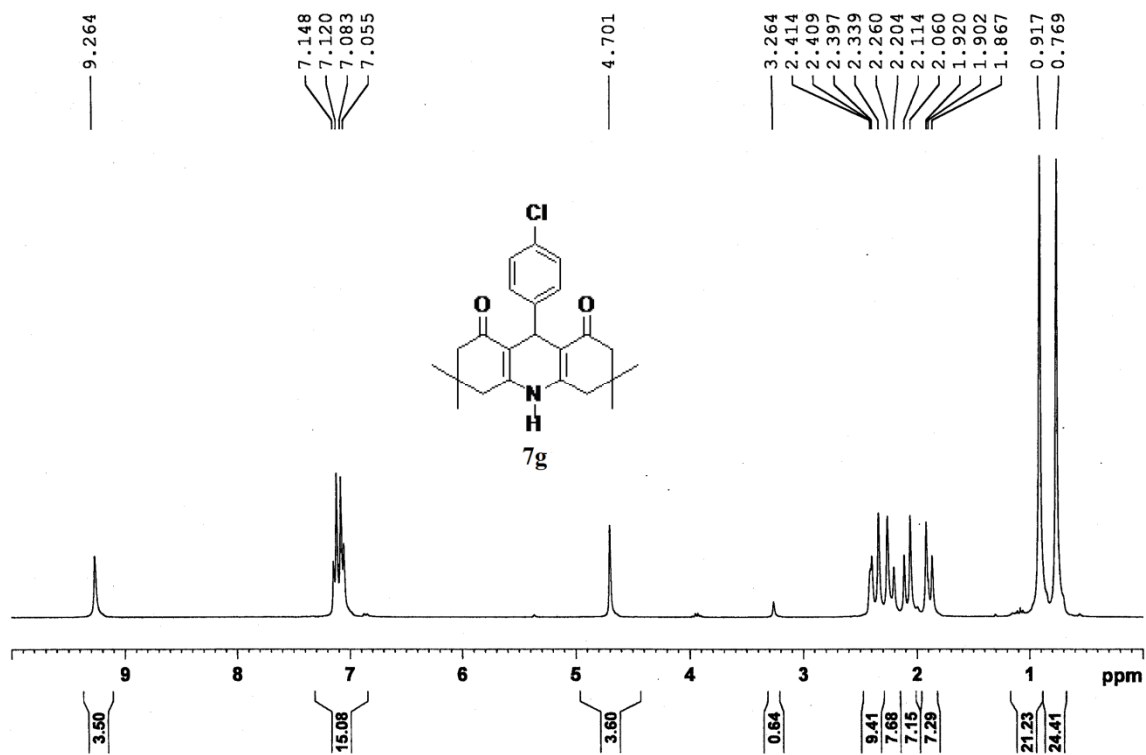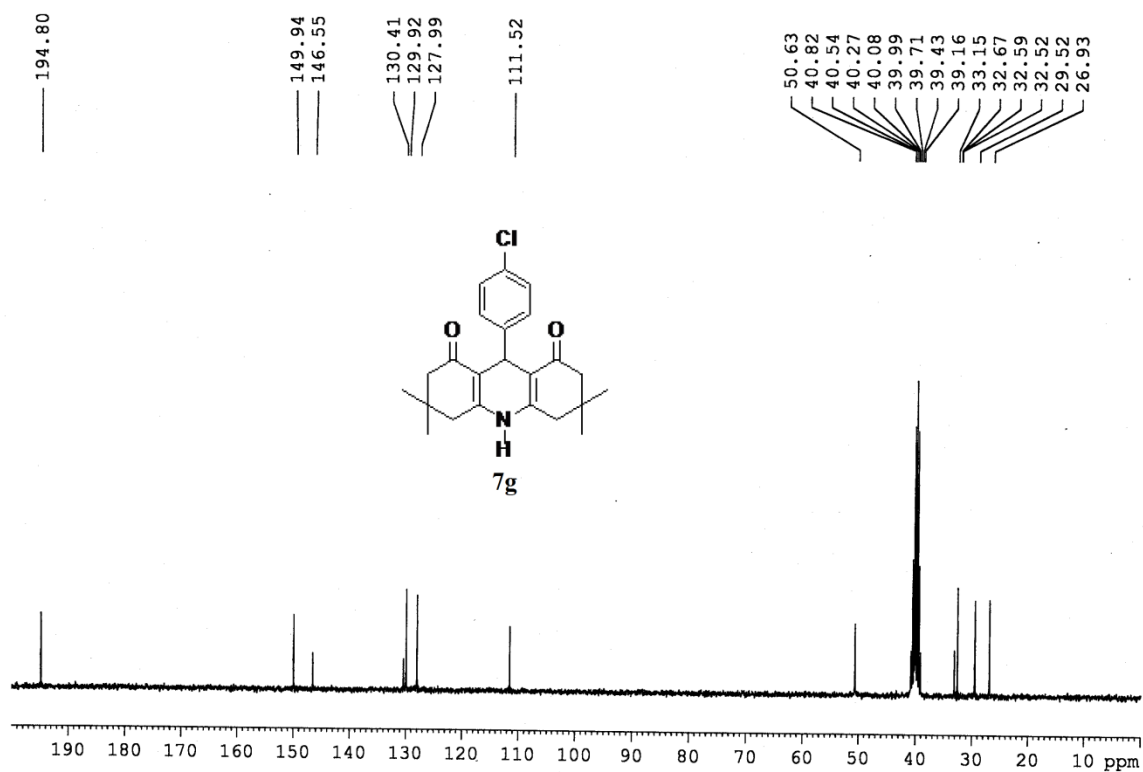

## Spectroscopic characterization for 14a-14i

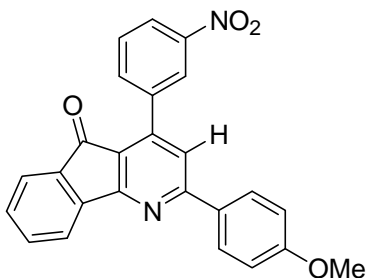

### 2-(4-methoxyphenyl)-4-(3-nitrophenyl)-5H-indeno[1,2-b]pyridin-5-one (14a):

Yellowish green solid, mp 234-236 °C; IR  $\nu_{\max}$  (KBr) 3432, 2375, 1705, 1551, and 1346  $\text{cm}^{-1}$ ;  $^1\text{H}$  NMR (300 MHz,  $\text{CDCl}_3$ )  $\delta$ : 8.54 (1H, s, arom), 8.35 (1H, d,  $J = 7.2$  Hz), 8.24-8.19 (2H, m, arom), 8.04 (2H, d,  $J = 9.0$  Hz, arom), 7.79 (1H, s, arom), 7.72-7.66 (4H, m, arom), 7.53 (1H, s, arom), 7.05 (2H, d,  $J = 9.8$  Hz), 3.91 (3H, s,  $-\text{OCH}_3$ );  $^{13}\text{C}$  NMR (75 MHz,  $\text{CDCl}_3$ )  $\delta$ : 190.8, 166.6, 161.8, 161.4, 148.2, 146.5, 137.1, 135.4, 135.3, 135.0, 131.2, 130.4, 129.0, 124.1, 124.0, 123.8, 121.8, 121.1, 119.4, 114.4; Anal. Calcd for  $\text{C}_{25}\text{H}_{16}\text{N}_2\text{O}_4$ : C, 73.52; H, 3.95; N, 6.86. Found C, 73.81; H, 3.87; N, 7.01.

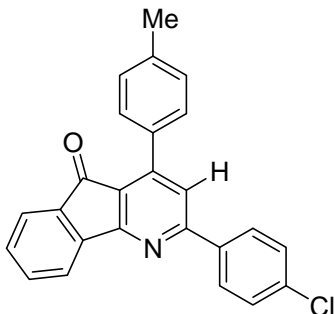

### 2-(4-chlorophenyl)-4-p-tolyl-5H-indeno[1,2-b]pyridin-5-one (14b):

Yellowish green solid, mp 188-190 °C; IR  $\nu_{\max}$  (KBr) 3423, 3054, 2370, 1712, 1560, and 1363  $\text{cm}^{-1}$ ;  $^1\text{H}$  NMR (300 MHz,  $\text{CDCl}_3$ )  $\delta$ : 8.12 (2H, d,  $J = 8.4$  Hz), 7.98 (1H, t,  $J = 8.4$  Hz, arom), 7.78-7.45 (6H, m, arom), 7.35-7.31 (2H, m, arom), 7.26 (1H, s, arom), 2.46 (3H, m,  $-\text{CH}_3$ ); Anal. Calcd for  $\text{C}_{25}\text{H}_{16}\text{ClNOC}$ , 78.63; H, 4.22; N, 3.67. Found C, 78.82; H, 4.30; N, 3.87.

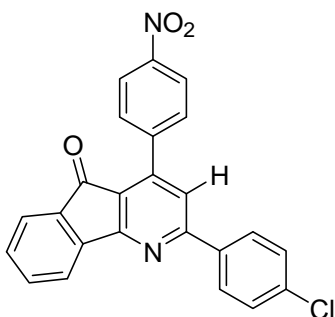

**2-(4-chlorophenyl)-4-(4-nitrophenyl)-5H-indeno[1,2-b]pyridin-5-one (14c):**

Yellow solid, mp 214-216 °C; IR  $\nu_{\max}$  (KBr) 3434, 1718, 1582, and 1512  $\text{cm}^{-1}$ ;  $^1\text{H}$  NMR (300 MHz,  $\text{CDCl}_3$ )  $\delta$ : 8.40-8.36 (2H, m, arom), 8.14 (2H, d,  $J = 8.4$  Hz), 7.90-7.80 (3H, m, arom), 7.72-7.60 (2H, m, arom), 7.52-7.48 (4H, m, arom), 7.72-7.66 (4H, m, arom), 7.53 (1H, s, arom), 7.05 (2H, d,  $J = 9.8$  Hz);  $^{13}\text{C}$  NMR (75 MHz,  $\text{CDCl}_3$ )  $\delta$ : 191.1, 160.40, 156.9, 146.9, 142.7, 141.6, 137.2, 136.8, 136.2, 135.8, 135.3, 131.5, 130.1, 129.2, 129.1, 129.0, 128.7, 128.4, 128.2, 124.4, 124.0, 123.5, 121.2, 120.2, 116.9; Anal. Calcd for  $\text{C}_{24}\text{H}_{13}\text{ClN}_2\text{O}_3$ : C, 69.83; H, 3.17; N, 6.79. Found C, 69.61; H, 3.20; N, 6.91.

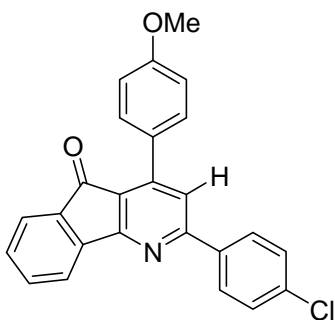

**2-(4-chlorophenyl)-4-(4-methoxyphenyl)-5H-indeno[1,2-b]pyridin-5-one (14d):**

Yellow solid, mp 204-206 °C; IR  $\nu_{\max}$  (KBr) 3434, 1710, 1581 and 1512  $\text{cm}^{-1}$ ;  $^1\text{H}$  NMR (300 MHz,  $\text{CDCl}_3$ )  $\delta$ : 8.12 (2H, d,  $J = 8.7$  Hz, arom), 8.02 (2H, d,  $J = 8.7$  Hz), 7.75-7.68 (4H, m, arom), 7.59-7.43 (3H, m, arom), 7.07-7.02 (2H, m, arom), 3.92-3.90 (3H, s,  $-\text{OCH}_3$ );  $^{13}\text{C}$  NMR (75 MHz,  $\text{CDCl}_3$ )  $\delta$ : 189.6, 160.1, 157.8, 154.6, 148.7, 148.3, 141.5, 136.9, 135.8, 134.7, 134.5, 134.4, 133.5, 130.9, 130.6, 128.9, 128.6, 128.3, 128.1, 126.3, 122.9, 121.5, 120.2, 120.0, 115.6, 113.9, 112.9, 54.8; Anal. Calcd for  $\text{C}_{25}\text{H}_{16}\text{ClNO}_2$ : C, 79.17; H, 5.96; N, 3.18. Found C, 79.40; H, 5.91; N, 3.31.

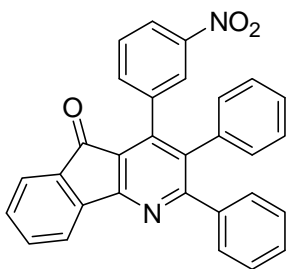

**4-(3-nitrophenyl)-2,3-diphenyl-5H-indeno[1,2-b]pyridin-5-one (14e):**

Dirty green solid, mp 228-230 °C; IR  $\nu_{\max}$  (KBr) 3421, 1715, 1569, 1518, and 1346  $\text{cm}^{-1}$ ;  $^1\text{H}$  NMR (300 MHz,  $\text{CDCl}_3$ )  $\delta$ : 8.15-8.09 (1H, m, arom), 8.02-8.00 (2H, m, arom), 7.67-7.60 (4H, m, arom), 7.47-7.37 (5H, m, arom), 7.28-7.19 (3H, m, arom), 7.06-7.05 (3H, m, arom), 6.84 (2H, br s, arom); Anal. Calcd for  $\text{C}_{30}\text{H}_{18}\text{N}_2\text{O}_3$ : C, 79.28; H, 3.99; N, 6.16. Found C, 79.40; H, 3.92; N, 6.31.

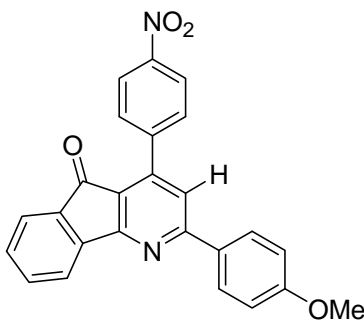

**2-(4-methoxyphenyl)-4-(4-nitrophenyl)-5H-indeno[1,2-b]pyridin-5-one (14f):**

Brown solid, mp 254-256 °C; IR  $\nu_{\max}$  (KBr) 3432, 1712, 1582 and 1502  $\text{cm}^{-1}$ ;  $^1\text{H}$  NMR (300 MHz,  $\text{CDCl}_3$ )  $\delta$ : 8.29-8.27 (4H, m, arom), 7.97-7.52 (7H, m, arom), 7.05 (2H, br s, arom), 3.82-3.80 (3H, s,  $-\text{OCH}_3$ ); Anal. Calcd for  $\text{C}_{25}\text{H}_{16}\text{N}_2\text{O}_4$ : C, 73.52; H, 3.95; N, 6.86. Found C, 73.29; H, 3.91; N, 6.98.

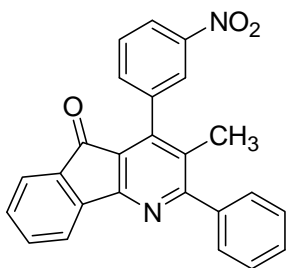

**3-methyl-4-(3-nitrophenyl)-2-phenyl-5H-indeno[1,2-b]pyridin-5-one (14g):**

Dirty green solid, mp 214-216 °C; IR  $\nu_{\max}$  (KBr) 3412, 1709, 1571, 1527, and 1365  $\text{cm}^{-1}$ ;  $^1\text{H}$  NMR (300 MHz,  $\text{CDCl}_3$ )  $\delta$ : 8.29 (1H, d,  $J = 6.3$  Hz, arom), 8.15 (1H, br s, arom), 7.86 (1H, d,  $J = 7.5$  Hz, arom), 7.67-7.31 (9H, m, arom), 7.20-7.19 (1H, m, arom), 2.03 (3H, s,  $-\text{CH}_3$ );  $^{13}\text{C}$  NMR (75 MHz,  $\text{CDCl}_3$ )  $\delta$ : 191.1,

164.1, 148.3, 142.9, 140.2, 136.6, 135.2, 135.1, 134.7, 130.9, 129.4, 129.1, 129.0, 128.9, 128.4, 123.9, 123.7, 123.4, 121.1, 17.6; Anal. Calcd for C<sub>25</sub>H<sub>16</sub>N<sub>2</sub>O<sub>3</sub>: C, 76.52; H, 4.11; N, 7.14. Found C, 76.55; H, 4.10; N, 7.19.

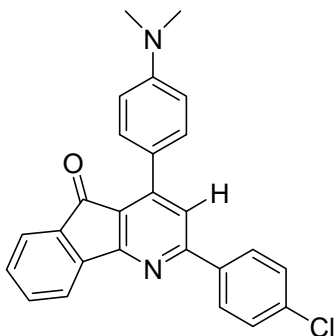

**2-(4-chlorophenyl)-4-(4-(dimethylamino)phenyl)-5H-indeno[1,2-b]pyridin-5-one (14h):**

Red solid, mp 264-266 °C; IR  $\nu_{\max}$  (KBr) 3408, 1704, 1571, 1527, and 1366 cm<sup>-1</sup>; <sup>1</sup>H NMR (300 MHz, CDCl<sub>3</sub>)  $\delta$ : 8.01 (2H, d, J = 8.7 Hz, arom), 7.86 (1H, d, J = 7.2 Hz, arom), 7.71 (1H, t, J = 6.6 Hz, arom), 7.63-7.50 (3H, m, arom), 7.43-7.34 (4H, m, arom), 6.71 (2H, d, J = 8.7 Hz, arom), 3.01-2.97 (6H, m, -2xNCH<sub>3</sub>); <sup>13</sup>C NMR (75 MHz, CDCl<sub>3</sub>)  $\delta$ : 191.2, 166.7, 159.0, 152.4, 152.2, 151.5, 150.0, 142.9, 137.1, 135.9, 135.6, 134.8, 134.5, 132.3, 132.2, 131.8, 130.8, 130.5, 128.9, 128.8, 128.6, 128.3, 127.7, 123.6, 123.4, 122.3, 122.1, 121.9, 120.7, 120.2, 111.4, 110.8, 40.2; Anal. Calcd for C<sub>26</sub>H<sub>19</sub>ClN<sub>2</sub>O: C, 76.00; H, 4.66; N, 6.82. Found C, 76.24; H, 4.68; N, 6.91.

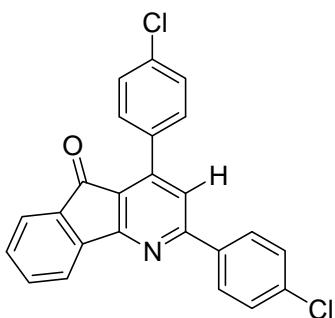

**2,4-bis(4-chlorophenyl)-5H-indeno[1,2-b]pyridin-5-one (14i):**

Yellowish green solid, mp 180-182 °C; IR  $\nu_{\max}$  (KBr) 3412, 1709, 1572, 1527, and 1365 cm<sup>-1</sup>; <sup>1</sup>H NMR (300 MHz, CDCl<sub>3</sub>)  $\delta$ : 8.11 (2H, d, J = 7.8 Hz, arom), 7.97 (1H, d, J = 7.5 Hz, arom), 7.70-7.55 (4H, m, arom), 7.50-7.43 (6H, m, arom); <sup>13</sup>C NMR (75 MHz, CDCl<sub>3</sub>)  $\delta$ : 190.8, 166.6, 159.9, 148.3, 142.8, 136.5, 135.9, 135.4, 135.0, 133.6, 131.2, 130.4, 129.4, 129.1, 128.9, 128.7, 128.5, 128.4, 128.3, 128.1, 123.8,

122.6, 121.0, 120.5, 116.7; Anal. Calcd for  $C_{24}H_{13}Cl_2NO$ : C, 71.66; H, 3.26; N, 3.48. Found C, 71.88; H, 3.31; N, 3.61.



### <sup>1</sup>H NMR and <sup>13</sup>C NMR spectra for 14a-14i

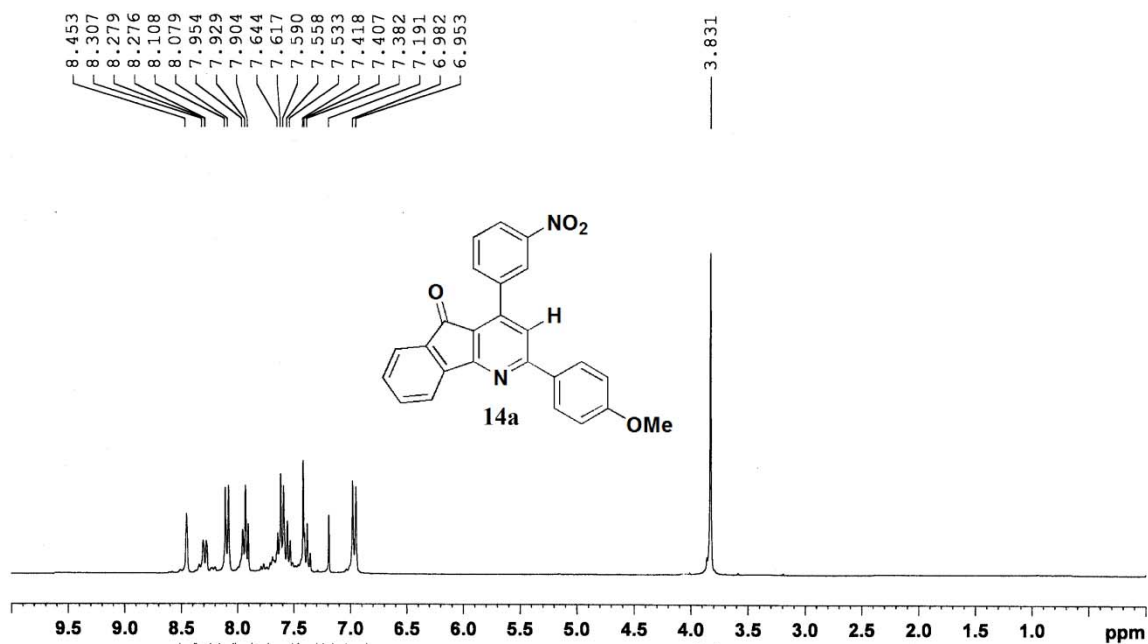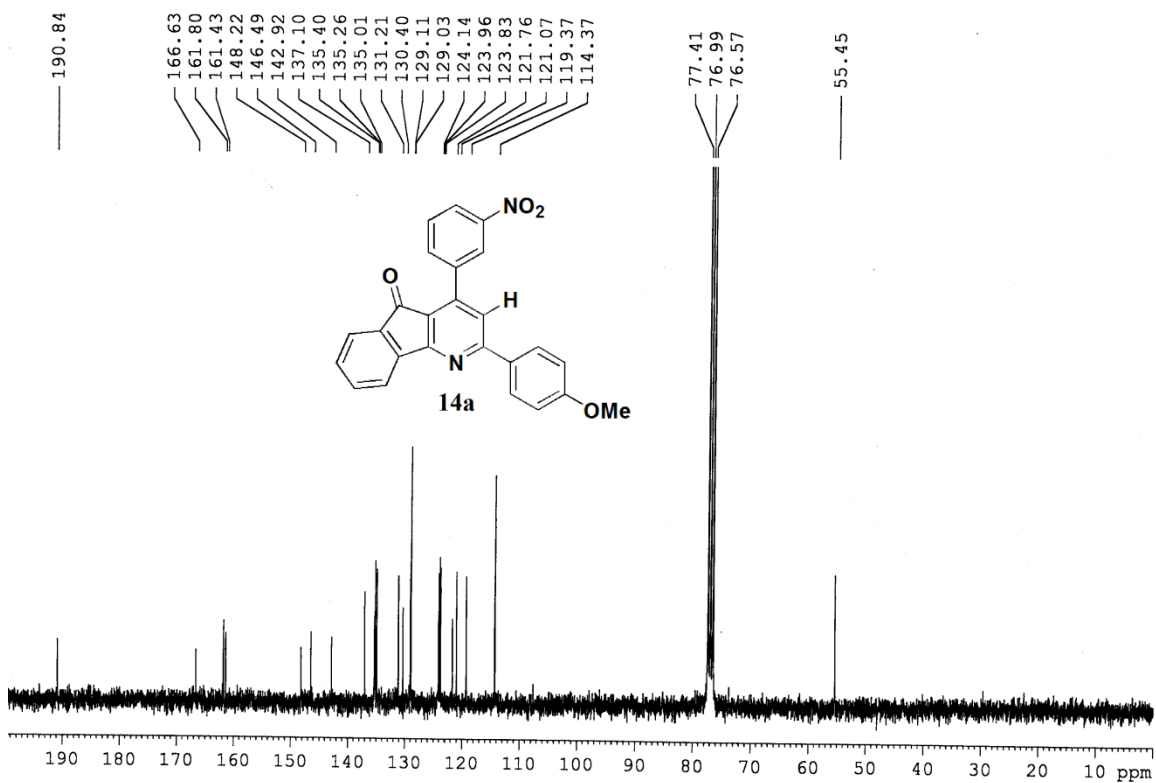

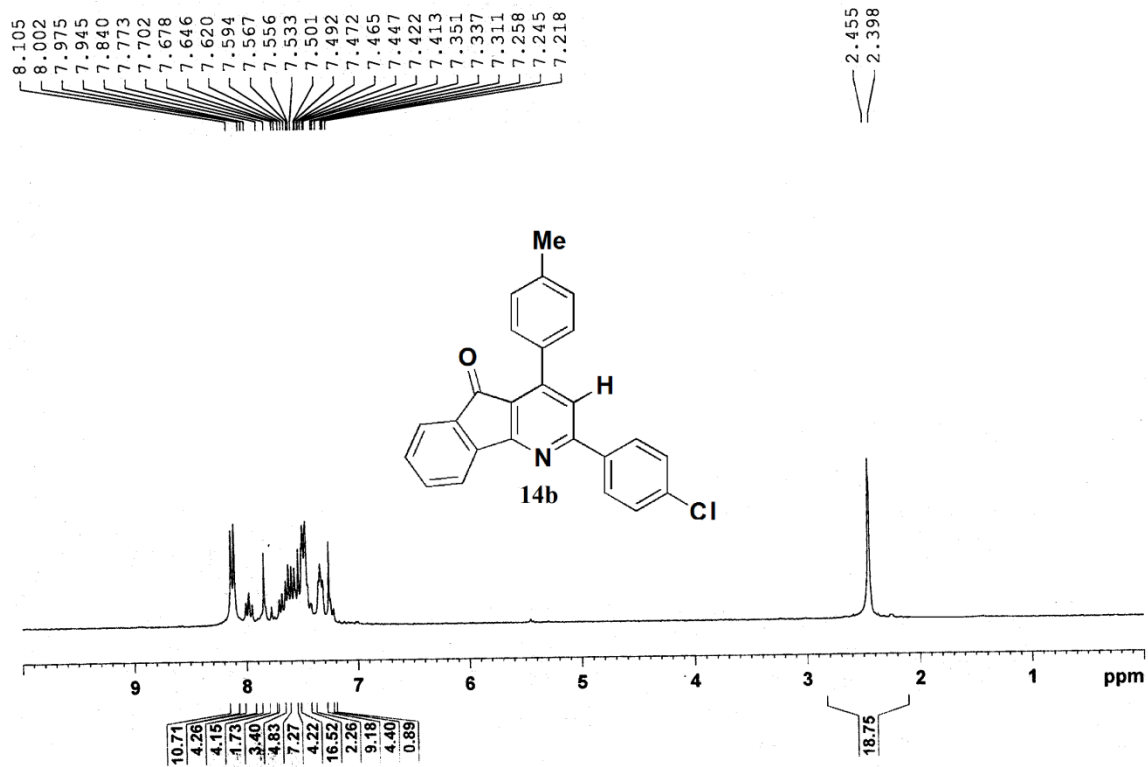

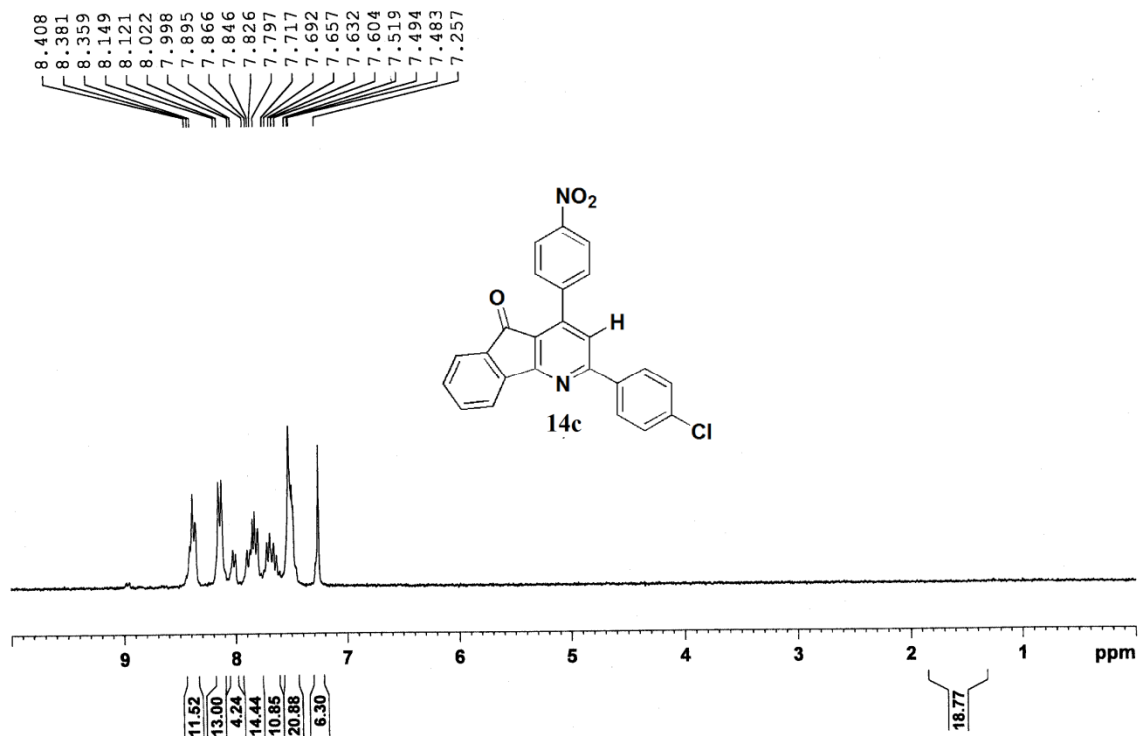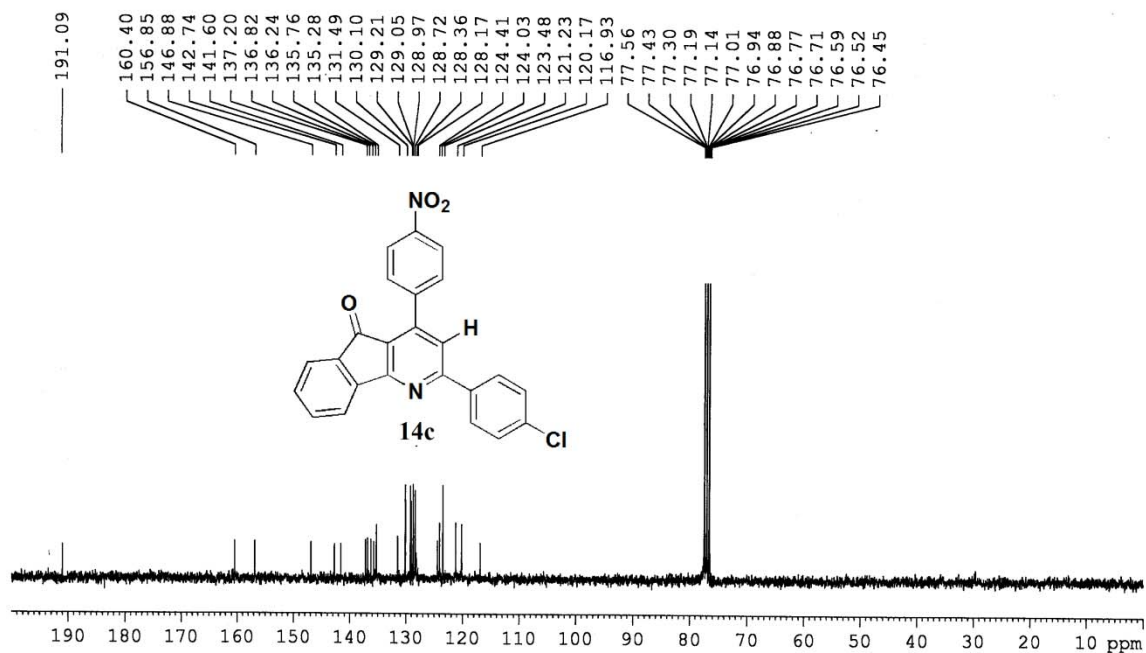

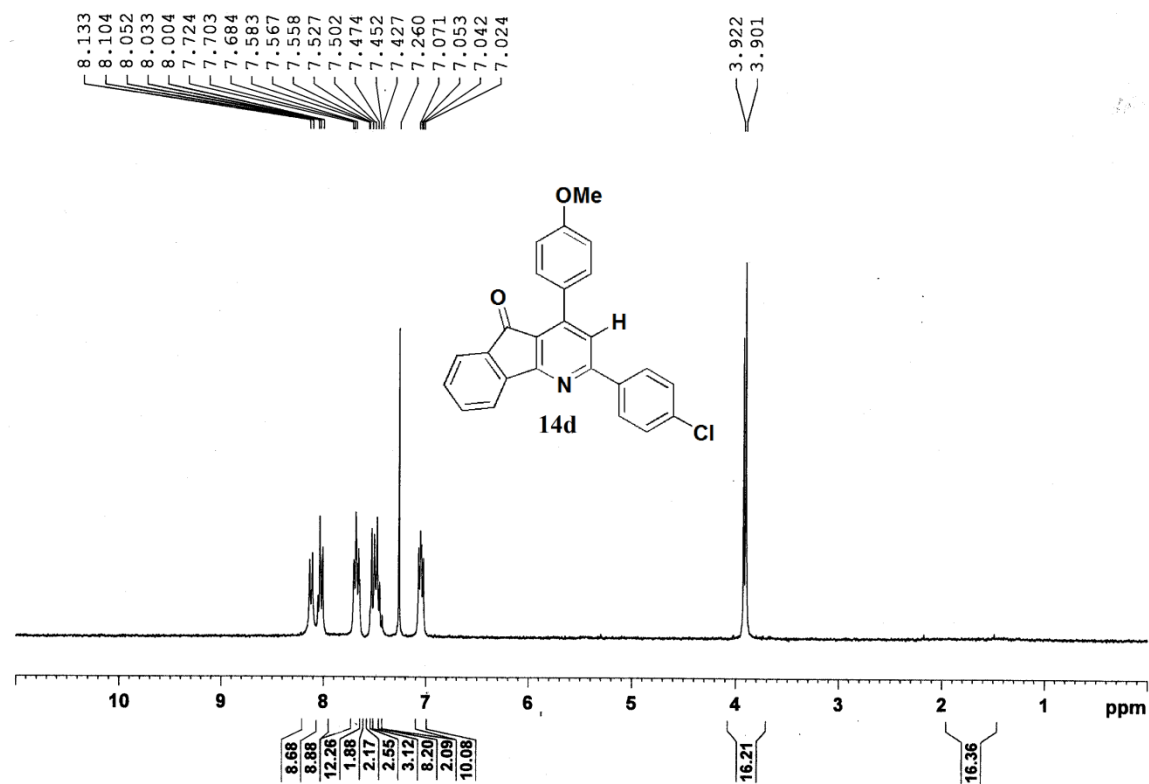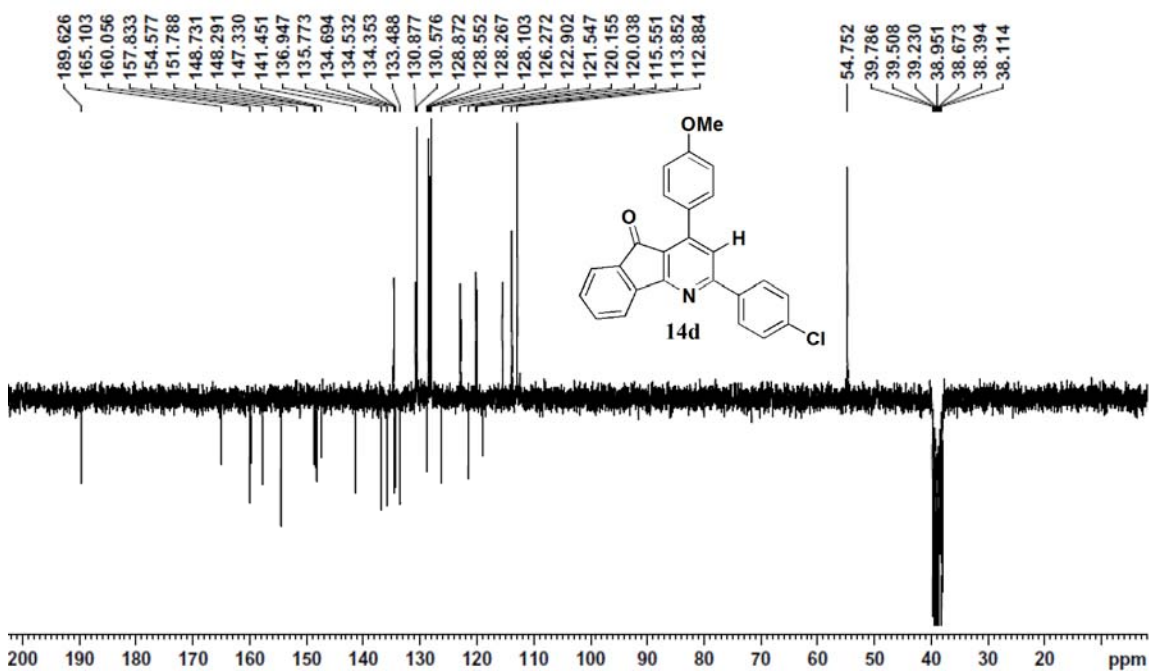

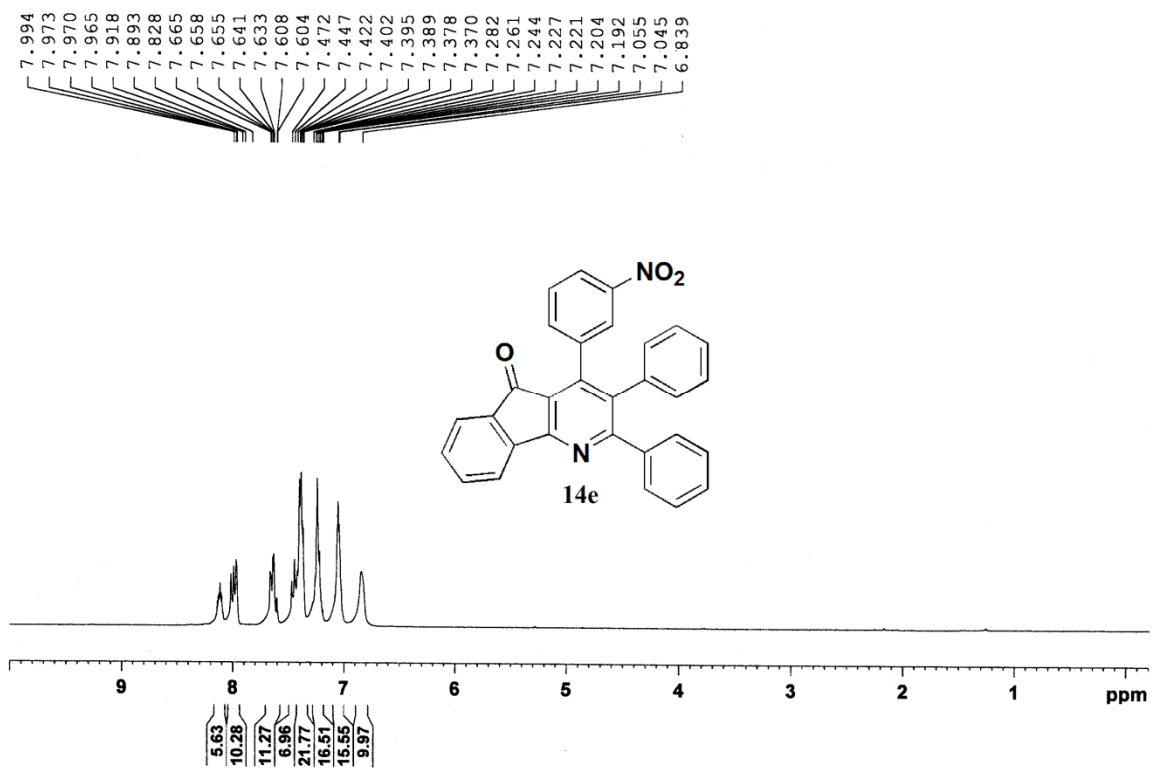

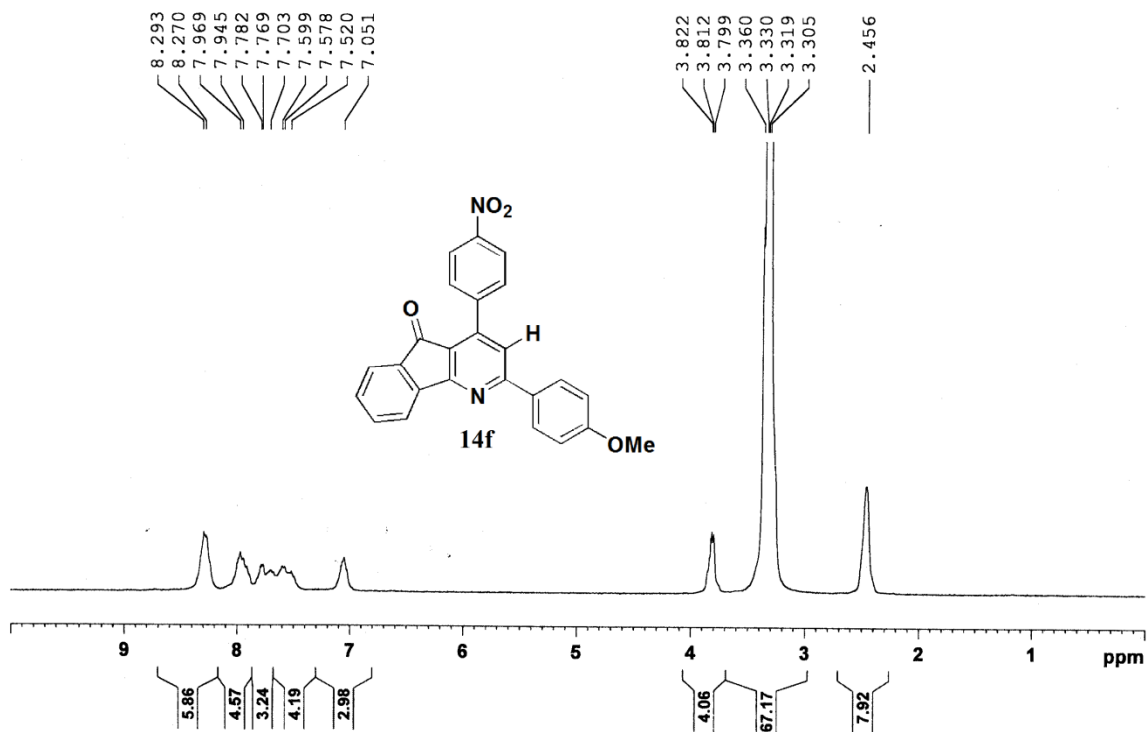

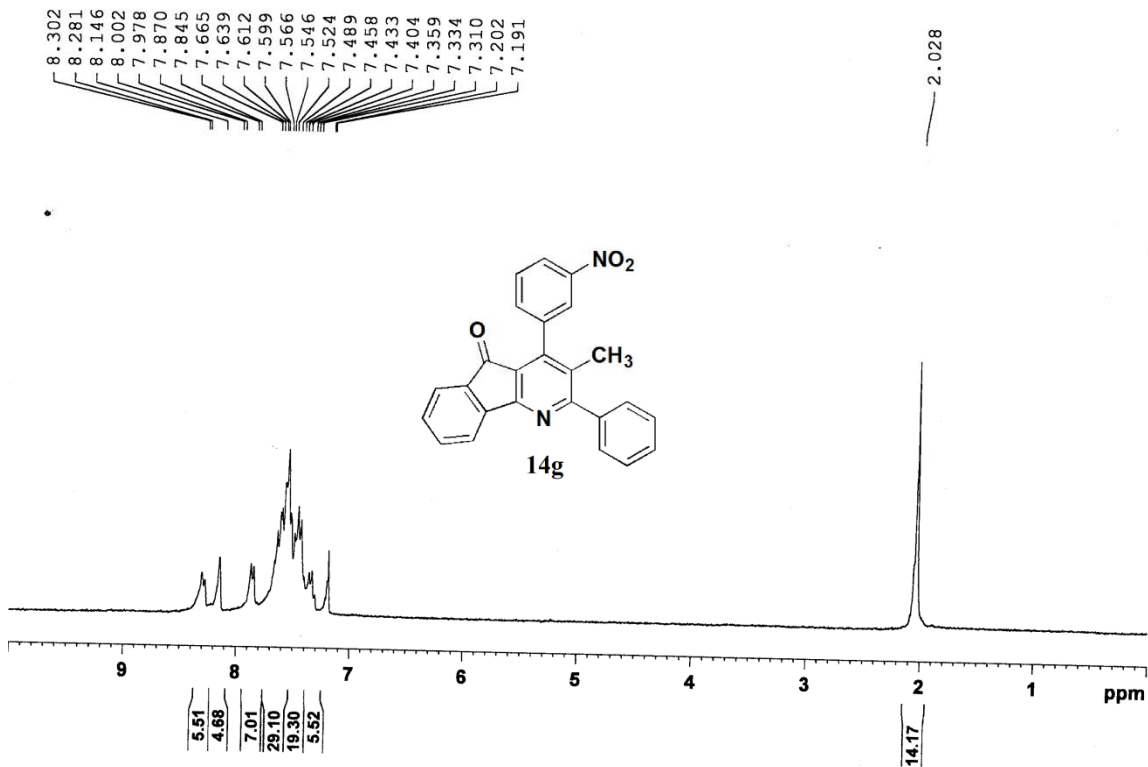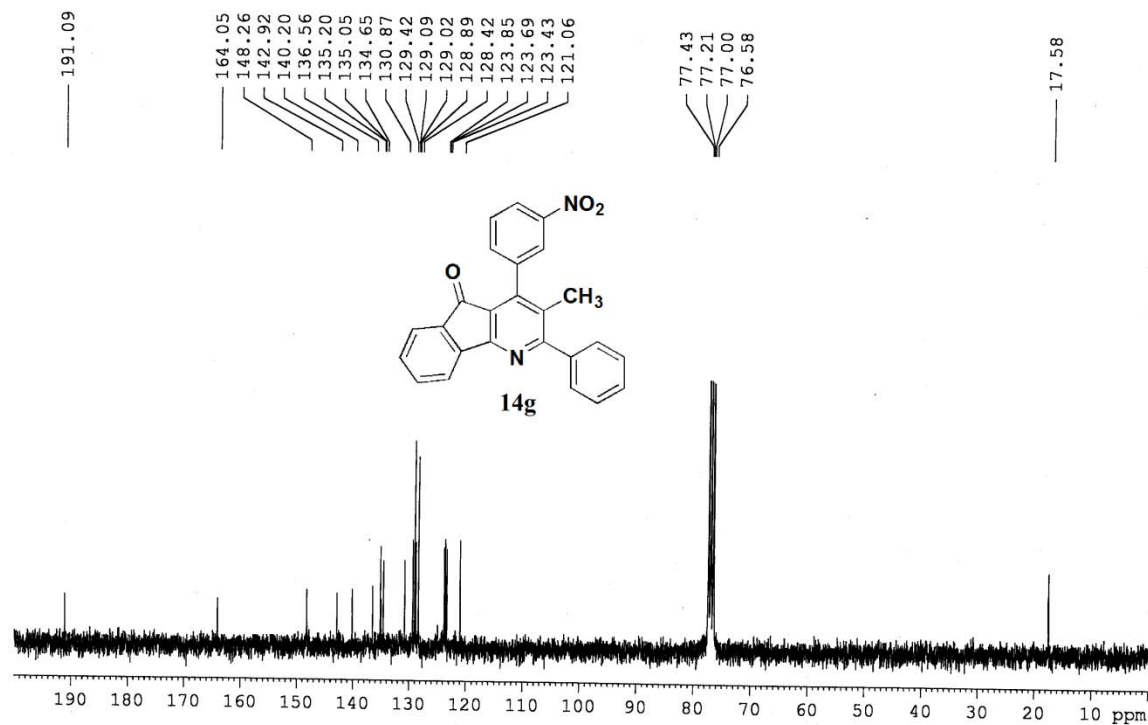

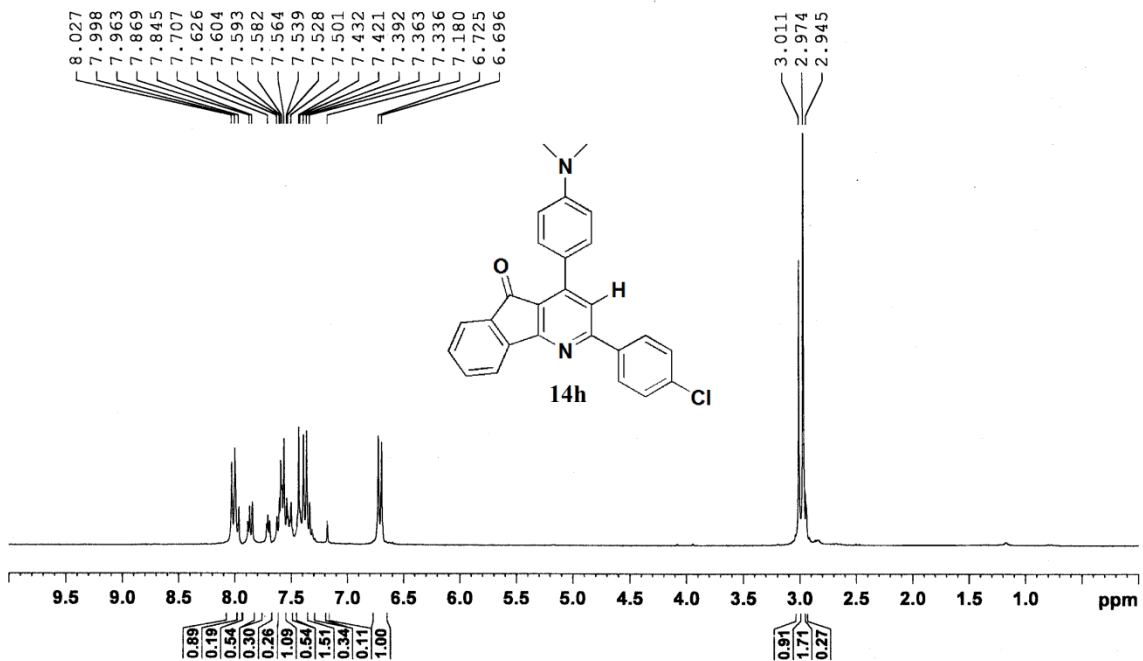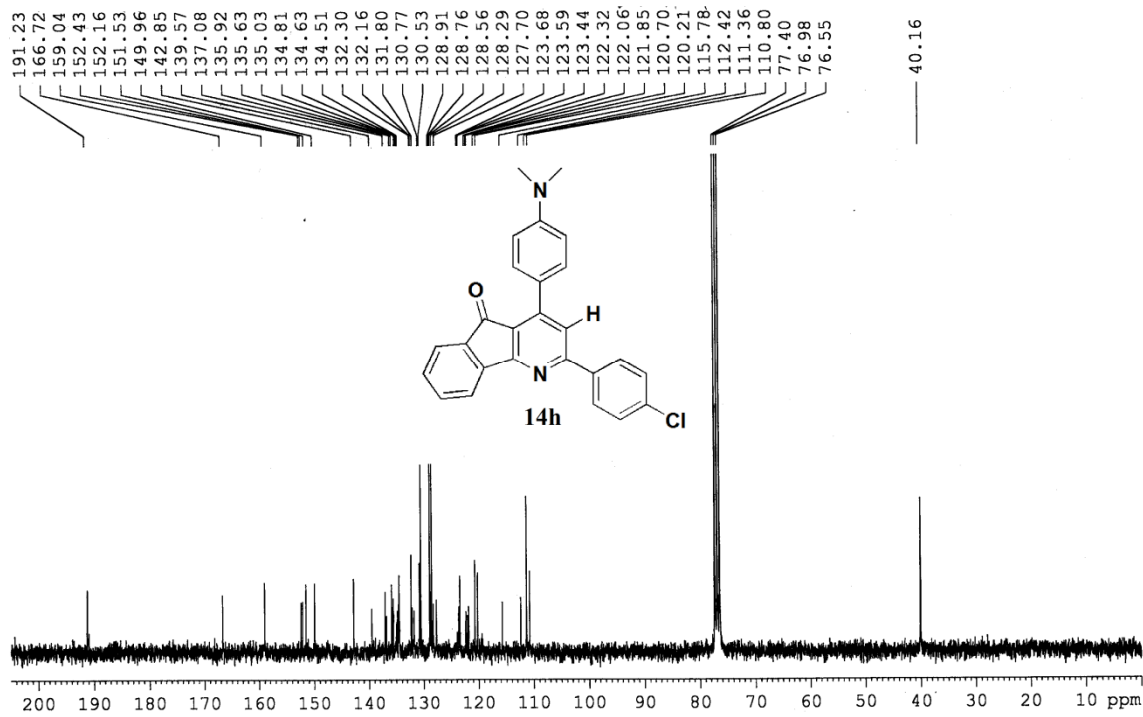



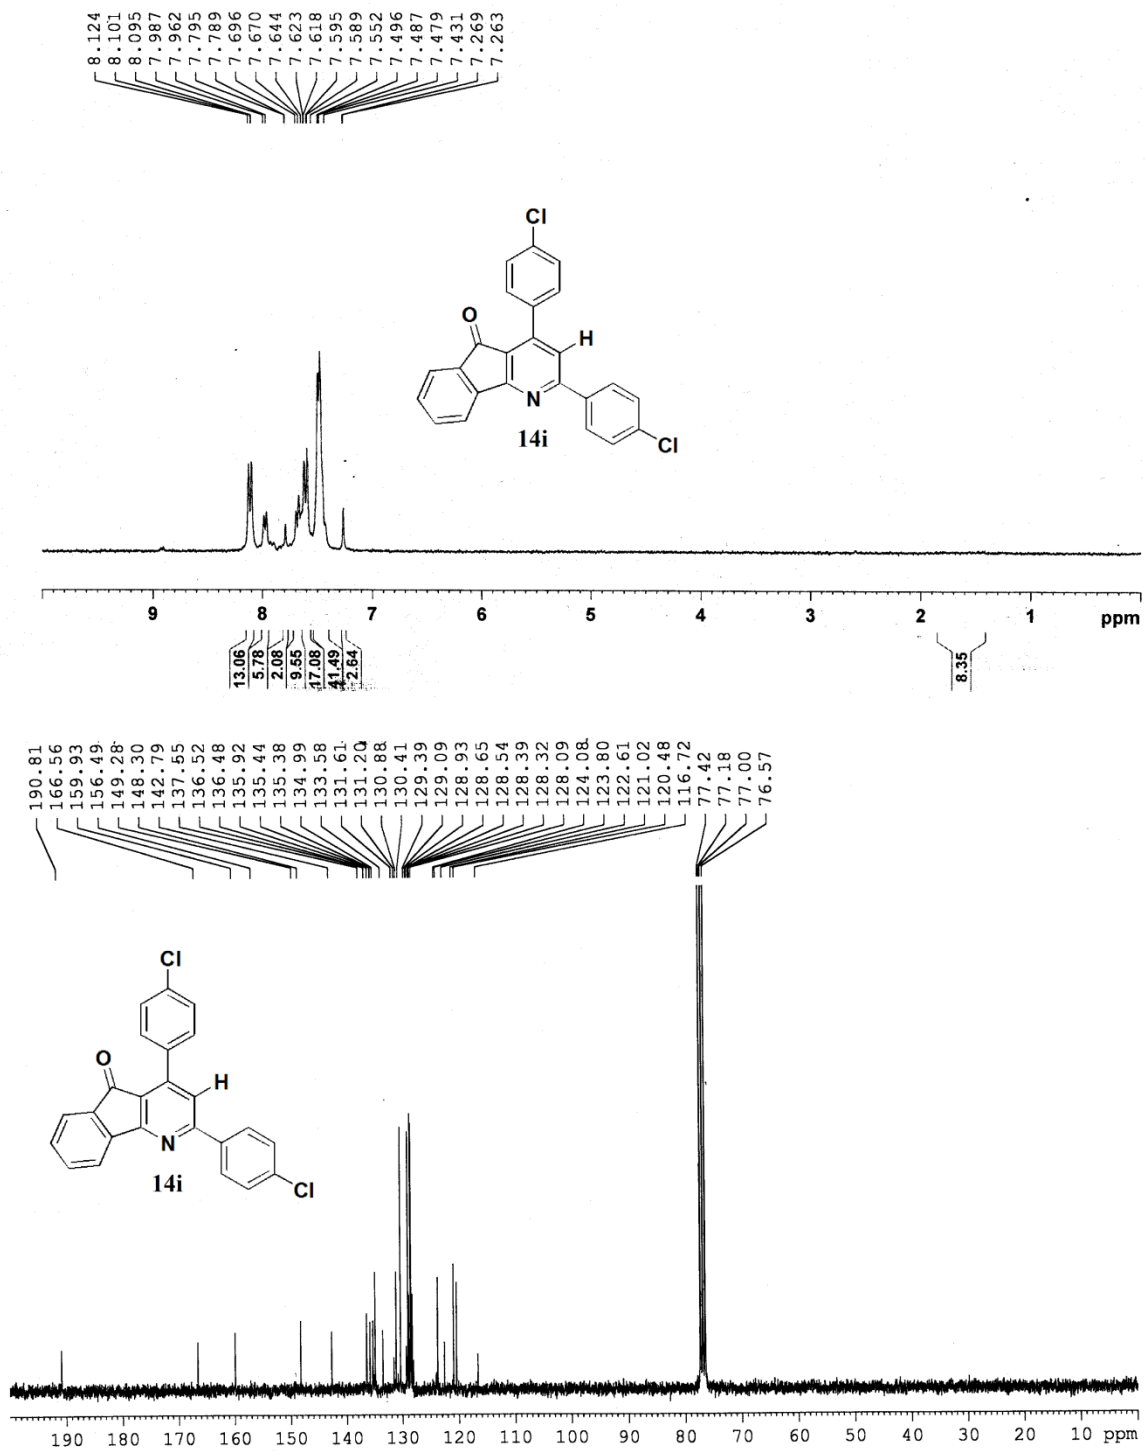

## Spectroscopic characterization for 8b, 9, 10

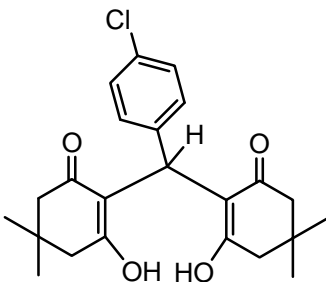

### 2-((4-chlorophenyl)(2-hydroxy-4,4-dimethyl-6-oxocyclohex-1-enyl)methyl)-3-hydroxy-5,5-dimethylcyclohex-2-enone (8b):

White solid, mp 140-142 °C; IR  $\nu_{\max}$  (KBr) 3061, 2950, 2875, 1600, 1490, 1370, 1300, and 1250  $\text{cm}^{-1}$ ;  $^1\text{H}$  NMR (300 MHz,  $\text{CDCl}_3$ )  $\delta$ : 11.88 (2H, s), 7.23 (2H, d,  $J = 8.7$  Hz), 7.01 (2H, d,  $J = 8.4$  Hz), 5.47 (1H, s), 2.49-2.28 (8H, m), 1.22 (6H, s), 0.99 (6H, s).  $^{13}\text{C}$  NMR (75 MHz,  $\text{CDCl}_3$ )  $\delta$ : 190.6, 189.4, 136.7, 131.6, 128.4, 128.2, 115.3, 47.1, 46.4, 32.4, 31.4, 29.6 and 27.4; Anal. Calcd for  $\text{C}_{23}\text{H}_{27}\text{ClO}_4$ : C, 68.56; H, 6.75. Found C, 68.70; H, 6.68.

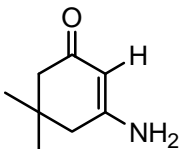

### 3-amino-5,5-dimethylcyclohex-2-enone (9):

White solid, mp 128-130 °C ( $\text{CH}_2\text{Cl}_2 + \text{EtOAc}$ , equal volumes);  $^1\text{H}$  NMR (300 MHz,  $\text{DMSO}-d_6$ )  $\delta$ : 6.61 (2H, br s), 4.81 (1H, s), 2.02 (2H, s), 1.81 (2H, s), 0.86 (6H, s);  $^{13}\text{C}$  NMR (75 MHz,  $\text{DMSO}-d_6$ )  $\delta$ : 194.0, 165.5, 96.0, 50.0, 41.7, 32.3, 28.2; Anal. Calcd for  $\text{C}_8\text{H}_{13}\text{NO}$ : C, 69.03; H, 9.41; N, 10.06. Found C, 69.31; H, 9.50; N, 10.21.

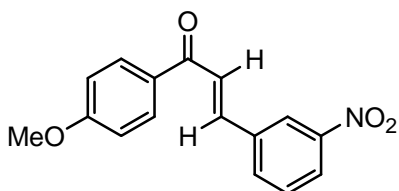

### 1-(4-methoxyphenyl)-3-(3-nitrophenyl)prop-2-en-1-one (10):

White solid, mp 128-130 °C ( $\text{CH}_2\text{Cl}_2 + \text{EtOAc}$ , equal volumes);  $^1\text{H}$  NMR (300 MHz,  $\text{DMSO}-d_6$ )  $\delta$ : 8.73 (1H, s), 8.30 (1H, d,  $J = 7.8$  Hz), 8.24-8.11 (4H, m), 7.81-7.69 (2H, m), 7.08 (2H, d,  $J = 8.7$  Hz), 3.86 (3H, s);  $^{13}\text{C}$  NMR (75 MHz,  $\text{DMSO}-d_6$ )  $\delta$ : 187.2, 163.5, 148.5, 141.7, 136.8, 134.1, 132.2, 131.4, 130.2, 129.3,

125.8, 124.3, 122.4, 121.7, 115.2, 113.1, 55.2; Anal. Calcd for  $C_{16}H_{13}NO_4$ : C, 67.84; H, 4.63; N, 4.94.

Found C, 68.01; H, 4.69; N, 4.78.

### <sup>1</sup>H NMR and <sup>13</sup>C NMR spectra for 8b, 9, 10

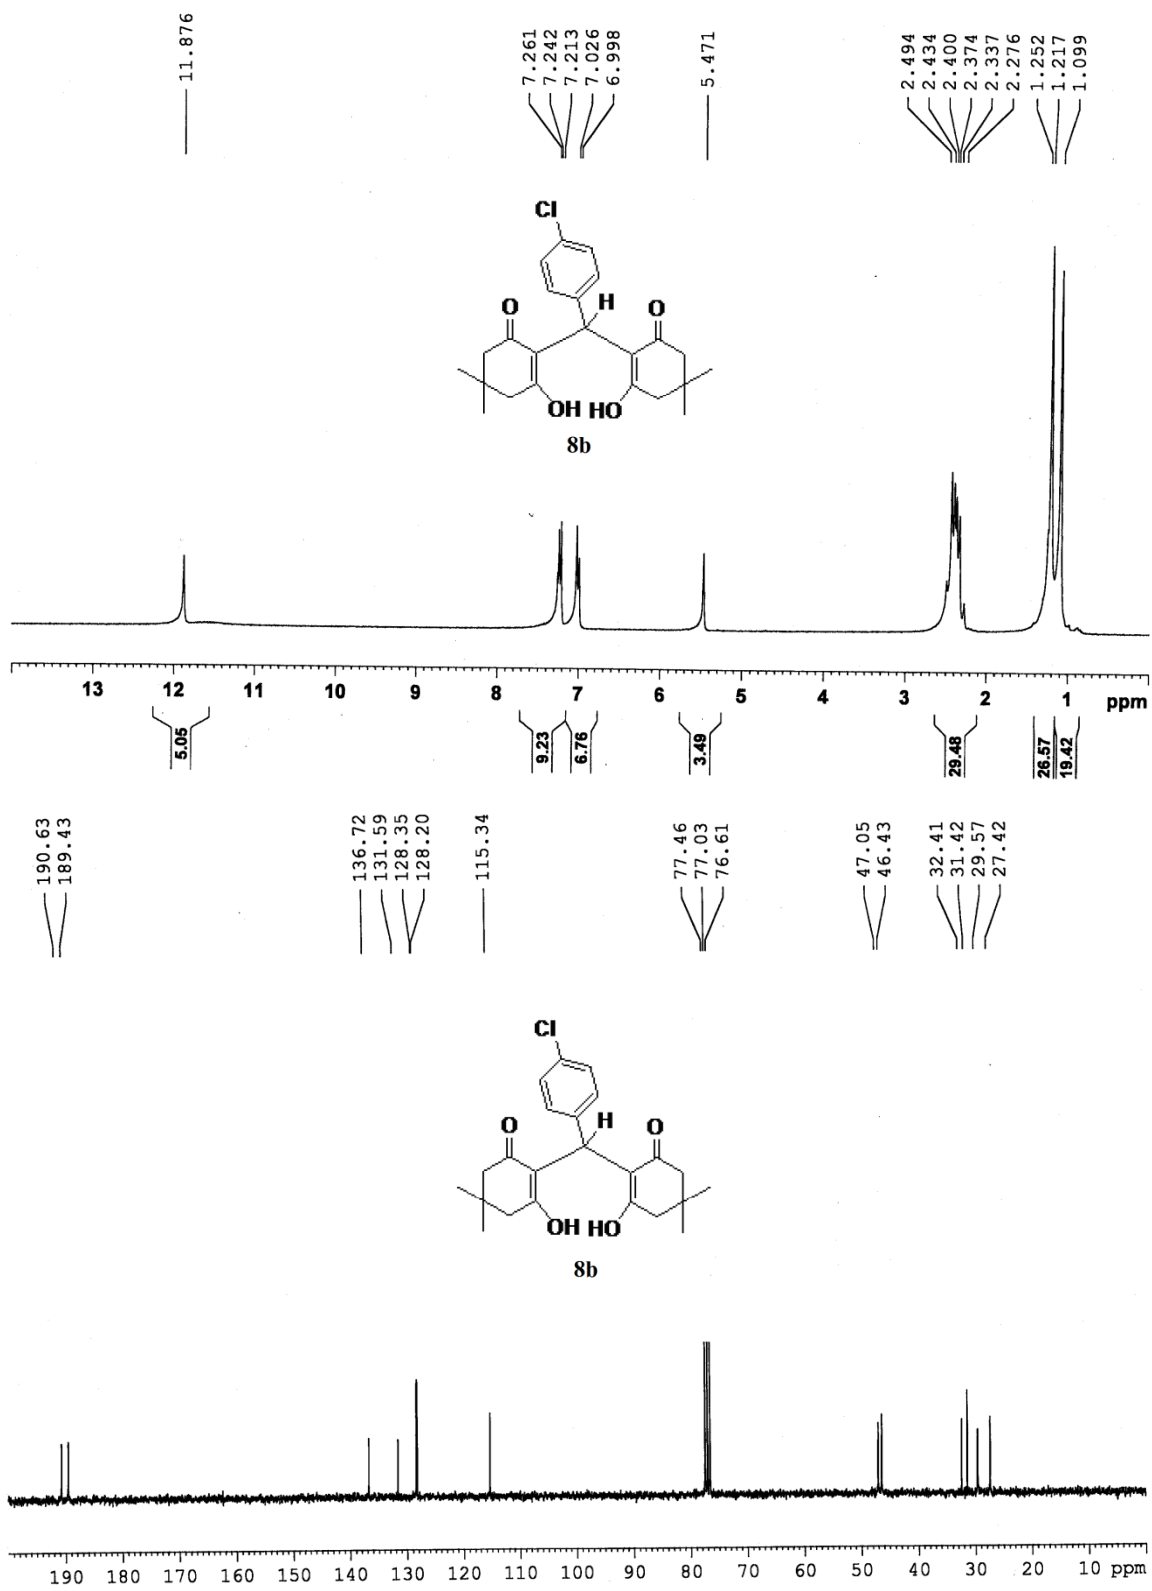

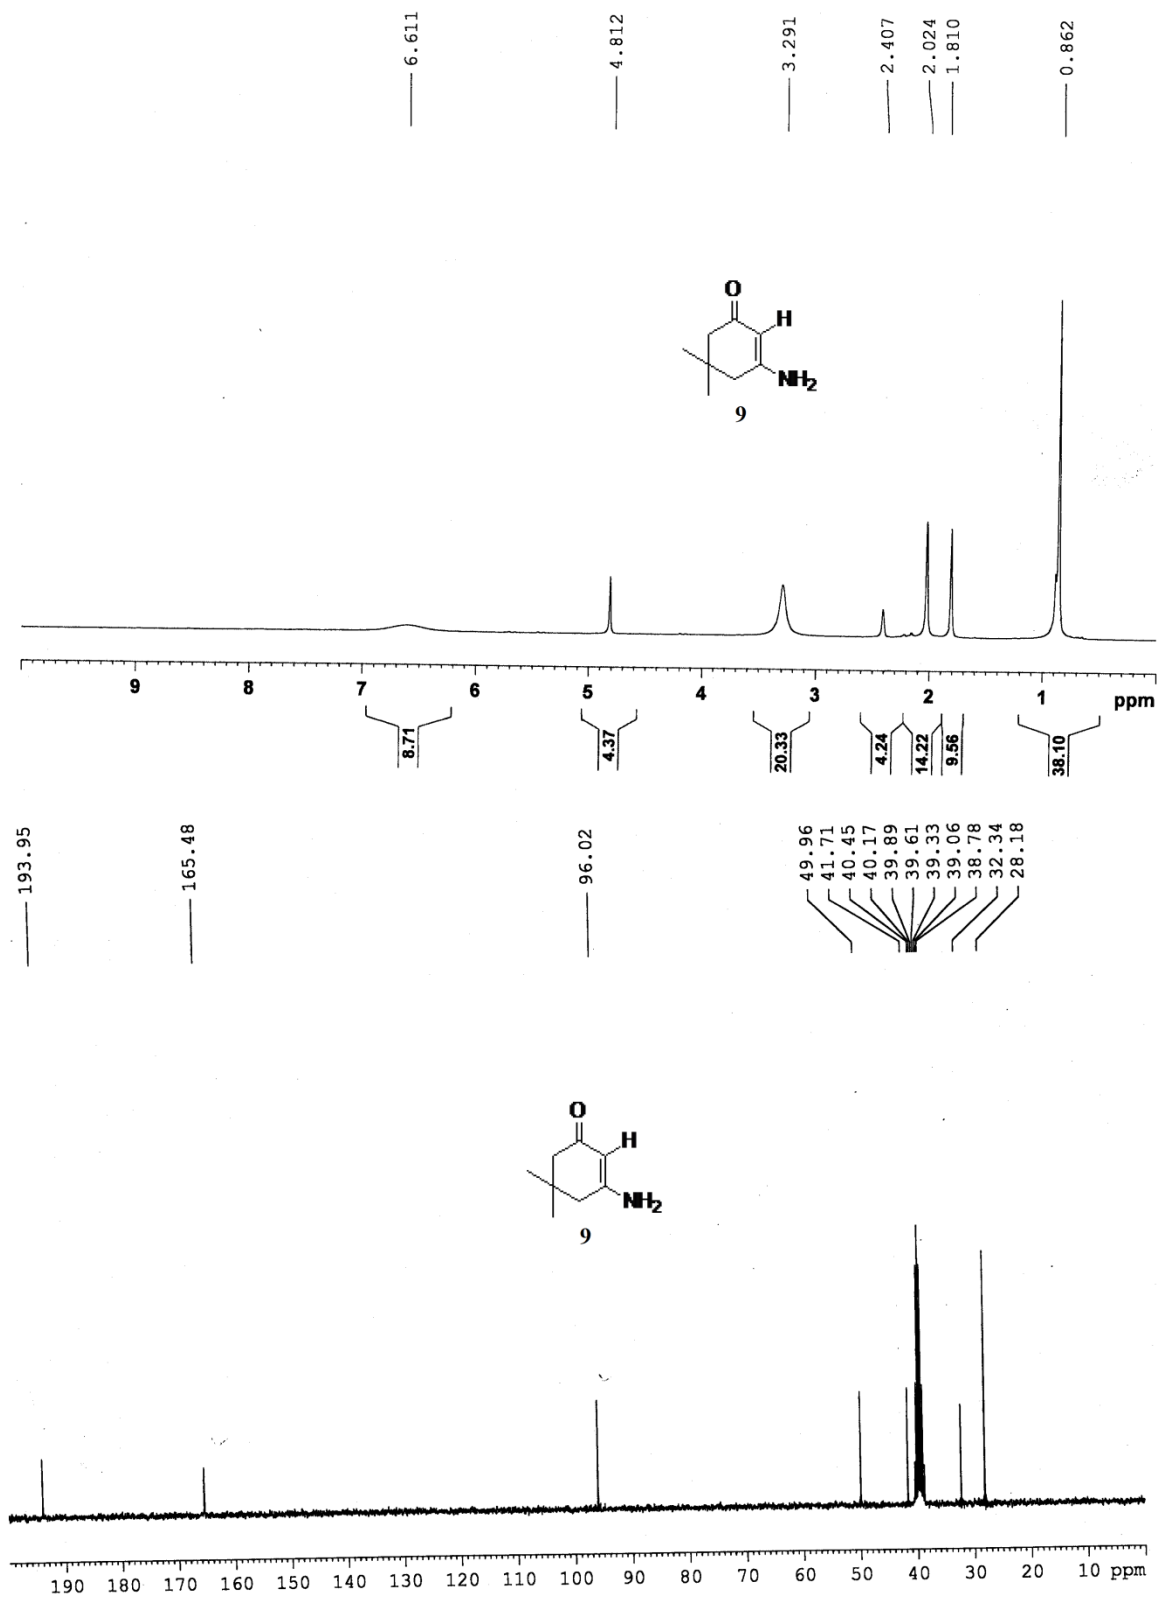

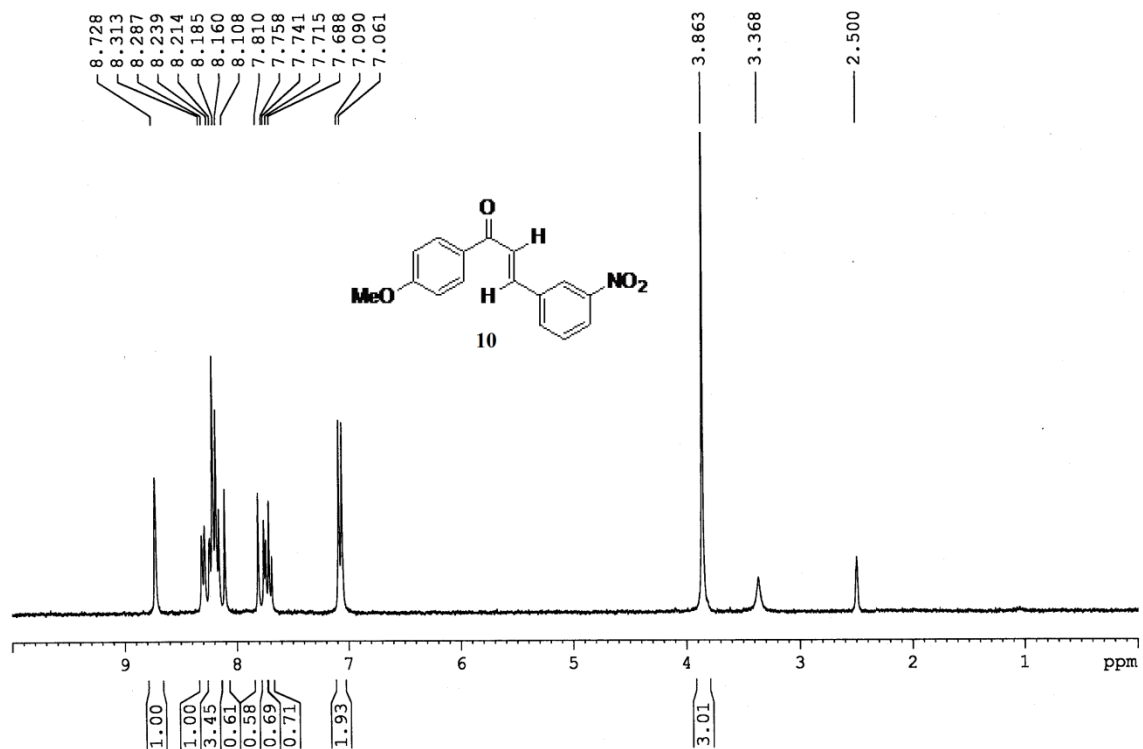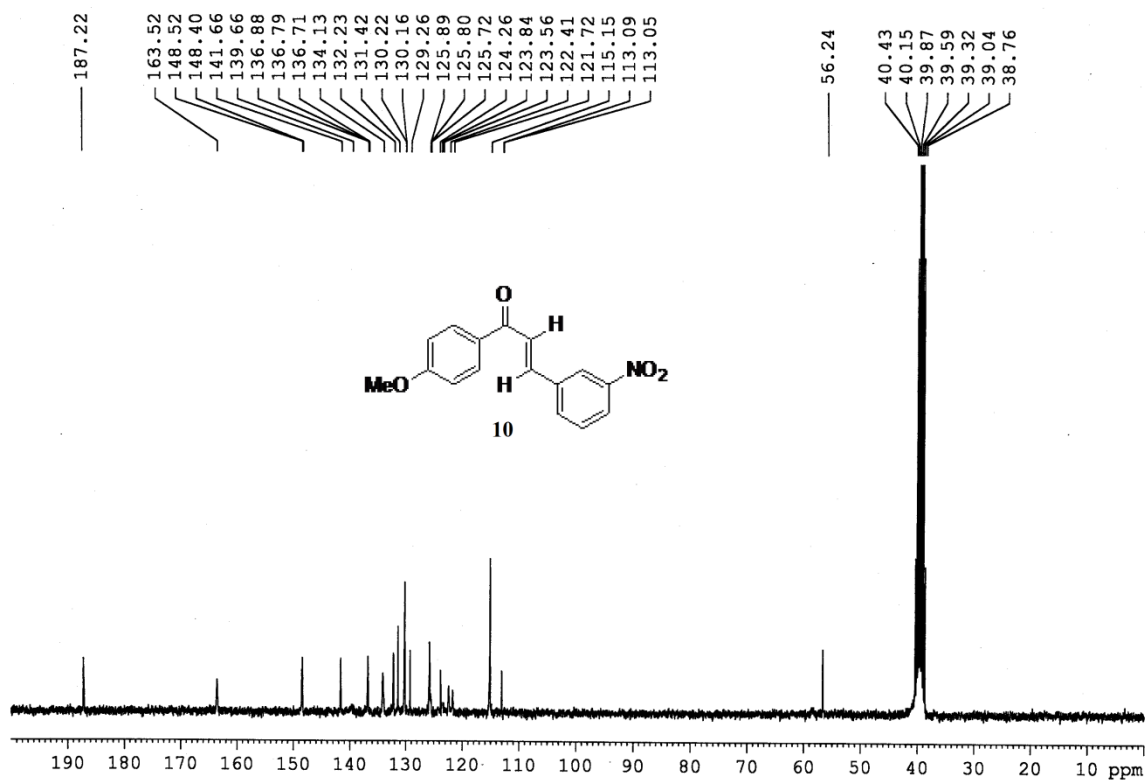

Supplement: c3gc40441b_3.pdf [file c3gc40441b_3.pdf]
