# Supplementary material for: A new MCM-41 supported HPF6 catalyst for the library synthesis of highly substituted 1,4-dihydropyridines and oxidation to pyridines: report of one-dimensional packing towards LMSOMs and studies on their photophysical properties
Source: Royal Society of Chemistry journal article supplement (doi:10.1039/c3gc40441b), 2013-01-01
Supplement: c3gc40441b.pdf [file c3gc40441b.pdf]

## Supporting Information 1

# A new MCM-41 supported HPF<sub>6</sub> catalyst for the library synthesis of highly substituted 1,4-dihydropyridines and oxidation to pyridines: report of one-dimensional packing towards LMSOMs and studies on their photophysical properties

Suman Ray<sup>a</sup>, Mike Brown<sup>b</sup>, Asim Bhaumik<sup>c</sup>, Arghya Dutta<sup>c</sup> and Chhanda Mukhopadhyay<sup>a\*</sup>

*a: Department of Chemistry, University of Calcutta, 92 APC Road, Kolkata-700009, India*

*b: Bruker Bio Spin, 2700 Technology Forest Drive, Woodlands, Texas 77381, USA*

*c: Department of Materials Science, Indian Association for the Cultivation of Science, Jadavpur, Kolkata 700 032, India.*

[cmukhop@yahoo.co.in](mailto:cmukhop@yahoo.co.in)\*

### Table of Contents

|                                                                           |       |
|---------------------------------------------------------------------------|-------|
| Materials and Methods .....                                               | 2     |
| ORTEP DIAGRAM for <b>5d</b> , <b>6i</b> , <b>6r</b> .....                 | 3     |
| General synthetic procedure for the preparation of <b>5a-5w</b> .....     | 4     |
| Spectroscopic characterization for <b>5a-5w</b> .....                     | 5-15  |
| <sup>1</sup> H NMR and <sup>13</sup> C NMR spectra for <b>5a-5w</b> ..... | 16-36 |
| Preparation MCM-41 supported HPF <sub>6</sub> catalyst .....              | 37    |

## Materials and Methods

All solvents were dried by standard methods. Chemicals were purchased from Aldrich, USA and Spectrochem, India and used without further purification. TLC was done on glass sheets pre-coated with silica gel (with binder, 300 mesh, Spectrochem). The  $^1\text{H}$ - and  $^{13}\text{C}$ -NMR analysis were carried out on Bruker-Advance Digital 300 MHz and 75.5 MHz instruments in  $\text{D}_6\text{-DMSO}$  and  $\text{CDCl}_3$  with TMS as an internal reference. The chemical shifts were reported as  $\delta$  values (ppm) relative to TMS. IR spectra were recorded in KBr pellets in reflection mode on a Perkin Elmer RX-1 FTIR spectrophotometer. CHN analysis was performed using a Perkin-Elmer 2400 Series II CHN analyzer. X-ray diffraction patterns of the powder sample were obtained with a Seifert P3000 diffractometer using  $\text{Cu K}\alpha$  ( $\lambda = 0.15406$  nm) radiation. Nitrogen adsorption/desorption isotherms were obtained using a Quantachrome Autosorb 1C at 77 K. Prior to gas adsorption, all the samples were degassed for 2 h at 403 K. Transmission electron microscopic images were recorded on a JEOL 2010 TEM operated at 200 kV in Indian Association for the Cultivation of Science, Jadavpur, Kolkata 700 032, India. The  $^{29}\text{Si}$  MAS NMR was referenced with respect to external TMS using 7mm zirconia rotor and 2.5–3.5 kHz speed for more than 5 h, scanning around 5000 scans in NMR Research Centre, IISc, Bangalore-560012.

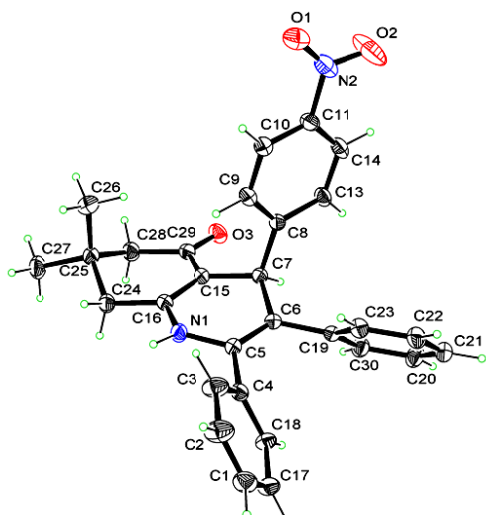

Figure 1. Ortep diagram of 5d showing the crystallographic numbering (CCDC 853740).

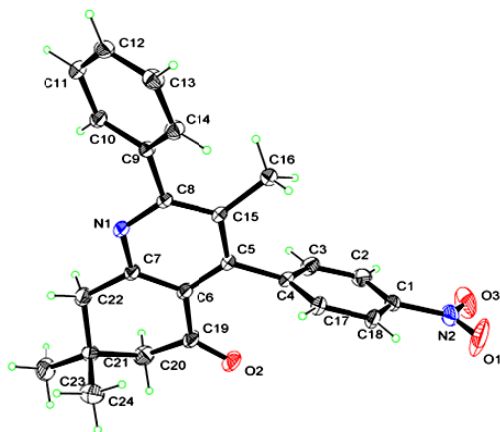

Figure 2. Ortep diagram of of (6i) showing the crystallographic numbering (CCDC 884043).

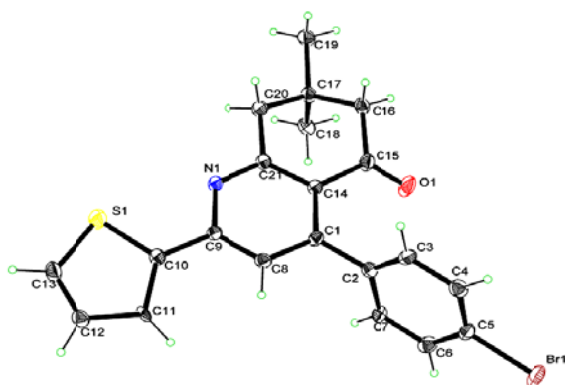

Figure 3. Ortep diagram of of (6r) showing the crystallographic numbering (CCDC 853739).

### **General synthetic procedure for the preparation of 5a-5w**

All the reactions were carried out in a round bottom flask equipped with a magnetic stirrer. In a typical reaction a solution of ketone (1 mmol), 1,3-diketoneone (1 mmol), aldehyde (1 mmol), and ammonium carbonate (1.2 mmol) in water (2 ml) were stirred at room temperature till completion using 40 mg of silica-HPF<sub>6</sub> catalyst. The completion of the reaction was indicated by the disappearance of the starting material in thin layer chromatography. After completion of the reaction the crude product was taken in dichloromethane and filtered to separate the products as filtrate from the catalyst (residue). The solvent was evaporated in rotary evaporator and the crude product was further purified by silica gel column chromatography (25% ethyl acetate/75% petroleum ether). The products were characterized by IR, <sup>1</sup>H NMR, <sup>13</sup>C NMR, CHN and X-ray single crystal analysis. The spectral and analytical data of all the novel 1,4-dihydropyridine compounds are given below.

### Spectroscopic characterization for 5a-5w:

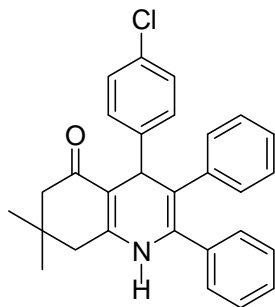

#### 4-(4-chlorophenyl)-7,8-dihydro-7,7-dimethyl-2,3-diphenylquinolin-5(1H,4H,6H)-one (5a):

Yellow solid, mp 240-242 °C; IR  $\nu_{\max}$  (KBr) 3435, 3012, 2962, 1685, 1573, 1518, 1457, and 1238  $\text{cm}^{-1}$ ;  $^1\text{H}$  NMR (300 MHz,  $\text{CDCl}_3$ )  $\delta$ : 7.27 (2H, d,  $J = 8.1$  Hz), 7.17-7.11 (7H, m), 6.93 (3H, brs), 6.78 (2H, d,  $J = 3.6$  Hz), 5.99 (1H, s), 4.90 (1H, s), 2.42-2.06 (4H, m), 1.03 (3H, s), 0.83 (3H, s);  $^{13}\text{C}$  NMR (75 MHz,  $\text{CDCl}_3$ )  $\delta$ : 195.1, 149.4, 144.8, 139.4, 136.4, 132.7, 131.6, 129.8, 129.6, 129.2, 129.0, 128.7, 128.5, 127.7, 127.6, 126.2, 118.2, 116.4, 50.7, 41.7, 41.5, 32.6, 29.8, 26.7; Anal. Calcd for  $\text{C}_{29}\text{H}_{26}\text{ClNO}$ : C, 79.17; H, 5.96; N, 3.18. Found C, 79.34; H, 6.00; N, 3.26.

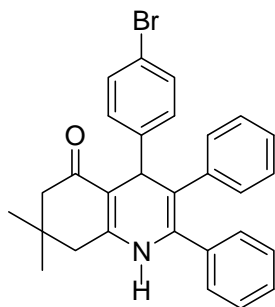

#### 4-(4-bromophenyl)-7,8-dihydro-7,7-dimethyl-2,3-diphenylquinolin-5(1H,4H,6H)-one (5b):

Yellow solid, mp 280-282 °C; IR  $\nu_{\max}$  (KBr) 3434, 3011, 2968, 1681, 1573, 1510, 1458, and 1238  $\text{cm}^{-1}$ ;  $^1\text{H}$  NMR (300 MHz,  $\text{CDCl}_3$ )  $\delta$ : 7.30-7.15 (9H, m), 6.94-6.01 (3H, m), 6.80-6.74 (2H, m), 4.89 (1H, s), 2.53-2.11 (4H, m), 1.04 (3H, s), 0.84 (3H, s);  $^{13}\text{C}$  NMR (75 MHz,  $\text{CDCl}_3$ )  $\delta$ : 193.0, 150.1, 145.6, 139.4, 135.2, 133.6, 130.4, 130.0, 129.8, 129.2, 129.0, 128.6, 127.6, 127.0, 126.8, 125.2, 118.2, 113.1, 106.0, 49.8, 40.9, 31.3, 29.0, 25.4; Anal. Calcd for  $\text{C}_{29}\text{H}_{26}\text{BrNO}$ : C, 71.90; H, 5.41; N, 2.89. Found C, 71.61; H, 5.43; N, 2.60.

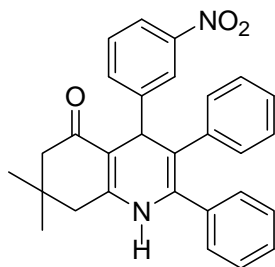

**7,8-dihydro-7,7-dimethyl-4-(3-nitrophenyl)-2,3-diphenylquinolin-5(1H,4H,6H)-one (5c):**

Yellow solid, mp 206-208 °C; IR  $\nu_{\max}$  (KBr) 3434, 3050, 2970, 1685, 1573, 1518, 1457, and 1244  $\text{cm}^{-1}$ ;  $^1\text{H}$  NMR (300 MHz,  $\text{CDCl}_3$ )  $\delta$ : 8.28 (1H, d,  $J = 1.8$  Hz), 7.99 (1H, dd,  $J = 7.2$  Hz and  $J = 1.2$  Hz), 7.34 (1H, t,  $J = 7.8$  Hz), 7.27 (5H, brs), 7.02-7.00 (3H, m), 6.86-6.83 (2H, m, aromatic-H), 5.99 (1H, s), 5.17 (1H, s), 2.51-2.16 (4H, m), 1.12 (3H, s), 0.92 (3H, s);  $^{13}\text{C}$  NMR (75 MHz,  $\text{CDCl}_3$ )  $\delta$ : 194.5, 153.7, 150.1, 146.3, 139.0, 136.1, 134.6, 129.5, 129.0, 128.7, 128.6, 127.9, 126.5, 122.5, 121.3, 115.9, 108.1, 50.6, 42.8, 41.5, 32.6, 29.7, 26.7; Anal. Calcd for  $\text{C}_{29}\text{H}_{26}\text{N}_2\text{O}_3$ : C, 77.31; H, 5.82; N, 6.22. Found C, 77.31; H, 5.90; N, 6.41.

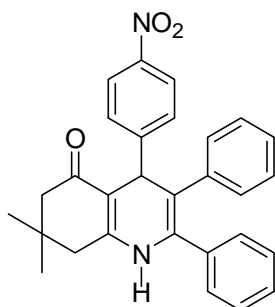

**7,8-dihydro-7,7-dimethyl-4-(4-nitrophenyl)-2,3-diphenylquinolin-5(1H,4H,6H)-one (5d)** (Table 1, entry 1): yellow solid, mp 254-256 °C; IR  $\nu_{\max}$  (KBr) 3434, 3012, 2949, 1685, 1573, 1518, 1457, and 1244  $\text{cm}^{-1}$ ;  $^1\text{H}$  NMR (300 MHz,  $\text{CDCl}_3$ )  $\delta$ : 8.10 (2H, d,  $J = 8.4$  Hz), 7.56 (2H, d,  $J = 8.4$  Hz), 7.26 (5H, d,  $J = 2.4$  Hz), 7.02-7.00 (3H, m), 6.84-6.81 (2H, m), 6.16 (1H, brs), 5.14 (1H, s), 2.53-2.04 (4H, m), 1.12 (3H, s), 0.91 (3H, s);  $^{13}\text{C}$  NMR (75 MHz,  $\text{CDCl}_3$ )  $\delta$ : 194.9, 153.5, 150.1, 146.3, 139.0, 136.0, 133.3, 129.4, 128.9, 128.7, 127.8, 126.5, 123.6, 122.7, 115.9, 108.1, 50.6, 42.8, 41.5, 32.6, 29.7, 26.7; Anal. Calcd for  $\text{C}_{29}\text{H}_{26}\text{N}_2\text{O}_3$ : C, 77.31; H, 5.82; N, 6.22. Found C, 77.60; H, 5.92; N, 6.02.

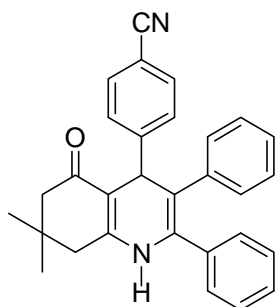

**4-(7,7-Dimethyl-5-oxo-2,3-diphenyl-1,4,5,6,7,8-hexahydro-quinolin-4-yl)-benzonitrile (5e):**

Yellow solid, mp 288-290 °C; IR  $\nu_{\max}$  (KBr) 3432, 3018, 2960, 1685, 1561, 1518, 1451, and 1245  $\text{cm}^{-1}$ ;  $^1\text{H}$  NMR (300 MHz,  $\text{DMSO-}d_6$ )  $\delta$ : 9.04 (1H, s), 7.68 (2H, d,  $J = 7.8$  Hz), 7.42 (2H, d,  $J = 8.4$  Hz), 7.24 (5H, br s), 6.95-6.94 (3H, m), 6.73-6.70 (2H, m), 4.86 (1H, s), 2.51-1.91 (4H, m), 0.98 (3H, s), 0.73 (3H, s);  $^{13}\text{C}$  NMR (75 MHz,  $\text{DMSO-}d_6$ )  $\delta$ : 193.6, 152.2, 151.3, 139.8, 135.7, 134.6, 132.3, 129.7, 129.2, 128.5, 128.3, 127.8, 126.0, 119.1, 113.4, 108.7, 106.1, 50.4, 42.6, 32.0, 29.6, 26.1; Anal. Calcd for  $\text{C}_{30}\text{H}_{26}\text{N}_2\text{O}$ : C, 83.69; H, 6.09; N, 6.51. Found C, 83.95; H, 6.17; N, 6.56.

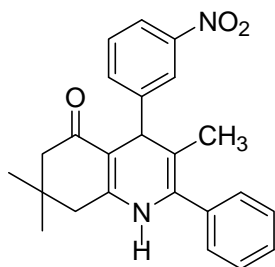

**3,7,7-Trimethyl-4-(3-nitro-phenyl)-2-phenyl-4,6,7,8-tetrahydro-1H-quinolin-5-one (5f):**

Wellowish white solid, mp 250-252 °C ( $\text{CH}_2\text{Cl}_2 + \text{EtOAc}$ , equal volumes); IR  $\nu_{\max}$  (KBr) 3432, 3061, 2972, 1684, 1572, 1518, 1458, and 1241  $\text{cm}^{-1}$ ;  $^1\text{H}$  NMR (300 MHz,  $\text{CDCl}_3$ )  $\delta$ : 8.23 (1H, s), 8.02 (2H, dd,  $J = 8.1$  Hz and  $J = 1.2$  Hz), 7.77 (2H, d,  $J = 7.5$  Hz), 7.45-7.33 (6H, m), 6.22 (1H, br s), 4.64 (1H, s), 2.43-1.99 (4H, m), 1.52 (3H, s), 1.08 (3H, s), 0.93 (3H, s);  $^{13}\text{C}$  NMR (75 MHz,  $\text{DMSO-}d_6$ )  $\delta$ : 192.8, 151.0, 148.7, 147.2, 134.9, 133.7, 130.8, 128.9, 128.6, 127.8, 127.7, 127.5, 121.3, 120.4, 109.4, 104.249.6, 42.3, 31.3, 28.8, 27.3, 25.7, 16.7; Anal. Calcd for  $\text{C}_{24}\text{H}_{24}\text{N}_2\text{O}_3$ : C, 74.21; H, 6.23; N, 7.40. Found C, 74.51; H, 6.30; N, 7.40.

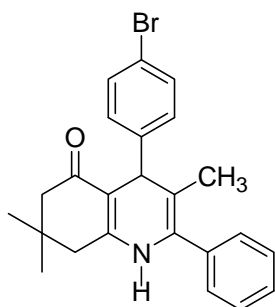

**4-(4-Bromo-phenyl)-3,7,7-trimethyl-2-phenyl-4,6,7,8-tetrahydro-1H-quinolin-5-one (5g):**

Yellowish white solid, mp 140-142 °C (CH<sub>2</sub>Cl<sub>2</sub> + EtOAc, equal volumes); IR  $\nu_{\max}$  (KBr) 3438, 3010, 2961, 1688, 1574, 1512, 1458, and 1231 cm<sup>-1</sup>; <sup>1</sup>H NMR (300 MHz, CDCl<sub>3</sub>)  $\delta$ : 7.37-7.20 (9H, m), 6.03 (1H, br s), 4.40 (1H, s), 2.34-1.91 (4H, m), 1.46 (3H, s), 1.01 (3H, s), 0.93 (3H, s); <sup>13</sup>C NMR (75 MHz, CDCl<sub>3</sub>)  $\delta$ : 196.8, 160.8, 158.8, 148.8, 139.2, 138.2, 131.9, 130.5, 130.2, 129.8, 129.1, 128.8, 128.6, 128.5, 127.9, 127.7, 127.5, 127.4, 122.9, 119.6, 52.5, 45.8, 31.7, 27.2, 16.7; Anal. Calcd for C<sub>24</sub>H<sub>24</sub>BrNO: C, 68.25; H, 5.73; N, 3.32. Found C, 68.20; H, 5.77; Br, N, 3.32.

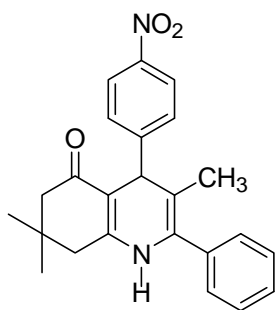

**7,8-dihydro-3,7,7-trimethyl-4-(4-nitrophenyl)-2-phenylquinolin-5-one (5h):**

Yellow solid, mp 244-246 °C (CH<sub>2</sub>Cl<sub>2</sub> + EtOAc, equal volumes); IR  $\nu_{\max}$  (KBr) 3430, 3068, 2951, 2869, 1681, 1576, 1530, and 1347 cm<sup>-1</sup>; <sup>1</sup>H NMR (300 MHz, DMSO-D<sub>6</sub>)  $\delta$ : 8.74 (1H, s), 8.16 (2H, dd, J = 6.9 Hz and J = 1.8 Hz), 7.57 (2H, dd, J = 6.9 Hz and J = 1.8 Hz), 7.47-7.32 (7H, m), 4.53 (1H, s), 2.51-1.90 (4H, m), 1.40 (3H, s), 1.00 (3H, s), 0.85 (3H, s); <sup>13</sup>C NMR (75 MHz, DMSO-D<sub>6</sub>)  $\delta$ : 192.7, 154.2, 150.9, 145.2, 134.9, 130.7, 128.6, 128.2, 127.8, 127.7, 123.1, 122.7, 109.2, 104.1, 49.6, 42.7, 31.3, 28.8, 25.9, 16.8; Anal. Calcd for C<sub>24</sub>H<sub>24</sub>N<sub>2</sub>O<sub>3</sub>: C, 74.21; H, 6.23; N, 7.40. Found C, 74.44; H, 6.30; N, 7.21.



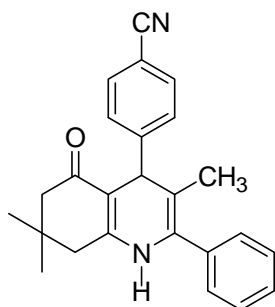

**4-(1,4,5,6,7,8-hexahydro-3,7,7-trimethyl-5-oxo-2-phenylquinolin-4-yl)benzonitrile (5i):**

Yellowish white solid, mp 244-250 °C (CH<sub>2</sub>Cl<sub>2</sub> + EtOAc, equal volumes); IR  $\nu_{\max}$  (KBr) 3434, 3067, 2951, 2869, 1681, 1576, 1530, 1349, and 1245 cm<sup>-1</sup>; <sup>1</sup>H NMR (300 MHz, DMSO-D<sub>6</sub>)  $\delta$ : 8.70 (1H, s), 7.74 (2H, dd, J = 6.6 Hz and J = 1.8 Hz), 7.50-7.31 (7H, m), 4.45 (1H, s), 2.49-1.86 (4H, m), 1.39 (3H, s), 1.06 (3H, s), 0.84 (3H, s); <sup>13</sup>C NMR (75 MHz, DMSO-D<sub>6</sub>)  $\delta$ : 192.7, 152.0, 151.0, 134.9, 131.4, 130.7, 128.6, 128.5, 128.0, 127.8, 127.7, 127.5, 118.5, 109.3, 108.0, 104.1, 49.7, 42.8, 31.3, 28.8, 25.9, 16.9; Anal. Calcd for C<sub>25</sub>H<sub>24</sub>N<sub>2</sub>O: C, 81.49; H, 6.57; N, 7.60. Found C, 81.88; H, 6.66; N, 7.62.

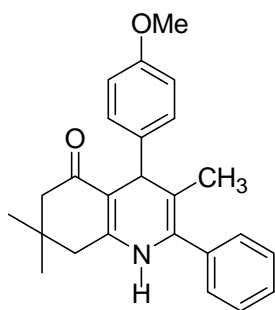

**7,8-dihydro-4-(4-methoxyphenyl)-3,7,7-trimethyl-2-phenylquinolin-5(1H,4H,6H)-one (5j):**

Yellowish white solid, mp 194-196 °C (CH<sub>2</sub>Cl<sub>2</sub> + EtOAc, equal volumes); IR  $\nu_{\max}$  (KBr) 3434, 3067, 2951, 2869, 1681, 1576, 1530, and 1349 cm<sup>-1</sup>; <sup>1</sup>H NMR (300 MHz, CDCl<sub>3</sub>)  $\delta$ : 7.52-7.20 (9H, m), 6.15 (1H, s), 4.45 (1H, s), 2.45-1.94 (4H, m), 1.53 (3H, s), 1.05 (3H, s), 0.94 (3H, s); Anal. Calcd for C<sub>25</sub>H<sub>27</sub>NO<sub>2</sub>: C, 80.40; H, 7.29; N, 3.75. Found C, 80.10; H, 7.38; N, 3.71.

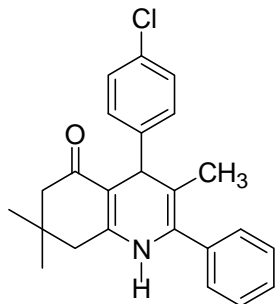

**4-(4-chlorophenyl)-7,8-dihydro-3,7,7-trimethyl-2-phenylquinolin-5(1H,4H,6H)-one (5k):**

Yellowish white solid, mp 200-202 °C; IR  $\nu_{\max}$  (KBr) 3434, 3059, 2959, 2869, 1681, 1576, 1526, and 1344  $\text{cm}^{-1}$ ;  $^1\text{H}$  NMR (300 MHz,  $\text{CDCl}_3$ )  $\delta$ : 7.40-7.29 (7H, m), 7.80 (2H, d,  $J = 7.8$  Hz), 6.25 (1H, s), 4.42 (1H, s), 3.75 (3H, s), 2.36-1.98 (4H, m), 1.54 (3H, s), 1.09 (3H, s), 0.92 (3H, s); Anal. Calcd for  $\text{C}_{24}\text{H}_{24}\text{ClNO}$ : C, 76.28; H, 6.40; N, 3.71. Found C, 76.28; H, 6.49; N, 3.58.

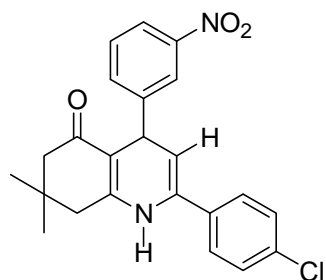

**2-(4-Chloro-phenyl)-3,7,7-trimethyl-4-(3-nitro-phenyl)-4,6,7,8-tetrahydro-1H-quinolin-5-one (5l):**

Yellow solid, mp 268-270 °C ( $\text{CH}_2\text{Cl}_2$  + EtOAc, equal volumes); IR  $\nu_{\max}$  (KBr) 3170, 3074, 1666, 1588, 1531, 1499, 1388, and 1349  $\text{cm}^{-1}$ ;  $^1\text{H}$  NMR (300 MHz,  $\text{DMSO}-d_6$ )  $\delta$ : 8.77 (1H, s), 8.00-7.95 (2H, m), 7.67 (1H, d,  $J = 7.8$  Hz), 7.56-7.41 (5H, m), 5.25 (1H, d,  $J = 5.1$  Hz), 4.72 (1H, d,  $J = 5.1$  Hz), 2.19-1.95 (4H, m), 1.00 (3H, s), 0.92 (3H, s);  $^{13}\text{C}$  NMR (75 MHz,  $\text{DMSO}-d_6$ )  $\delta$ : 194.0, 153.0, 150.3, 147.9, 134.4, 134.3, 133.7, 133.1, 129.7, 128.5, 127.6, 121.8, 120.9, 105.3, 50.3, 37.3, 32.0, 29.2, 26.8; Anal. Calcd for  $\text{C}_{23}\text{H}_{21}\text{ClN}_2\text{O}_3$ : C, 67.56; H, 5.18; N, 6.85. Found C, 67.86; H, 5.20; N, 7.00.

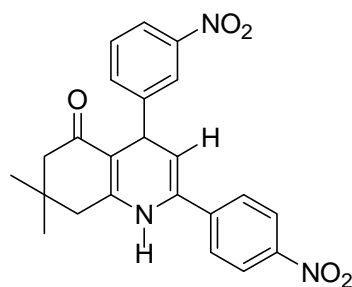

**7,8-dihydro-7,7-dimethyl-4-(3-nitrophenyl)-2-(4-nitrophenyl)quinolin-5(1H,4H,6H)-one (5m):**

Yellow solid, mp 294-296 °C ( $\text{CH}_2\text{Cl}_2$  + EtOAc, equal volumes); IR  $\nu_{\max}$  (KBr) 3188, 3074, 2964, 1661, 1589, 1531, 1499, 1388, and 1345  $\text{cm}^{-1}$ ;  $^1\text{H}$  NMR (300 MHz,  $\text{DMSO}-d_6$ )  $\delta$ : 9.90 (1H, s), 8.64 (2H, d,  $J = 8.7$  Hz), 8.45-8.33 (3H, m), 8.19 (2H, d,  $J = 9.0$  Hz), 8.12 (1H, d,  $J = 7.5$  Hz), 8.03-7.98 (2H, m), 5.92 (1H, d,  $J = 4.2$  Hz), 5.20 (1H, d,  $J = 5.1$  Hz), 2.65-2.37 (4H, m), 1.45 (3H, s), 1.37 (3H, s);  $^{13}\text{C}$  NMR (75 MHz,  $\text{DMSO}-d_6$ )  $\delta$ : 193.5, 152.4, 149.5, 149.2, 148.6, 147.2, 146.8, 146.6, 140.3, 133.9, 133.7, 133.4, 133.2, 129.2, 1218.6, 128.1, 126.2, 123.1, 121.4, 121.2,

120.4, 120.1, 110.0, 107.6, 104.6, 49.6, 36.8, 33.0, 31.6, 28.5, 28.4, 27.2, 26.2; Anal. Calcd for C<sub>23</sub>H<sub>21</sub>N<sub>3</sub>O<sub>3</sub>: C, 65.86; H, 5.05; N, 10.02. Found C, 66.06; H, 5.15; N, 10.00.

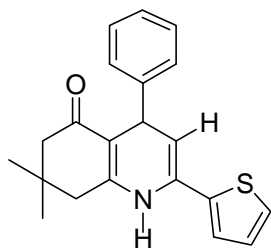

**7,8-dihydro-7,7-dimethyl-4-phenyl-2-(thiophen-2-yl)quinolin-5(1H,4H,6H)-one (5n):** yellowish white solid, mp 194-196 °C; IR  $\nu_{\max}$  (KBr) 3432, 3067, 2951, 2859, 1686, 1576, 1526, and 1344 cm<sup>-1</sup>; <sup>1</sup>H NMR (300 MHz, CDCl<sub>3</sub>)  $\delta$ : 7.32 (2H, d, J = 7.5 Hz), 7.24 (2H, t, J = 7.5 Hz), 7.19-7.10 (2H, m), 7.07 (1H, d, J = 2.4 Hz), 6.96 (1H, t, J = 3.6 Hz), 6.22 (1H, brs), 5.35 (1H, d, J = 5.1 Hz), 4.68 (1H, d, J = 5.1 Hz), 2.38-2.10 (4H, m), 1.06 (3H, s), 0.98 (3H, s); Anal. Calcd for C<sub>22</sub>H<sub>23</sub>NOS: C, 75.61; H, 6.63; N, 4.01. Found C, 75.90; H, 6.70; N, 4.21.

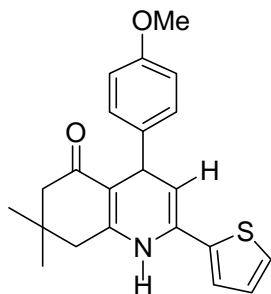

**7,8-dihydro-4-(4-methoxyphenyl)-7,7-dimethyl-2-(thiophen-2-yl)quinolin-5(1H,4H,6H)-one (5o):**

Yellowish white solid, mp 212-214 °C; IR  $\nu_{\max}$  (KBr) 3432, 3067, 2951, 2869, 1681, 1576, 1530, and 1344 cm<sup>-1</sup>; <sup>1</sup>H NMR (300 MHz, CDCl<sub>3</sub>)  $\delta$ : 7.26 (2H, d, J = 8.7 Hz), 7.20 (1H, d, J = 5.1 Hz), 7.06 (1H, d, J = 5.4 Hz), 6.99 (1H, t, J = 4.2 Hz), 6.80 (2H, d, J = 8.7 Hz), 6.07 (1H, s), 5.36-5.34 (1H, m), 4.64 (1H, d, J = 5.1 Hz), 3.77 (3H, s), 2.38-2.12 (4H, m), 1.07 (3H, s), 0.99 (3H, s); Anal. Calcd for C<sub>22</sub>H<sub>23</sub>NO<sub>2</sub>S: C, 72.30; H, 6.34; N, 3.83; O. Found C, 72.30; H, 6.34; N, 3.83; O.

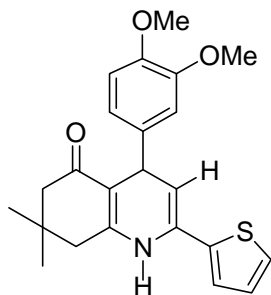

**7,8-dihydro-4-(3,4-dimethoxyphenyl)-7,7-dimethyl-2-(thiophen-2-yl)quinolin-5(1H,4H,6H)-one (5p):**

Yellowish white solid, mp 222-224 °C; IR  $\nu_{\max}$  (KBr) 3438, 3057, 2951, 2869, 1681, 1579, 1530, and 1346  $\text{cm}^{-1}$ ;  $^1\text{H}$  NMR (300 MHz,  $\text{CDCl}_3$ )  $\delta$ : 7.20 (1H, d,  $J = 5.1$  Hz), 7.10 (1H, d,  $J = 3.3$ , Hz), 6.98 (1H, t,  $J = 4.5$  Hz), 6.86 (1H, d,  $J = 8.1$  Hz), 6.77 (1H, d,  $J = 8.4$  Hz), 6.19 (1H, s), 5.38-5.36 (1H, m), 4.65 (1H, d,  $J = 5.4$  Hz), 3.80 (3H, s), 3.76 (3H, s), 2.40-2.04 (4H, m), 1.08 (3H, s), 1.01 (3H, s); Anal. Calcd for  $\text{C}_{23}\text{H}_{25}\text{NO}_3\text{S}$ : C, 69.84; H, 6.37; N, 3.54. Found C, 70.03; H, 6.47; N, 3.54.

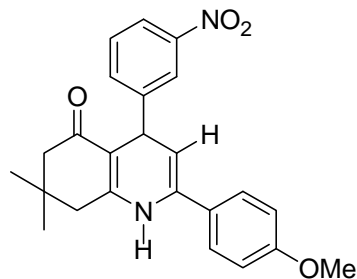

**7,8-dihydro-2-(4-methoxyphenyl)-7,7-dimethyl-4-(3-nitrophenyl)quinolin-5(1H,4H,6H)-one (5q):**

Yellow solid, mp 184-186 °C ( $\text{CH}_2\text{Cl}_2 + \text{EtOAc}$ , equal volumes); IR  $\nu_{\max}$  (KBr) 3180, 3074, 2964, 1661, 1589, 1531, 1499, 1388, and 1345  $\text{cm}^{-1}$ ;  $^1\text{H}$  NMR (300 MHz,  $\text{DMSO}-d_6$ )  $\delta$ : 8.69 (1H, s), 8.00-7.93 (2H, m), 7.67 (1H, d,  $J = 7.5$  Hz), 7.58-7.48 (1H, m), 7.39 (2H, d,  $J = 8.7$  Hz), 6.91 (2H, d,  $J = 9.0$  Hz), 5.11 (1H, d,  $J = 6.6$  Hz), 4.70 (1H, d,  $J = 5.4$  Hz), 3.72 (3H, s), 2.19-1.93 (4H, m), 1.00 (3H, s), 0.95 (3H, s);  $^{13}\text{C}$  NMR (75 MHz,  $\text{DMSO}-d_6$ )  $\delta$ : 193.9, 159.6, 155.0, 150.7, 147.8, 135.1, 134.2, 129.6, 127.3, 127.1, 122.5, 121.8, 120.7, 120.4, 113.9, 111.9, 105.4, 103.3, 55.3, 50.3, 37.3, 31.7, 29.2, 28.0, 26.8; Anal. Calcd for  $\text{C}_{24}\text{H}_{24}\text{N}_2\text{O}_4$ : C, 71.27; H, 5.98; N, 6.93. Found C, 71.51; H, 5.88; N, 6.90.

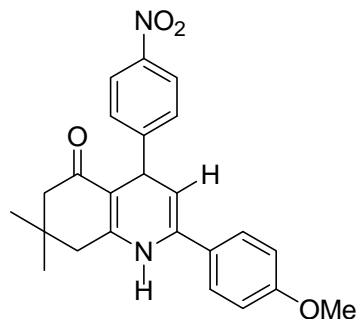

**7,8-dihydro-2-(4-methoxyphenyl)-7,7-dimethyl-4-(4-nitrophenyl)quinolin-5(1H,4H,6H)-one (5r):**

Yellow solid, mp 194-196 °C ( $\text{CH}_2\text{Cl}_2 + \text{EtOAc}$ , equal volumes); IR  $\nu_{\max}$  (KBr) 3431, 3069, 2951, 2869, 1681, 1576, 1530, and 1333  $\text{cm}^{-1}$ ;  $^1\text{H}$  NMR (300 MHz,  $\text{DMSO}-d_6$ )  $\delta$ : 8.34 (1H, s), 8.13 (2H, d,  $J = 8.4$  Hz), 7.50-7.41 (4H, m), 6.95 (2H, d,  $J = 8.7$  Hz), 5.10 (1H, d,  $J = 4.5$  Hz), 4.72 (1H, d,  $J = 5.4$  Hz), 3.77 (3H, s), 2.21-1.98 (4H, m), 1.04

(3H, s), 0.95 (3H, s);  $^{13}\text{C}$  NMR (75 MHz, DMSO- $\text{D}_6$ )  $\delta$ : 193.2, 158.9, 155.4, 152.4, 145.0, 134.4, 128.9, 128.4, 127.9, 126.7, 126.4, 122.9, 122.3, 113.7, 113.2, 104.5, 102.4, 54.7, 49.7, 37.1, 31.3, 28.5, 27.2, 26.4; Anal. Calcd for  $\text{C}_{24}\text{H}_{24}\text{N}_2\text{O}_4$ : C, 71.27; H, 5.98; N, 6.93. Found C, 71.57; H, 5.91; N, 6.71.

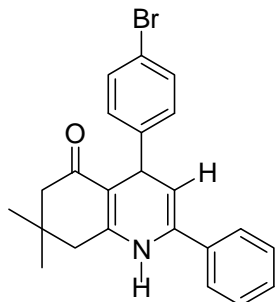

**4-(4-Bromo-phenyl)-3,7,7-trimethyl-2-phenyl-4,6,7,8-tetrahydro-1H-quinolin-5-one (5s):**

Yellow solid, mp 164-166 °C ( $\text{CH}_2\text{Cl}_2$  + EtOAc, equal volumes); IR  $\nu_{\text{max}}$  (KBr) 3434, 3067, 2951, 2869, 1681, 1577, 1525, and 1335  $\text{cm}^{-1}$ ;  $^1\text{H}$  NMR (300 MHz,  $\text{CDCl}_3$ )  $\delta$ : 7.38-7.36 (7H, m), 7.25-7.22 (2H, m), 5.96 (1H, br s), 5.23 (1H, d,  $J = 4.8$  Hz), 4.70 (1H, d,  $J = 5.1$  Hz), 2.42-2.04 (4H, m), 1.00 (3H, s), 0.91 (3H, s);  $^{13}\text{C}$  NMR (75 MHz,  $\text{CDCl}_3$ )  $\delta$ : 195.4, 162.3, 150.7, 146.6, 135.6, 134.4, 131.3, 129.7, 128.9, 125.1, 119.8, 108.1, 106.4, 50.7, 42.1, 37.3, 32.5, 29.4, 27.4; Anal. Calcd for  $\text{C}_{24}\text{H}_{24}\text{BrNO}$ : C, 68.25; H, 5.73; N, 3.32. Found C, 68.25; H, 5.73; N, 3.32.

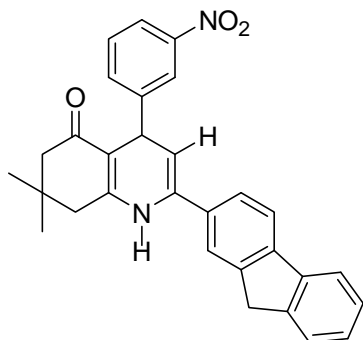

**2-(9H-fluoren-2-yl)-7,8-dihydro-7,7-dimethyl-4-(3-nitrophenyl)quinolin-5-one (5t):**

Yellow solid, mp 194-196 °C; IR  $\nu_{\text{max}}$  (KBr) 3433, 3067, 2951, 2869, 1681, 1577, 1525, and 1344  $\text{cm}^{-1}$ ;  $^1\text{H}$  NMR (300 MHz,  $\text{CDCl}_3$ )  $\delta$ : 8.21 (1H, s), 8.00 (1H, dd,  $J = 8.1$  Hz and  $J = 1.2$  Hz), 7.80-7.73 (3H, m), 7.59-7.54 (2H, m), 7.45-7.30 (4H, m), 6.06 (1H, s), 5.29-5.26 (1H, m), 5.14 (1H, d,  $J = 5.1$  Hz), 3.90 (2H, s), 2.55-2.15 (4H, m), 1.12 (3H, s), 1.04 (3H, s);  $^{13}\text{C}$  NMR (75 MHz,  $\text{CDCl}_3$ )  $\delta$ : 194.5, 149.7, 148.7, 144.0, 143.4, 142.7, 140.8, 135.4, 134.2, 133.7, 129.0, 127.3, 127.0, 125.1, 124.0, 122.8, 122.0, 121.2, 120.2, 107.2, 105.4, 50.6, 42.1, 38.0, 36.9, 32.6, 29.3, 27.4; Anal. Calcd for  $\text{C}_{34}\text{H}_{30}\text{N}_2\text{O}_3$ : C, 87.52; H, 6.52; N, 6.96. Found C, 87.70; H, 6.60; N, 7.00.

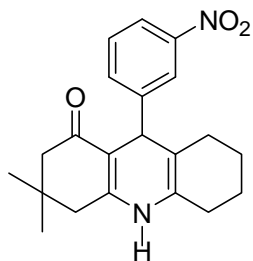

**3,3-Dimethyl-9-(3-nitrophenyl)-3,4,5,6,7,8,9,10-octahydro-2H-acridin-1-one (5u):**

Brown liquid, IR  $\nu_{\max}$  (Neat) 3434, 3067, 2951, 2869, 1681, 1576, 1530, and 1349  $\text{cm}^{-1}$ ;  $^1\text{H}$  NMR (300 MHz, DMSO- $\text{D}_6$ )  $\delta$ : 8.34 (1H, s), 7.96-7.93 (2H, m), 7.60 (2H, d,  $J = 7.5$  Hz), 7.49 (1H, t,  $J = 7.8$  Hz), 4.30 (1H, s), 2.37-2.21 (2H, m), 2.10-2.05 (3H, m), 1.90-1.85 (1H, m), 1.79-1.74 (1H, m), 1.63 (2H, br s), 1.44 (3H, br s), 0.97 (3H, s), 0.84 (3H, s);  $^{13}\text{C}$  NMR (75 MHz, DMSO- $\text{D}_6$ )  $\delta$ : 193.2, 151.4, 149.8, 147.7, 134.3, 129.3, 128.3, 121.8, 120.7, 110.4, 105.1, 50.2, 42.3, 32.0, 29.2, 26.7, 25.6, 22.4, 22.0; Anal. Calcd for  $\text{C}_{21}\text{H}_{24}\text{N}_2\text{O}_3$ : C, 71.57; H, 6.86; N, 7.95. Found C, 71.70; H, 6.86; N, 7.90.

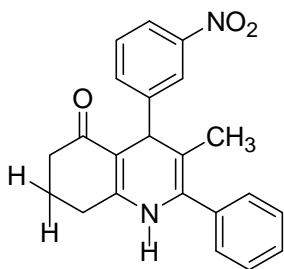

**7,8-dihydro-3-methyl-4-(3-nitrophenyl)-2-phenylquinolin-5(1H,4H,6H)-one (5v):**

Yellow solid, mp 236-238  $^{\circ}\text{C}$  ( $\text{CH}_2\text{Cl}_2$  + EtOAc, equal volumes); IR  $\nu_{\max}$  (KBr) 3438, 3077, 2961, 1681, 1576, 1530, and 1325  $\text{cm}^{-1}$ ;  $^1\text{H}$  NMR (300 MHz,  $\text{CDCl}_3$ )  $\delta$ : 8.35 (1H, s), 8.04 (1H, d,  $J = 6.6$  Hz), 7.82 (1H, d,  $J = 7.8$  Hz), 7.47-7.36 (6H, m), 5.89 (1H, br s), 4.71 (1H, s), 2.52-2.46 (2H, m), 2.36-2.32 (2H, m), 2.09-1.85 (2H, m), 1.54 (3H, s);  $^{13}\text{C}$  NMR (75 MHz,  $\text{CDCl}_3$ )  $\delta$ : 195.5, 151.6, 148.7, 135.8, 134.8, 130.8, 128.8, 122.7, 121.3, 111.9, 108.4, 43.1, 36.9, 27.9, 21.4, 17.5; Anal. Calcd for  $\text{C}_{22}\text{H}_{20}\text{N}_2\text{O}_3$ : C, 73.32; H, 5.59; N, 7.77. Found C, 73.32; H, 5.59; N, 7.77.

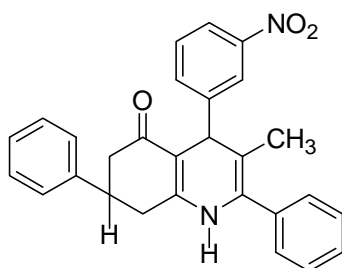

**7,8-dihydro-3-methyl-4-(3-nitrophenyl)-2,7-diphenylquinolin-5(1H,4H,6H)-one (5w):**

Yellow solid, mp 200-202 °C (CH<sub>2</sub>Cl<sub>2</sub> + EtOAc, equal volumes); IR  $\nu_{\text{max}}$  (KBr) 3432, 3071, 2951, 2868, 1681, 1577, 1525, and 1344 cm<sup>-1</sup>; <sup>1</sup>H NMR (300 MHz, CDCl<sub>3</sub>)  $\delta$ : 8.15 (1H, d, J = 1.8 Hz), 7.99 (1H, dd, J = 9.9 Hz and J = 0.9 Hz), 7.72 (1H, d, J = 7.5 Hz), 7.45-7.08 (11H, m), 5.86 (1H, br s), 4.66 (1H, s), 3.47-3.42 (1H, m), 2.84-2.48 (4H, m), 1.49 (3H, s); <sup>13</sup>C NMR (75 MHz, CDCl<sub>3</sub>)  $\delta$ : 194.3, 150.5, 148.7, 148.2, 142.6, 135.7, 134.7, 130.7, 128.9, 128.8, 128.6, 126.9, 126.7, 122.7, 121.3, 112.1, 108.2, 43.4, 39.3, 35.2, 30.9, 17.5; Anal. Calcd for C<sub>28</sub>H<sub>24</sub>N<sub>2</sub>O<sub>3</sub>: C, 77.04; H, 5.54; N, 6.42. Found C, 77.14; H, 5.54; N, 6.58.

### <sup>1</sup>H NMR and <sup>13</sup>C NMR spectra for 5a-5w

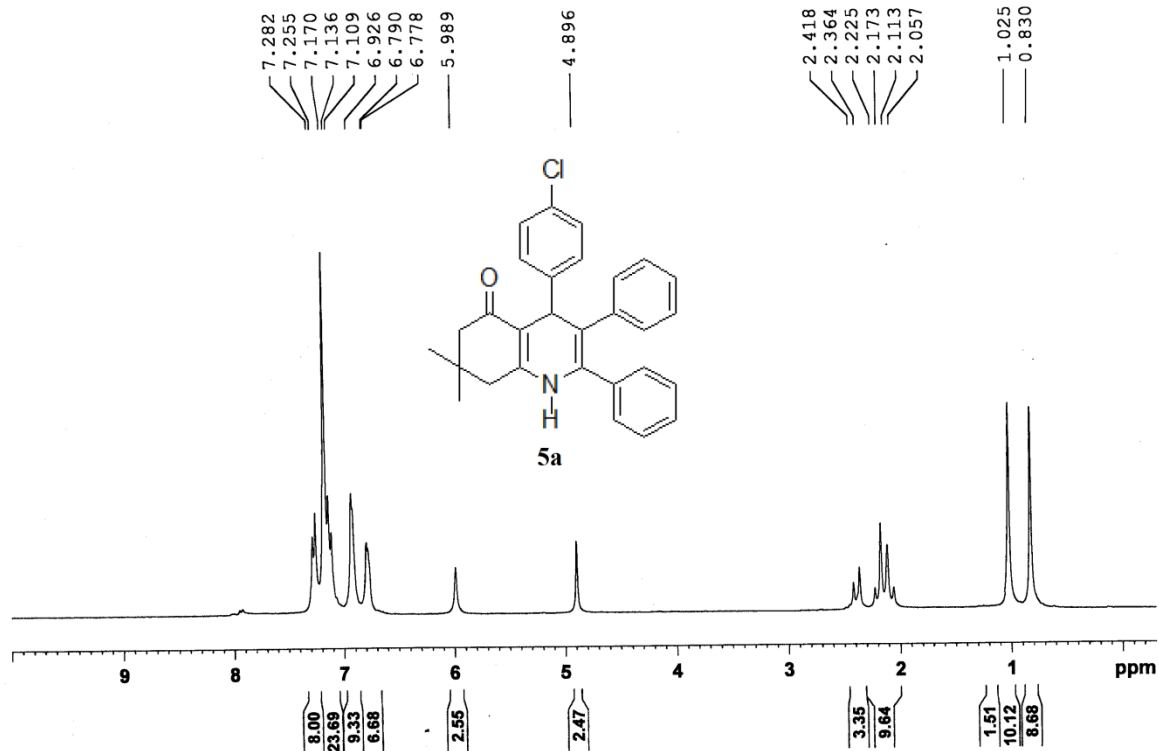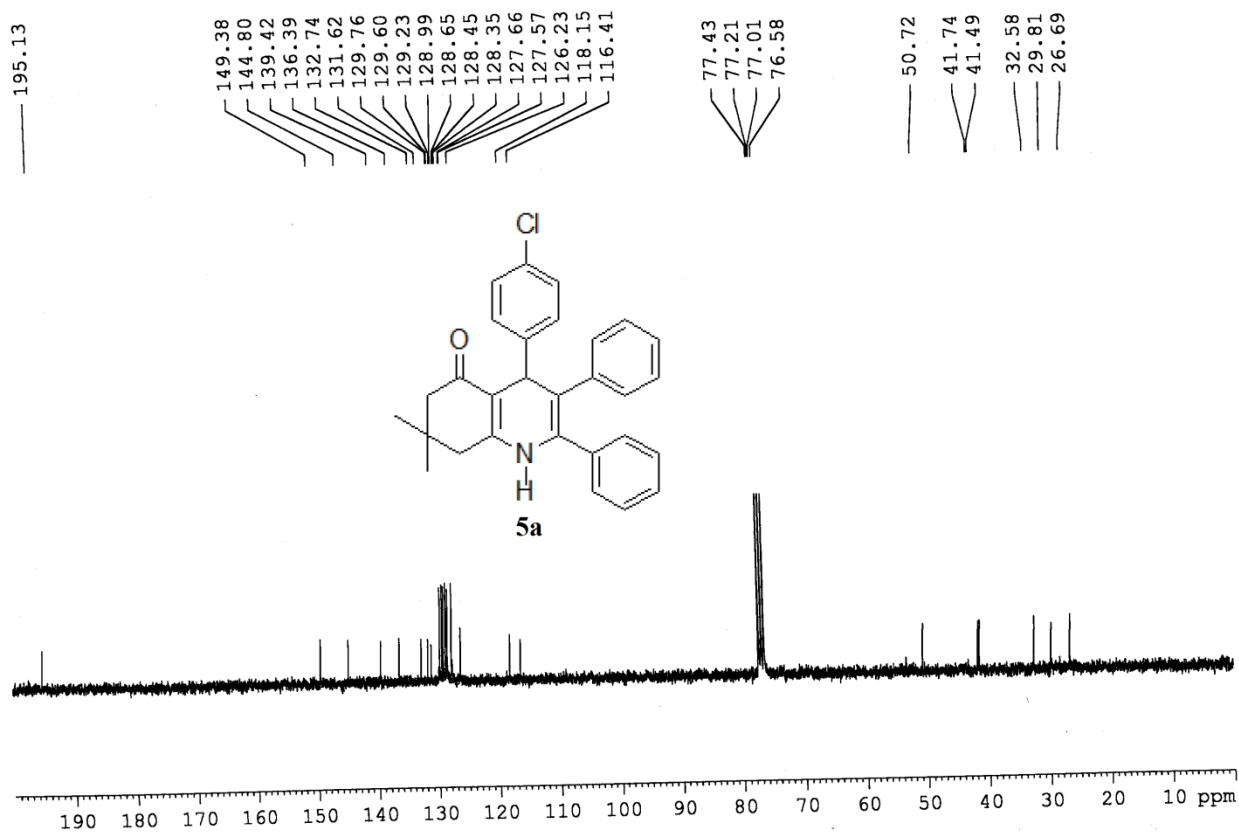



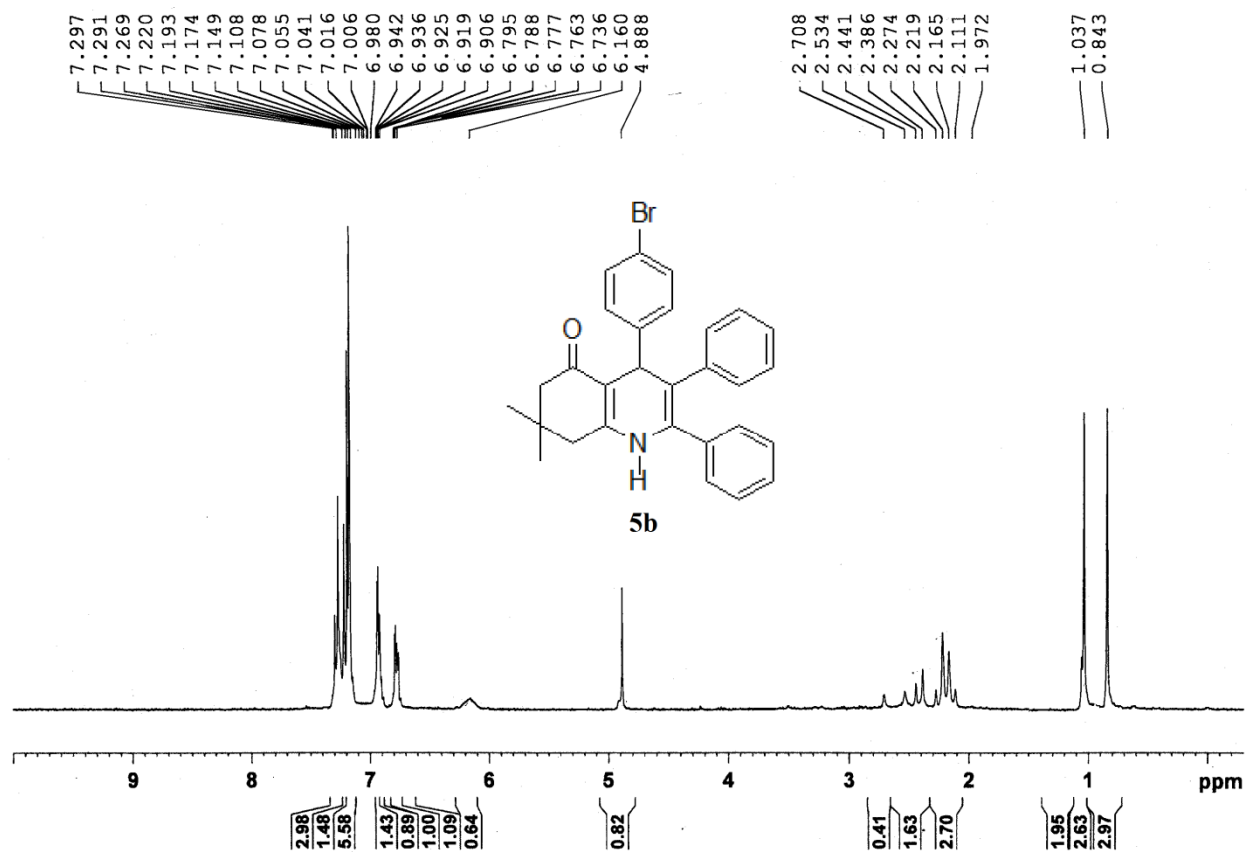

C13DEPTQ135-C

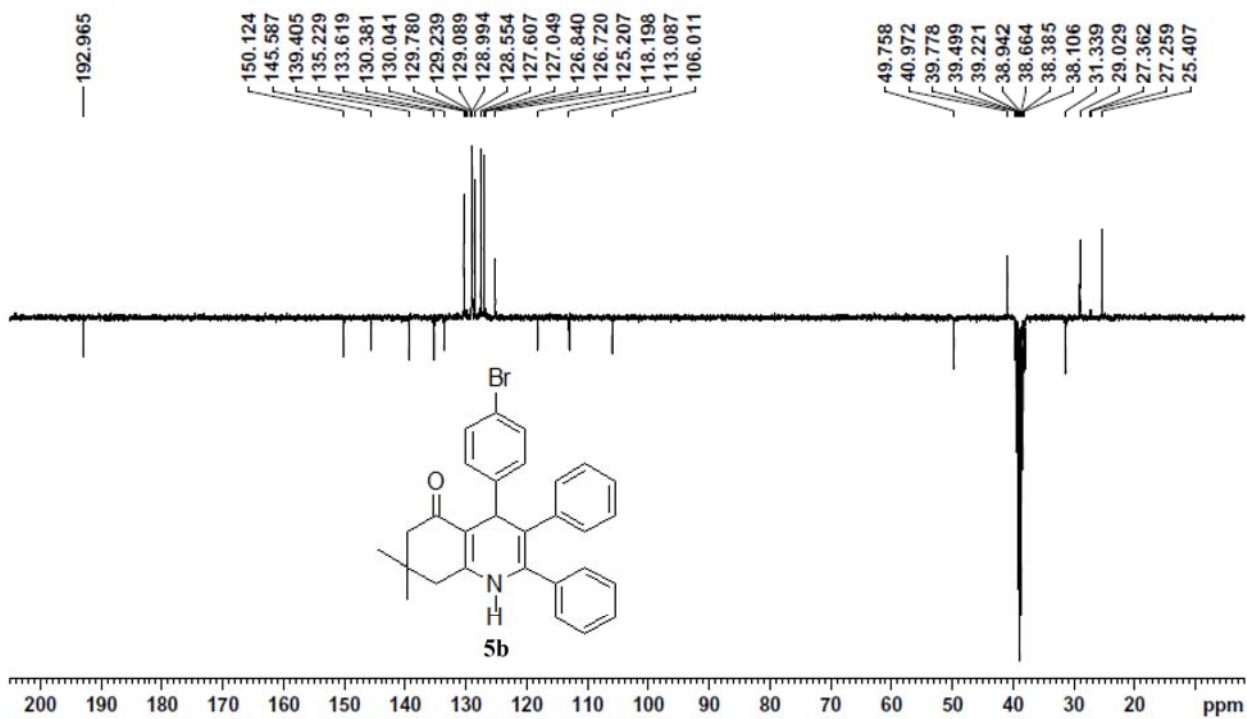

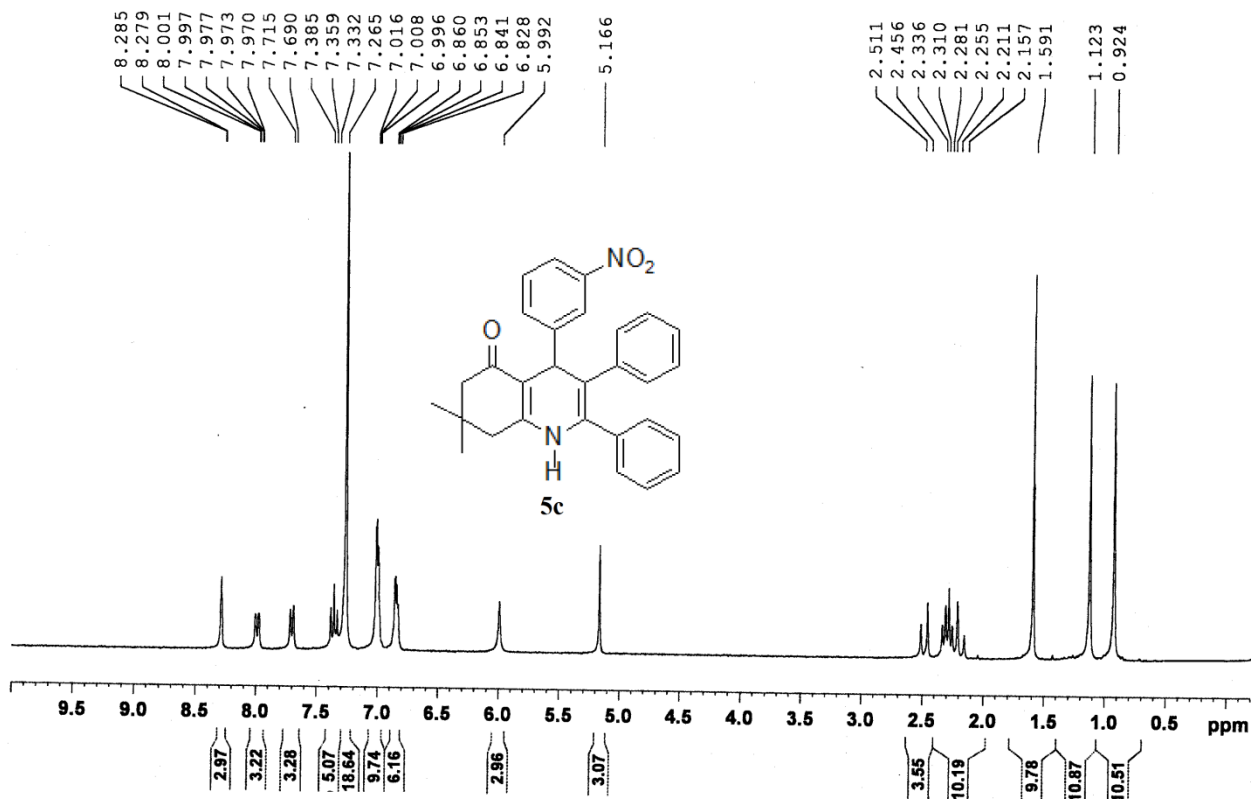

C13DEPTQ135-C DMSO {C:\Bruker\DATA\chhanda} nmrsu 7

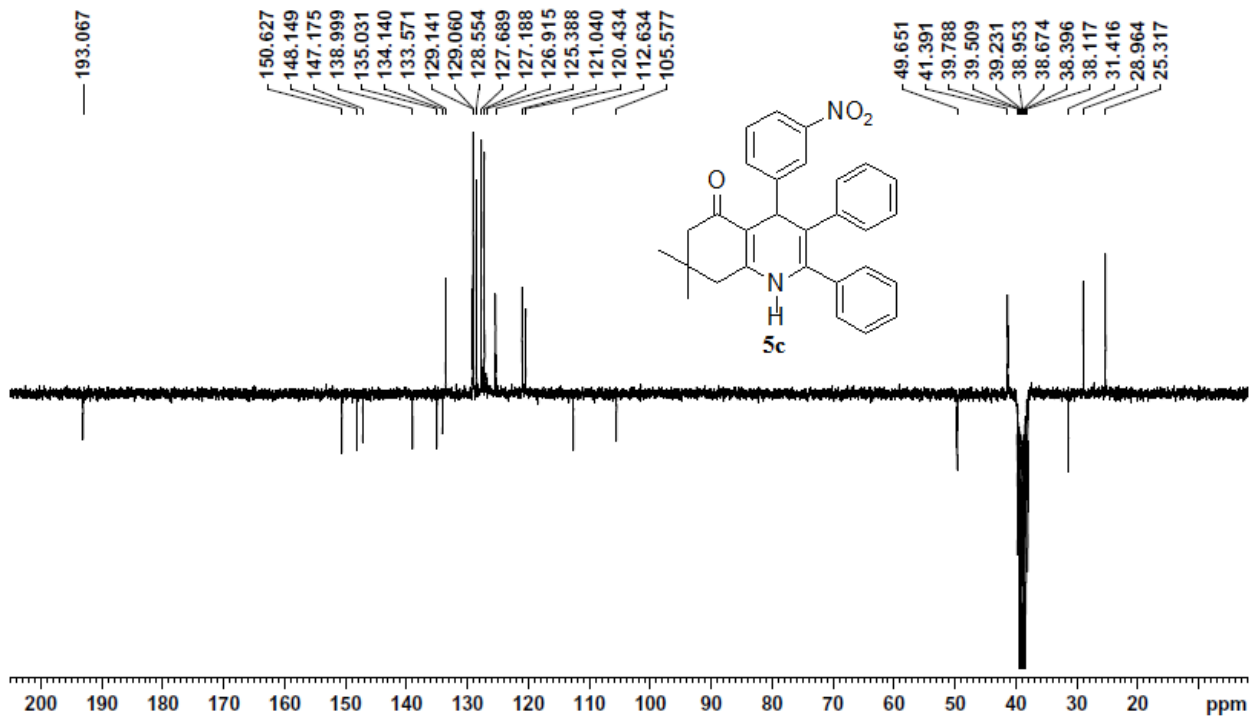

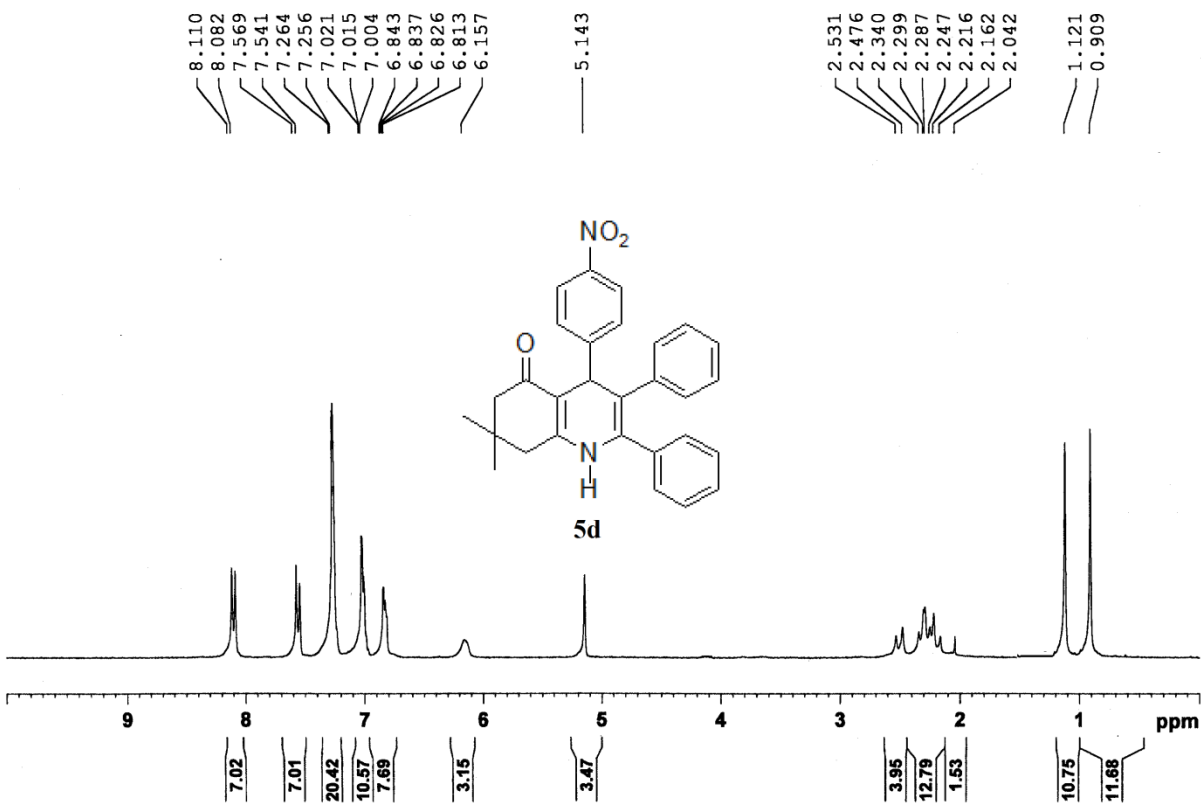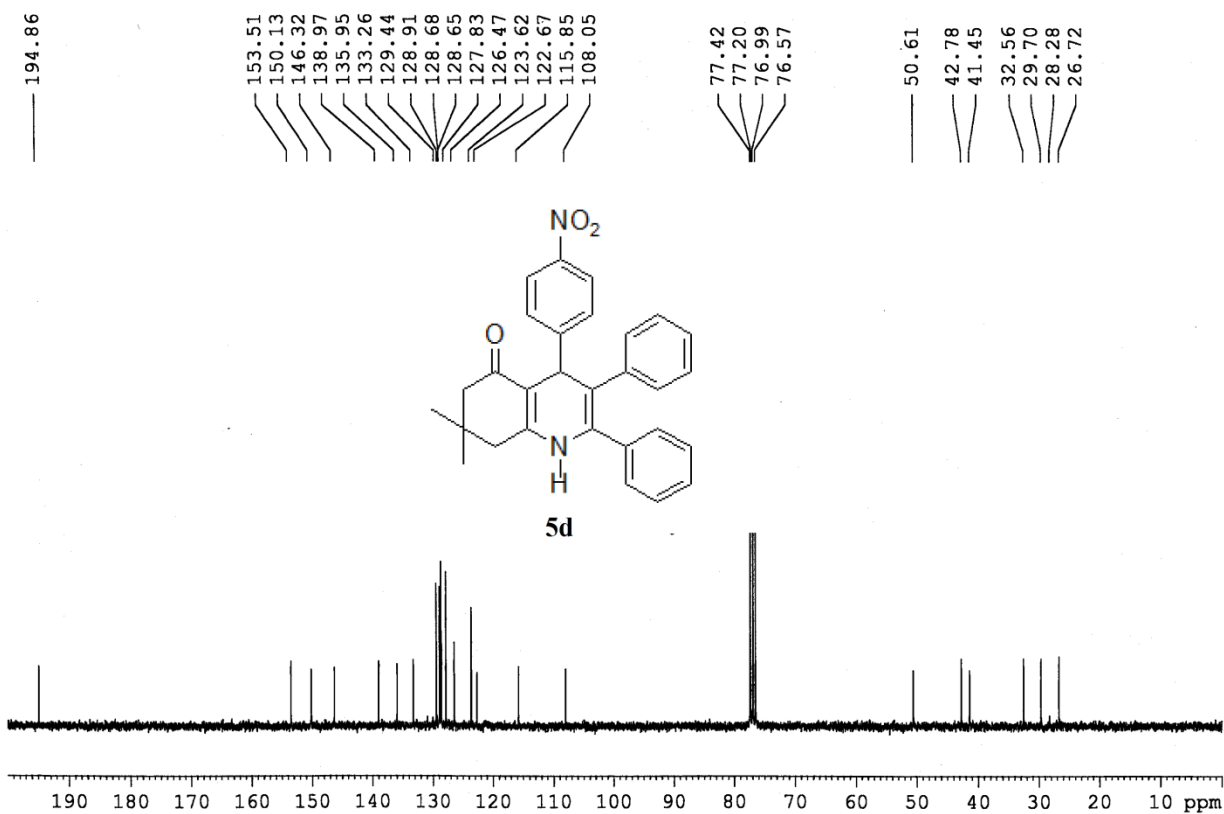

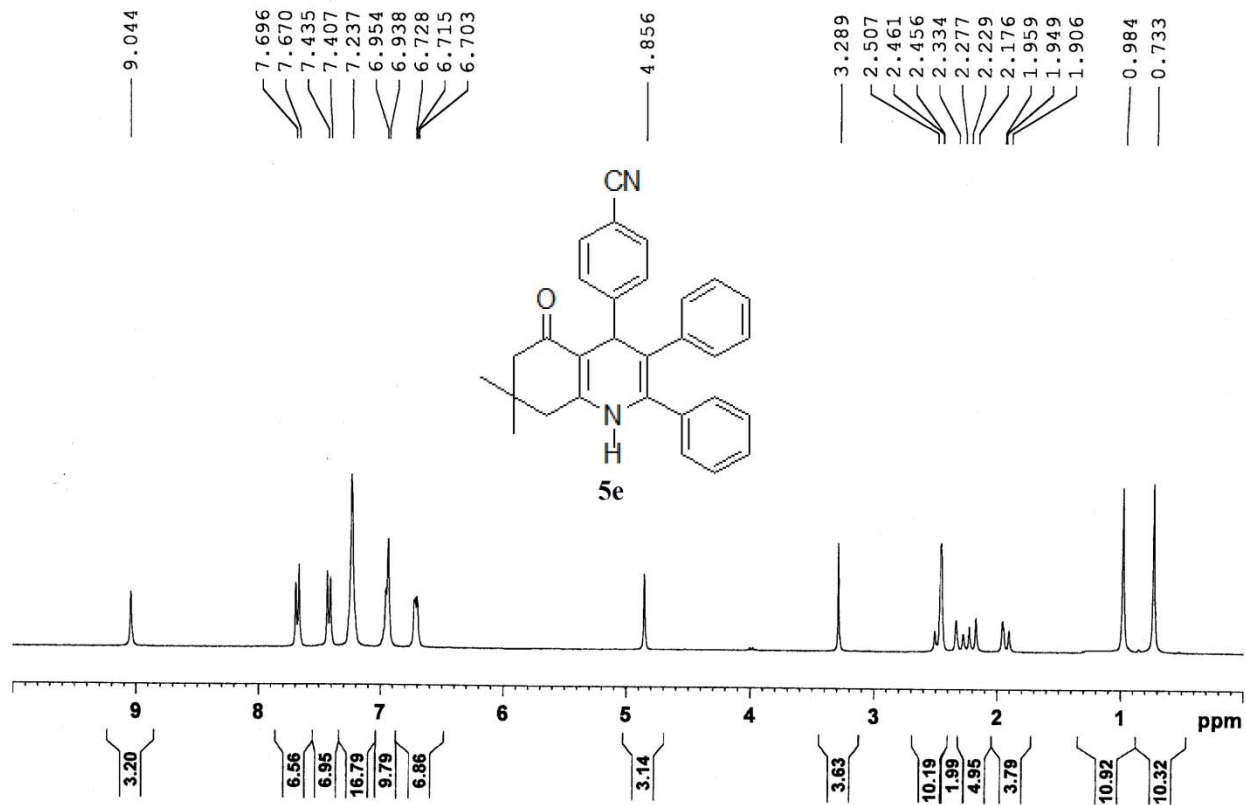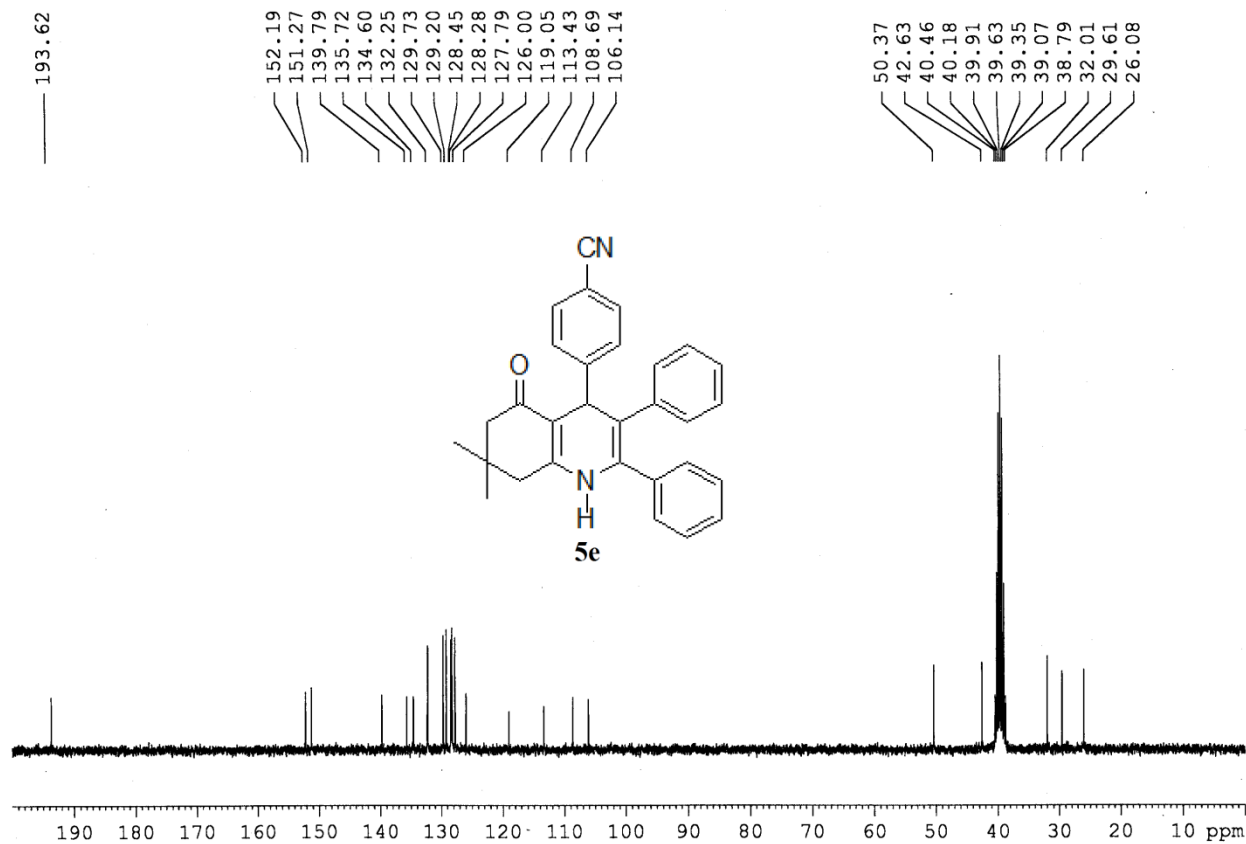

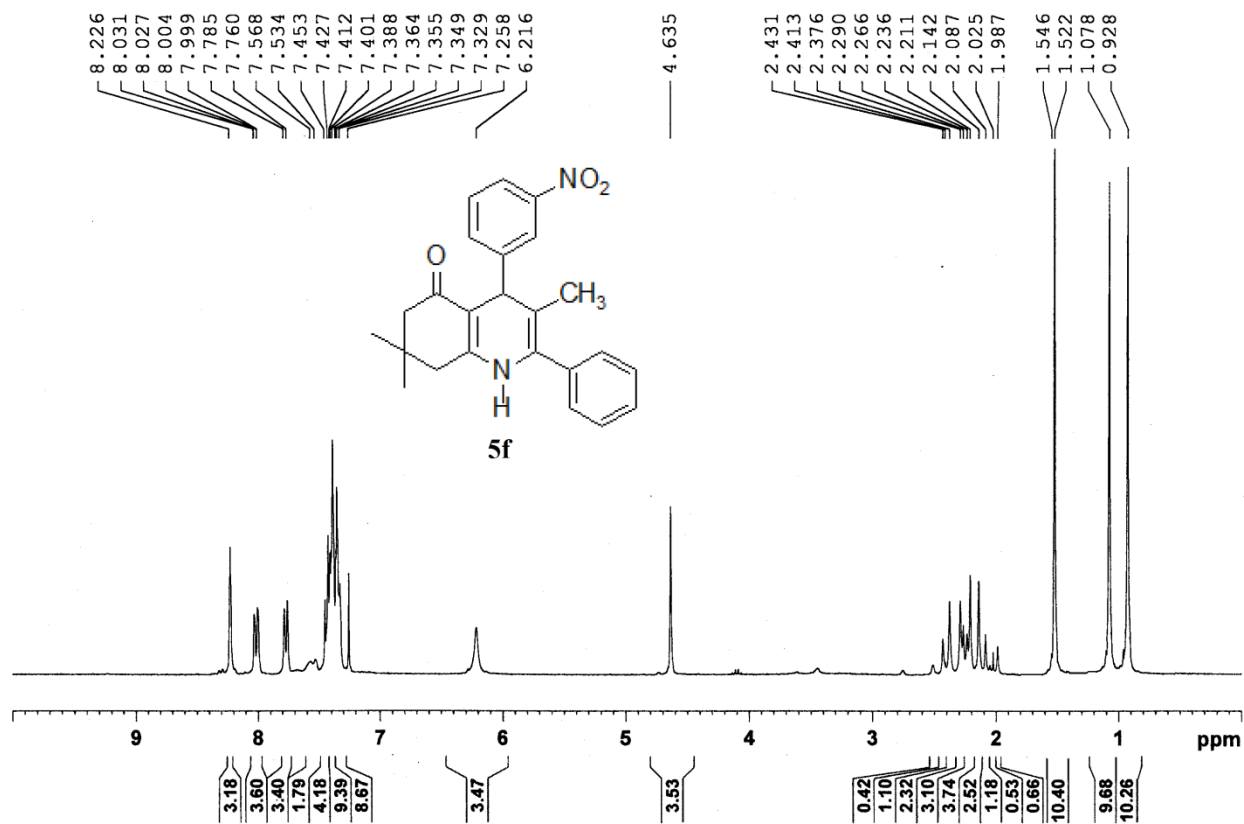

C13DEPTQ135-C DMSO (C:\Bruker\DATA\chhanda) nmrsu 6

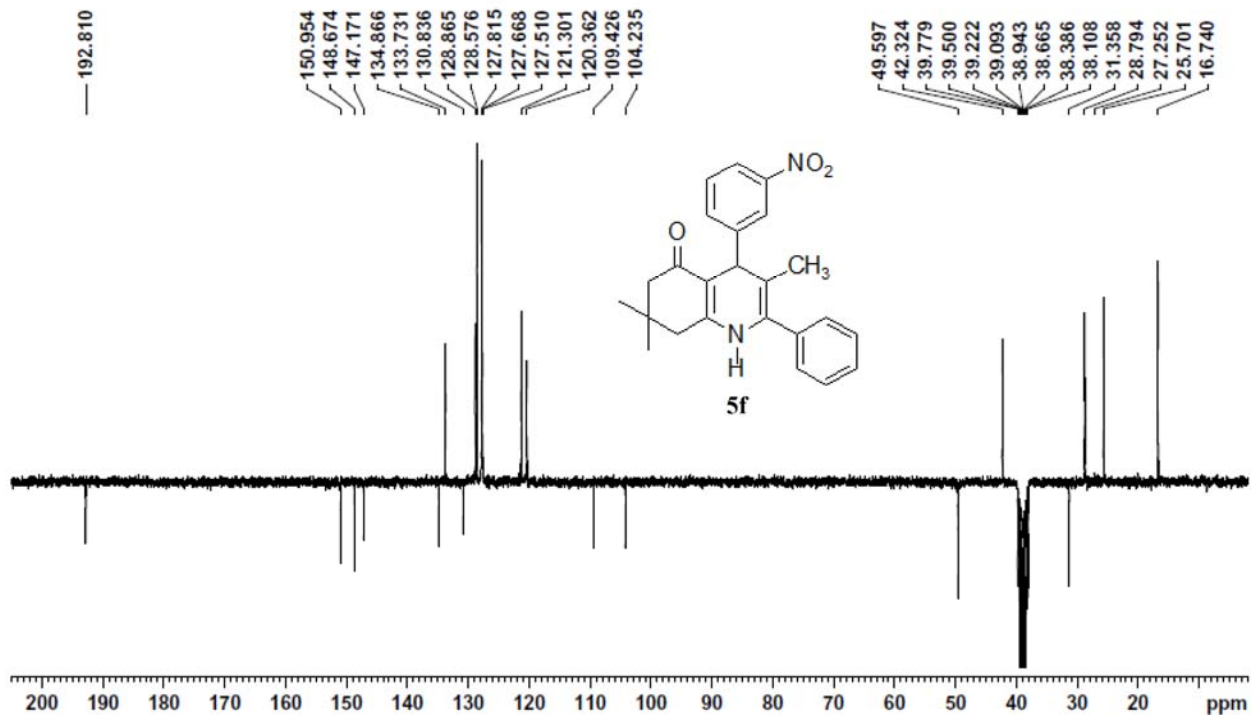

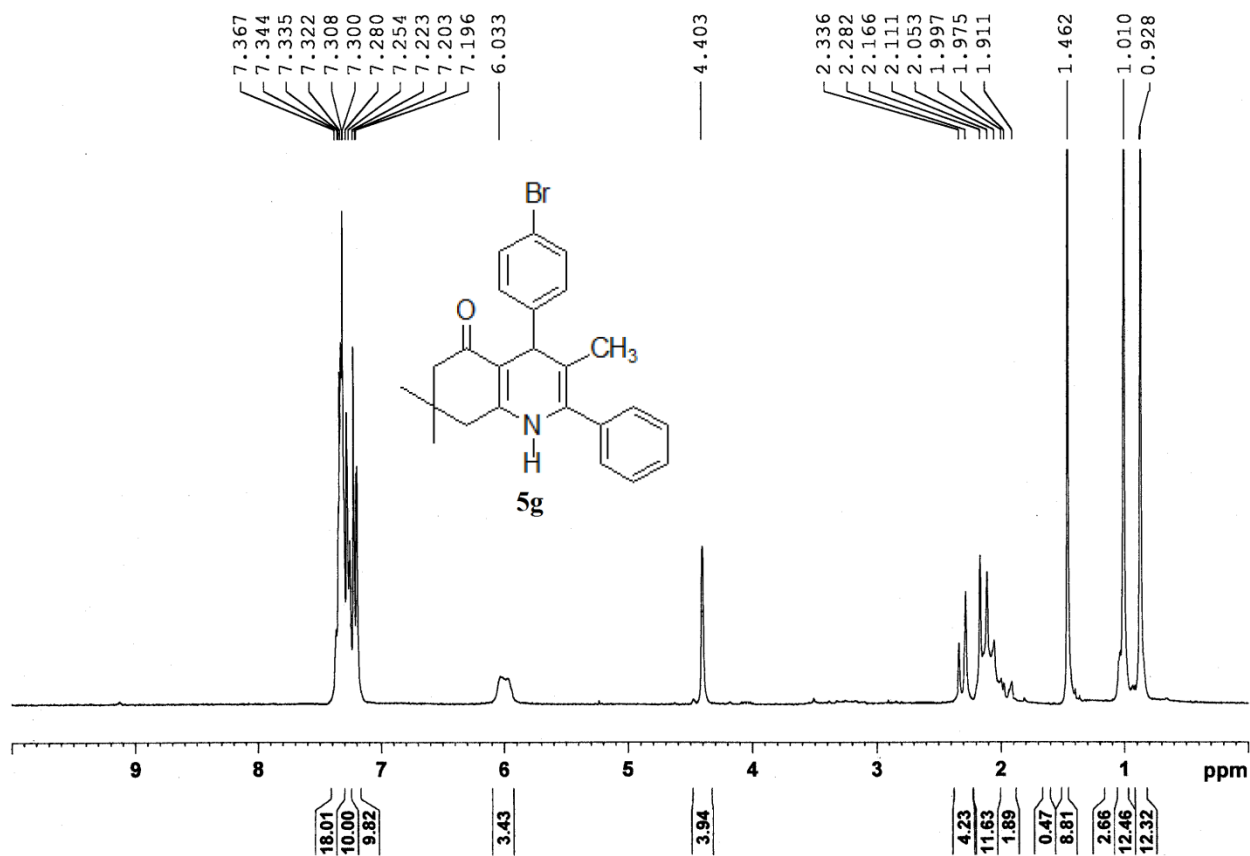

C13DEPTQ135-C DMSO (C:\Bruker\DATA\chhanda) nmrsu 5

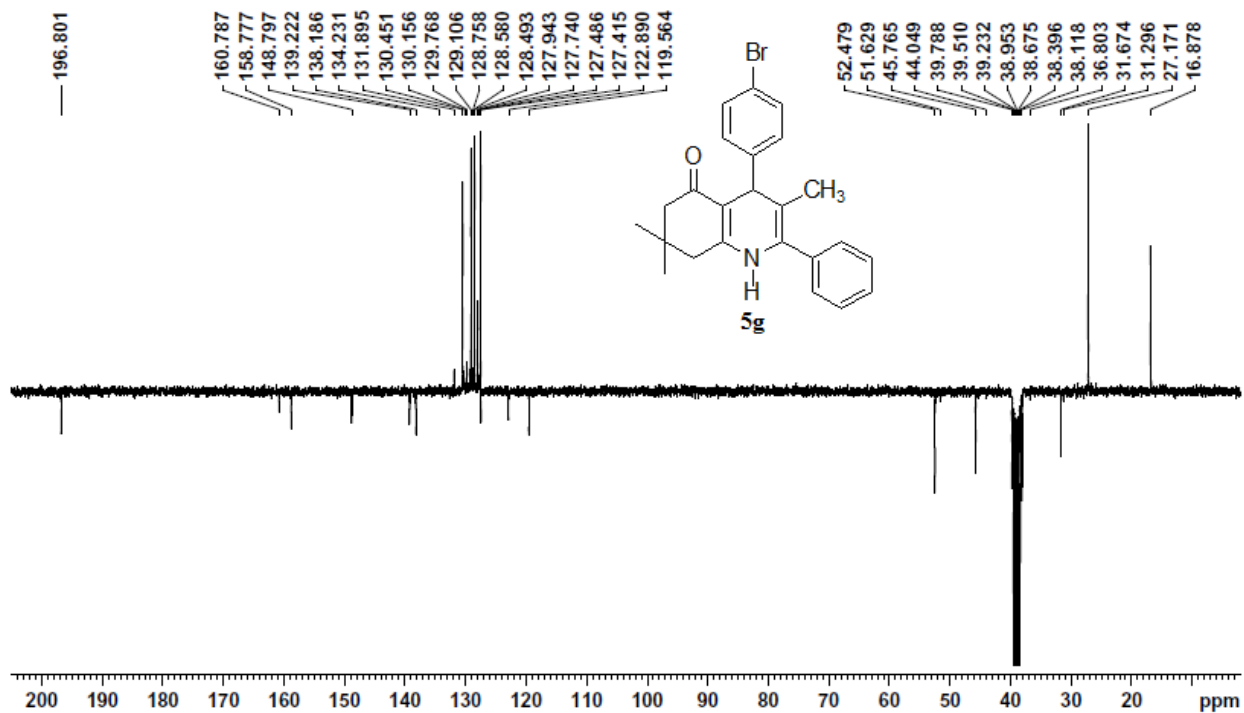

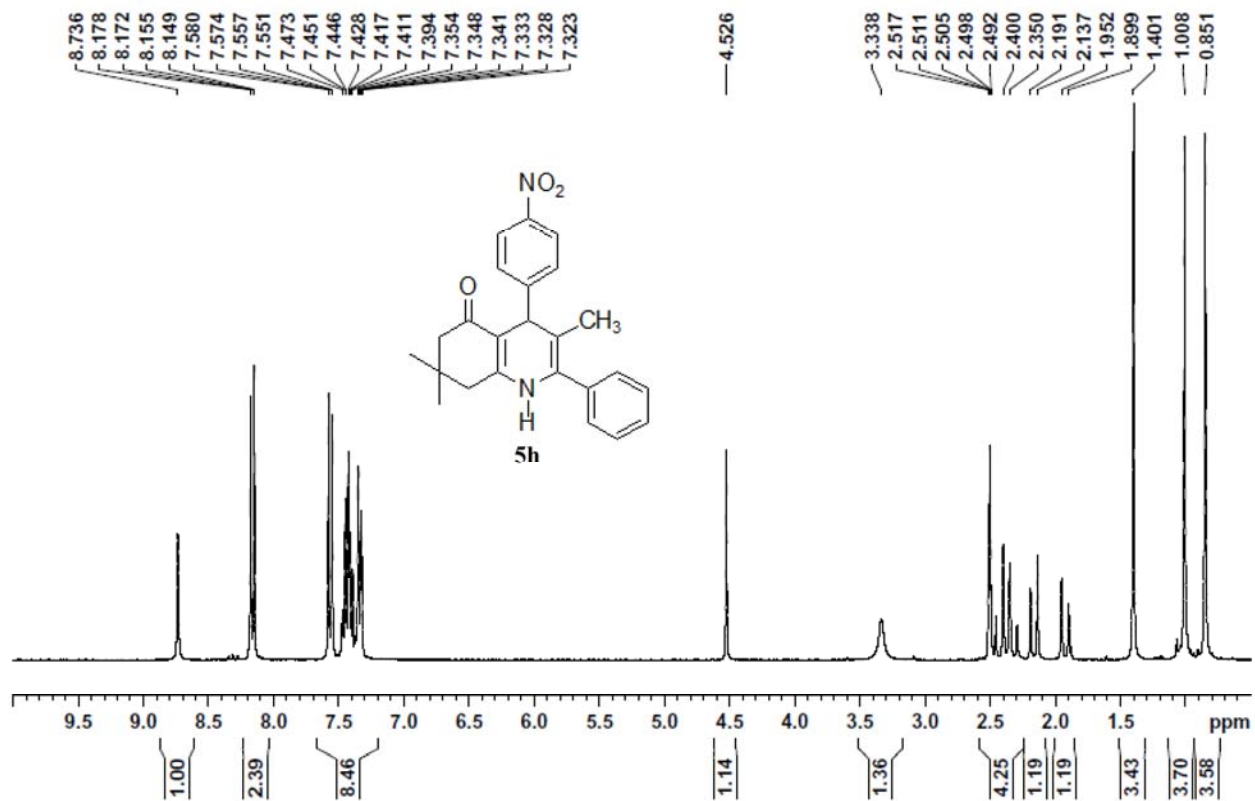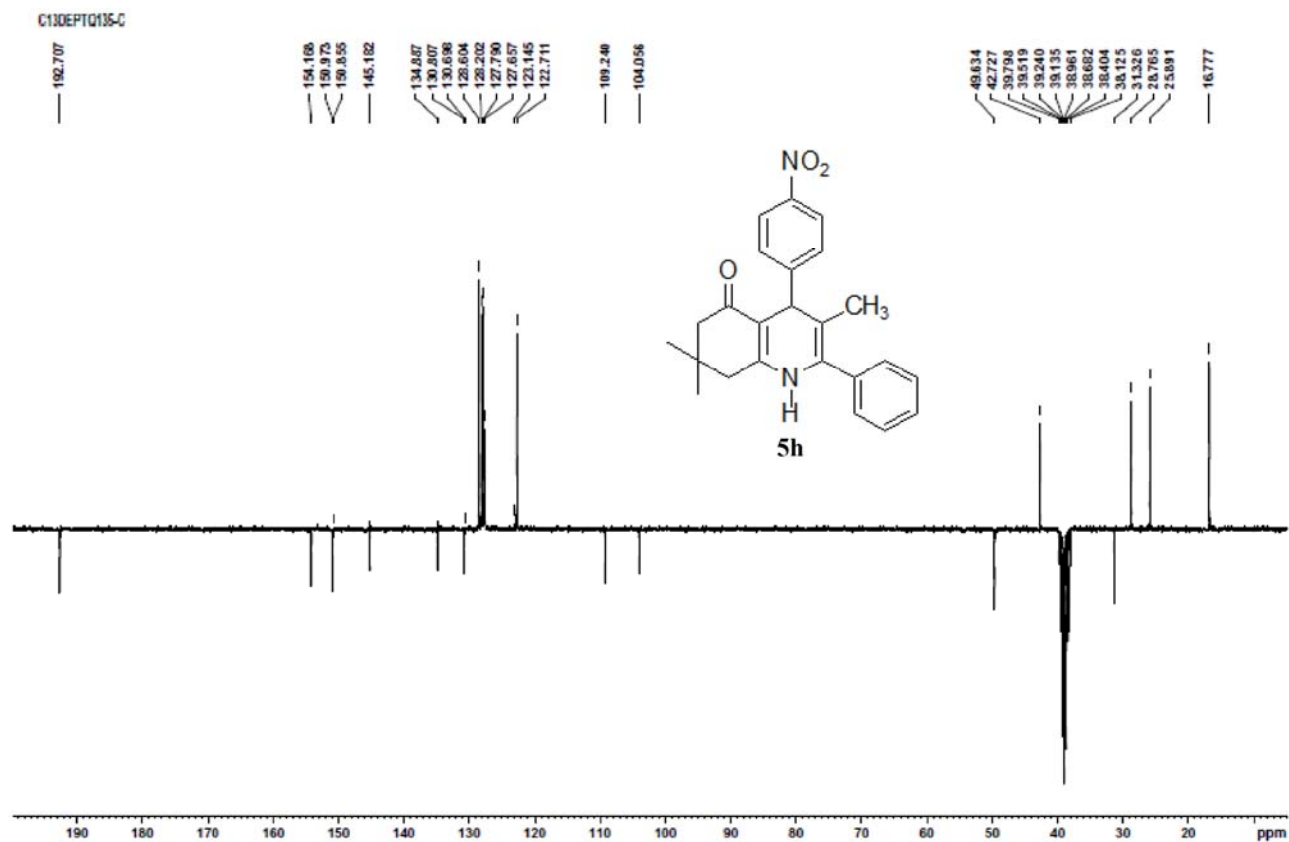

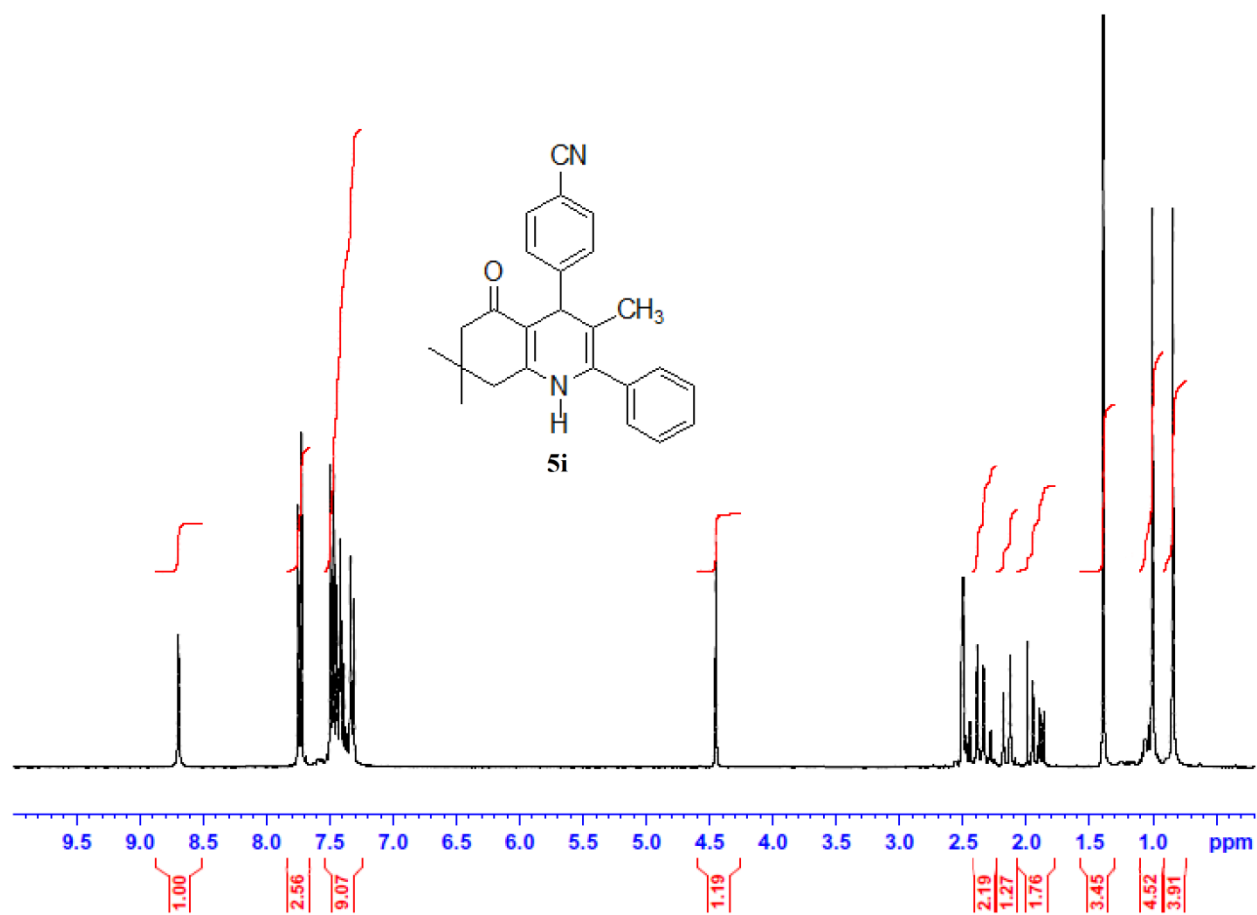

C13DEPTQ135-C

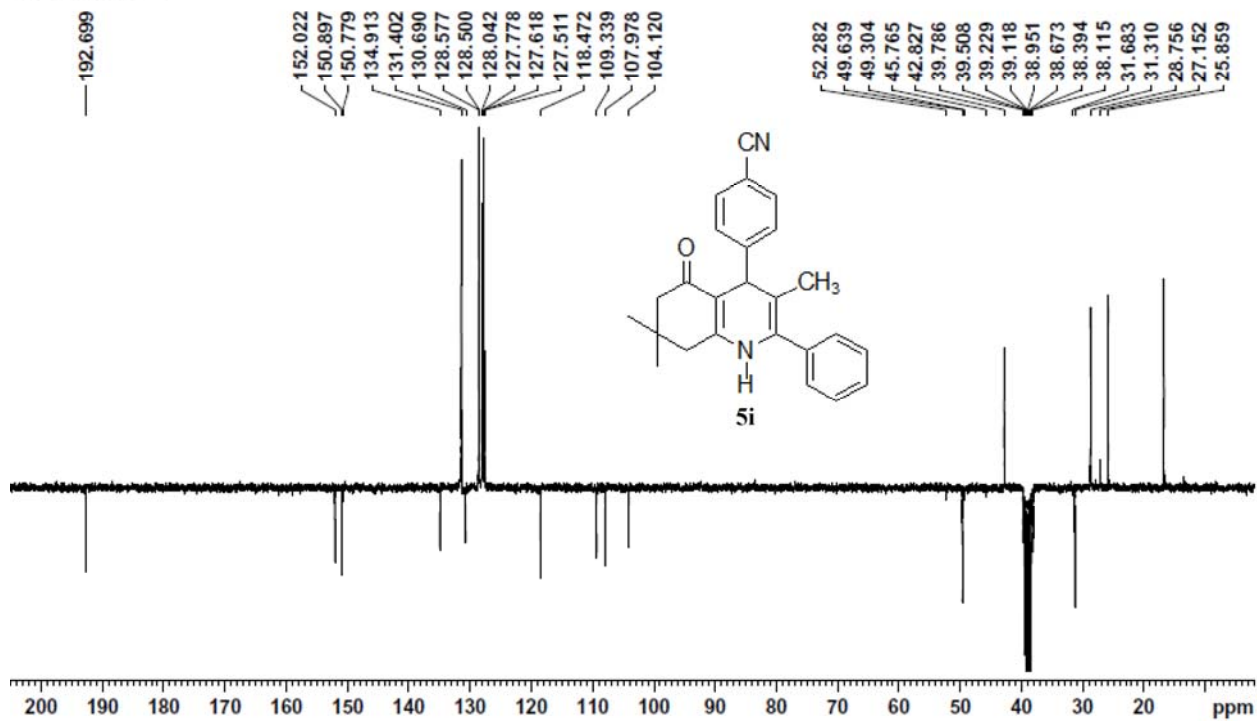



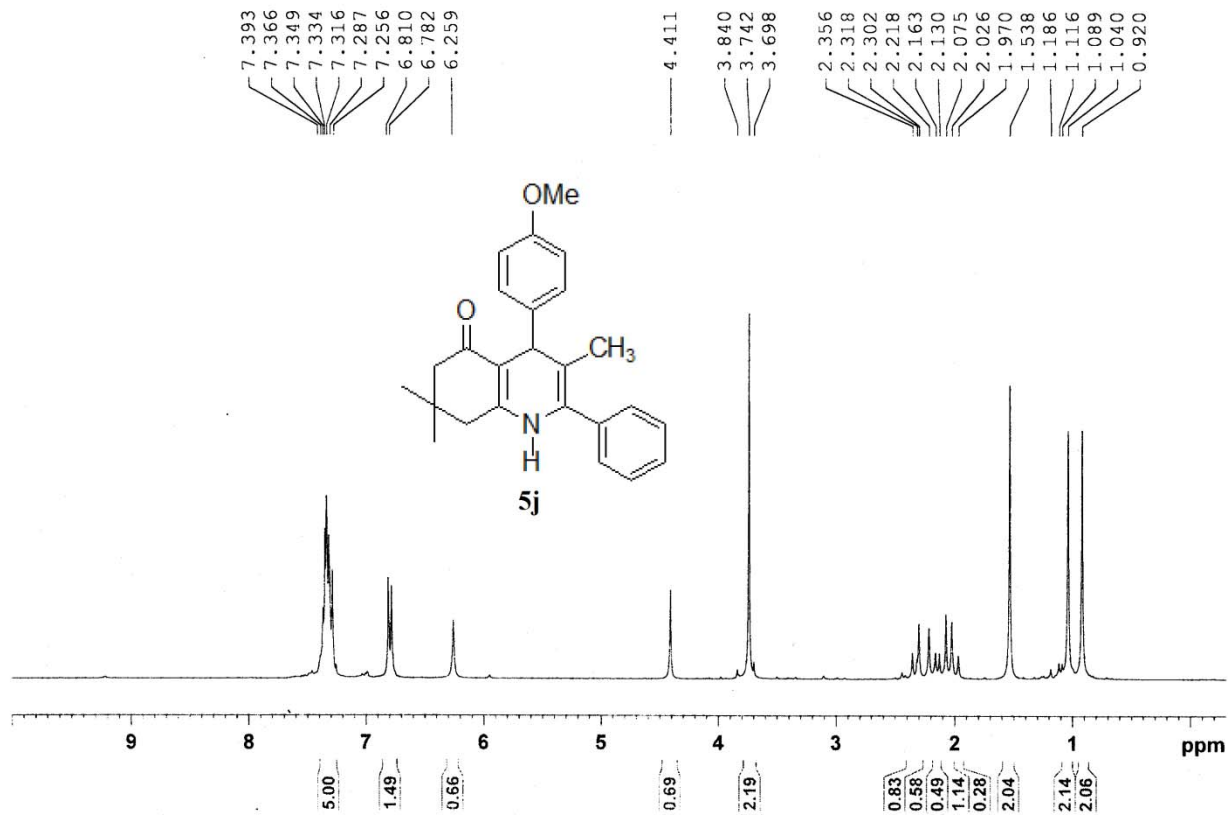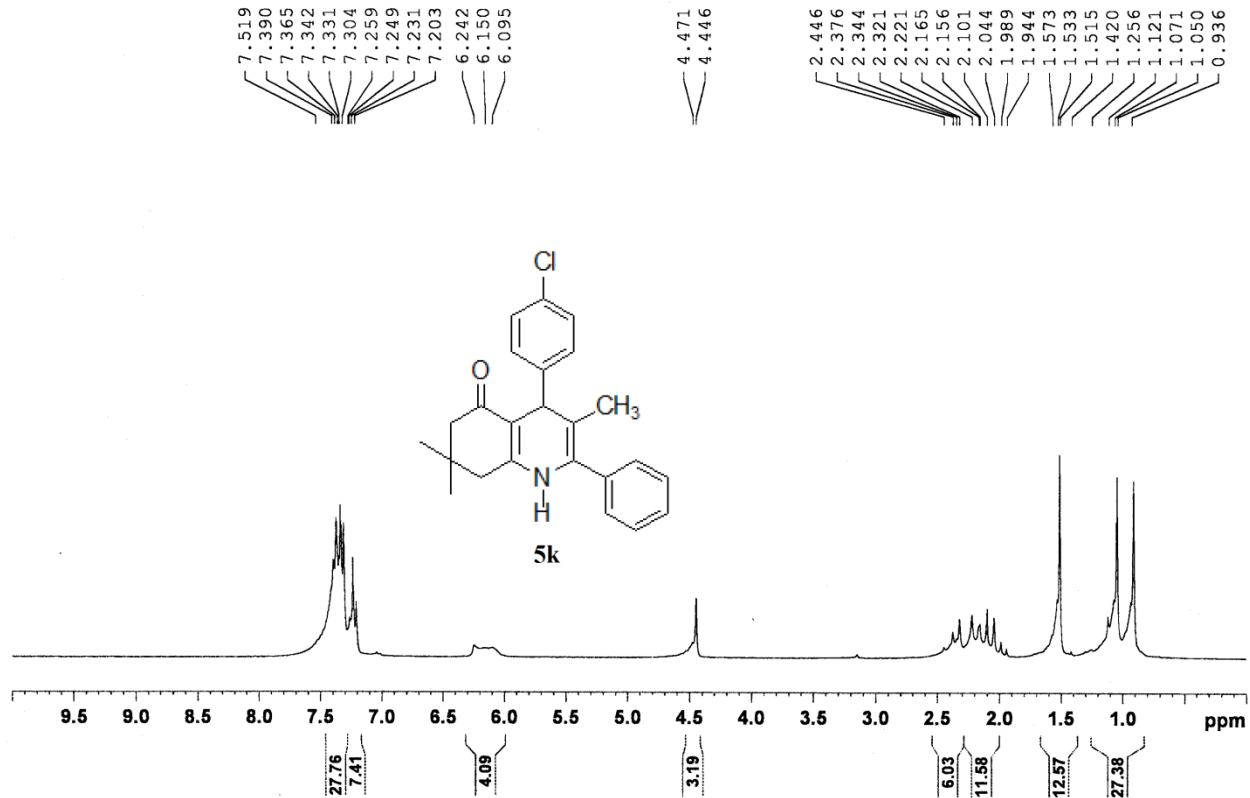

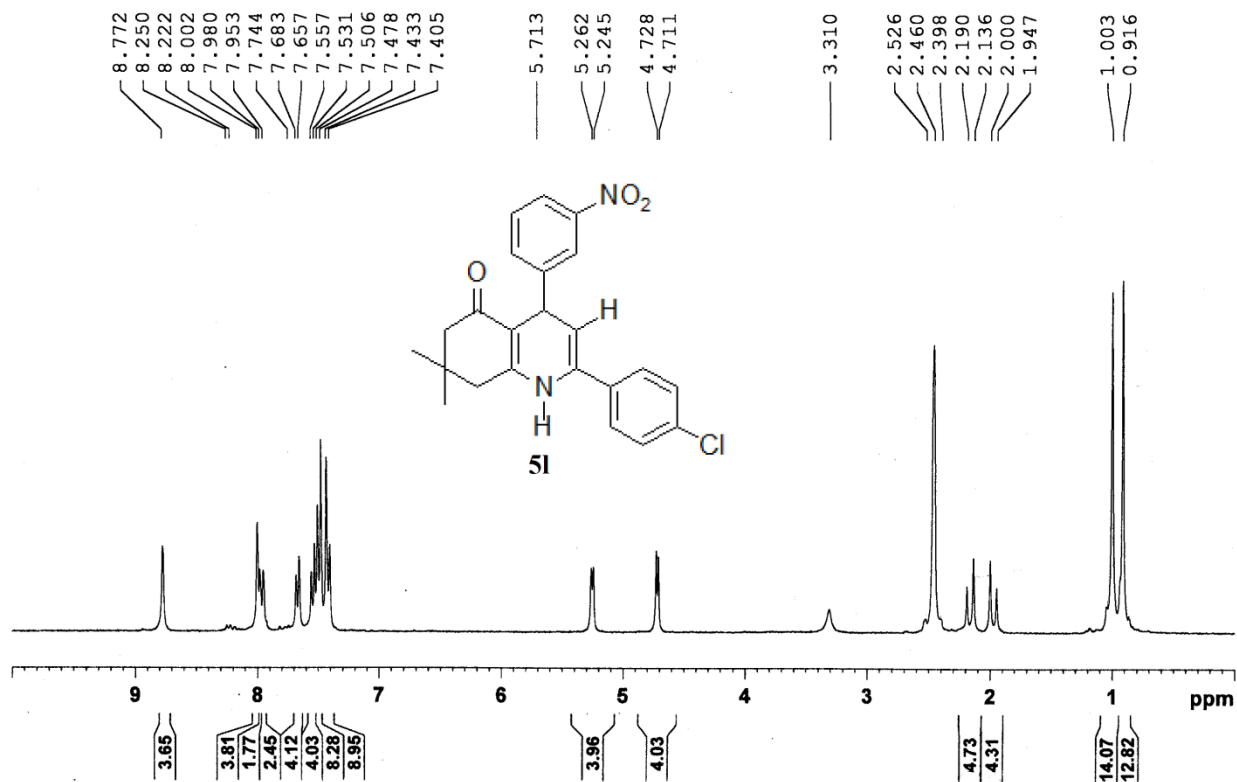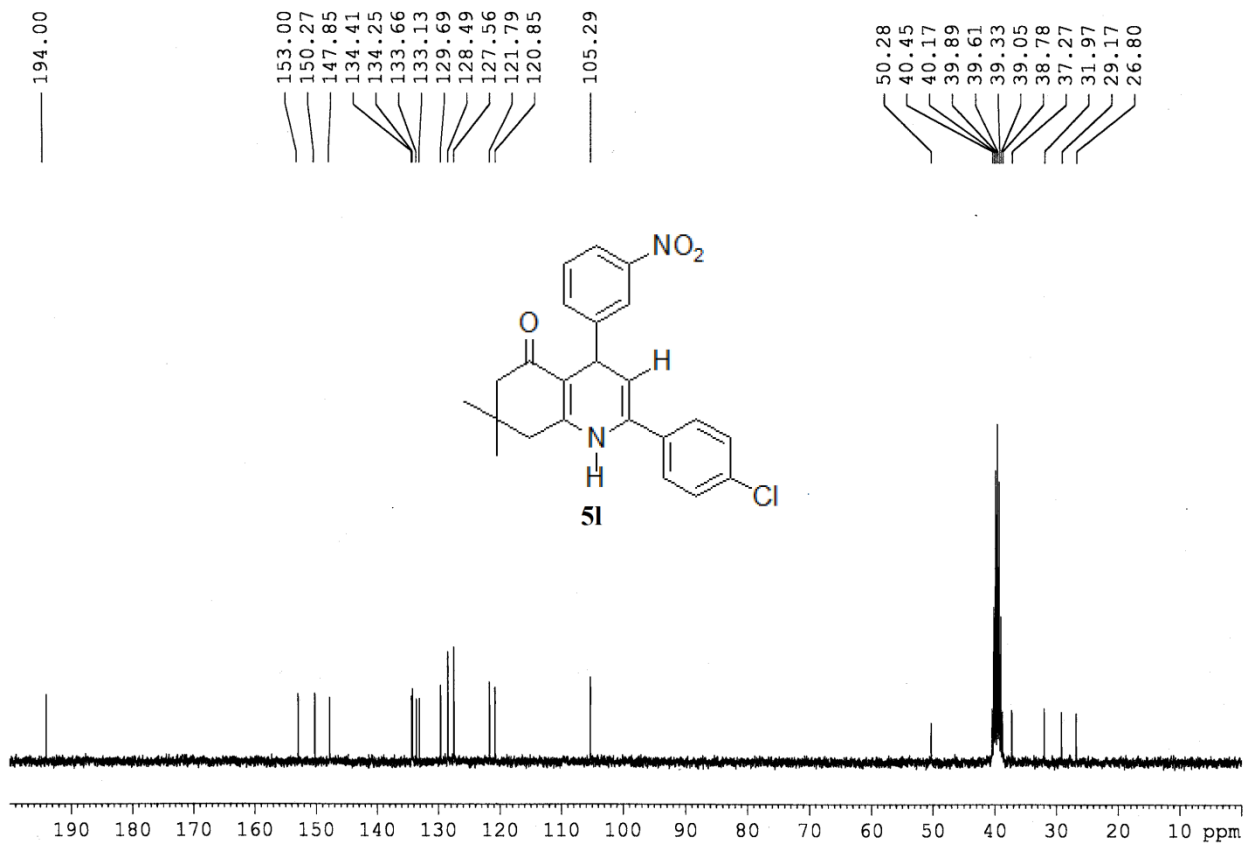

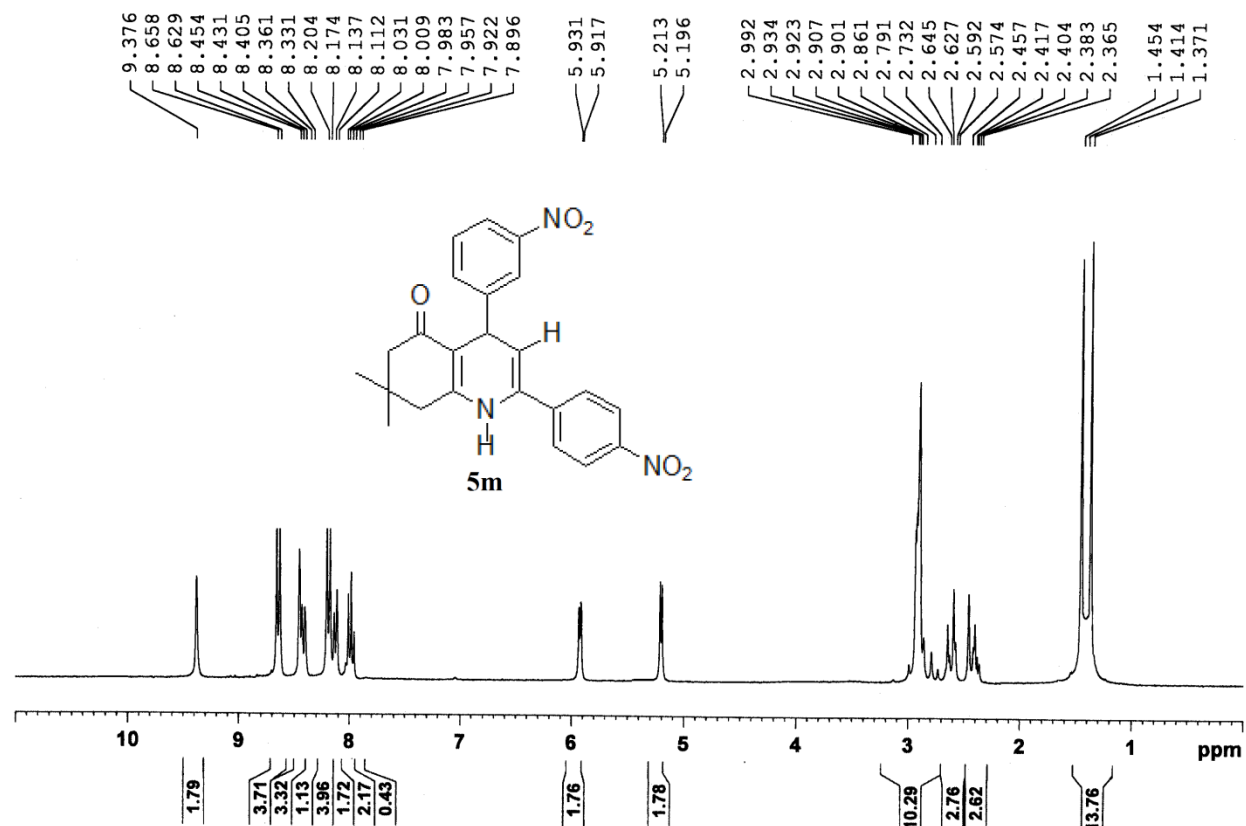

C13DEPTQ135-C

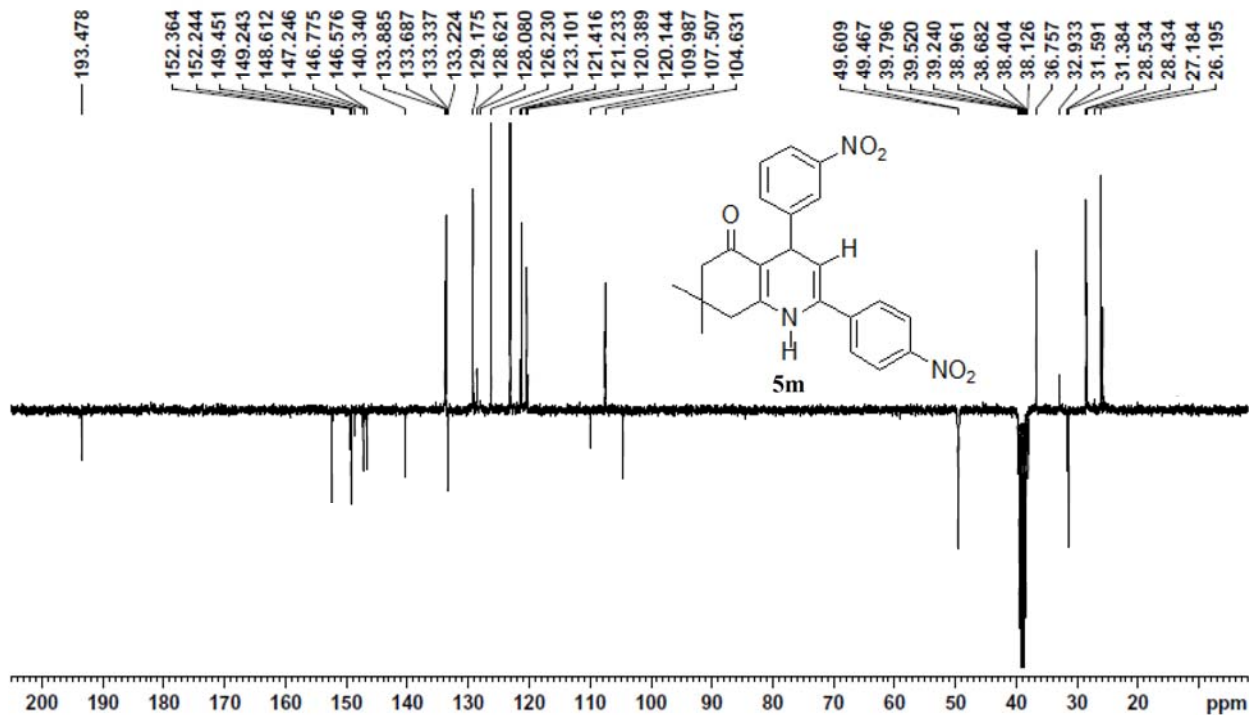

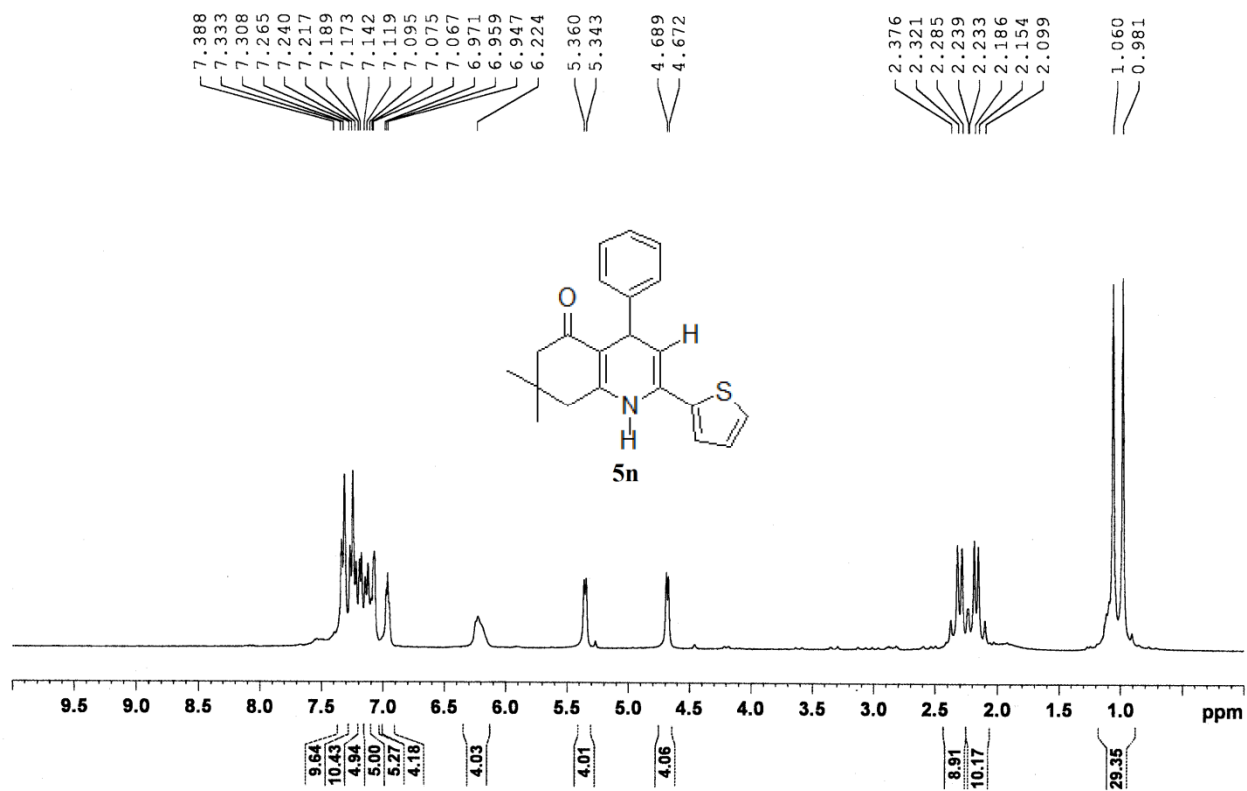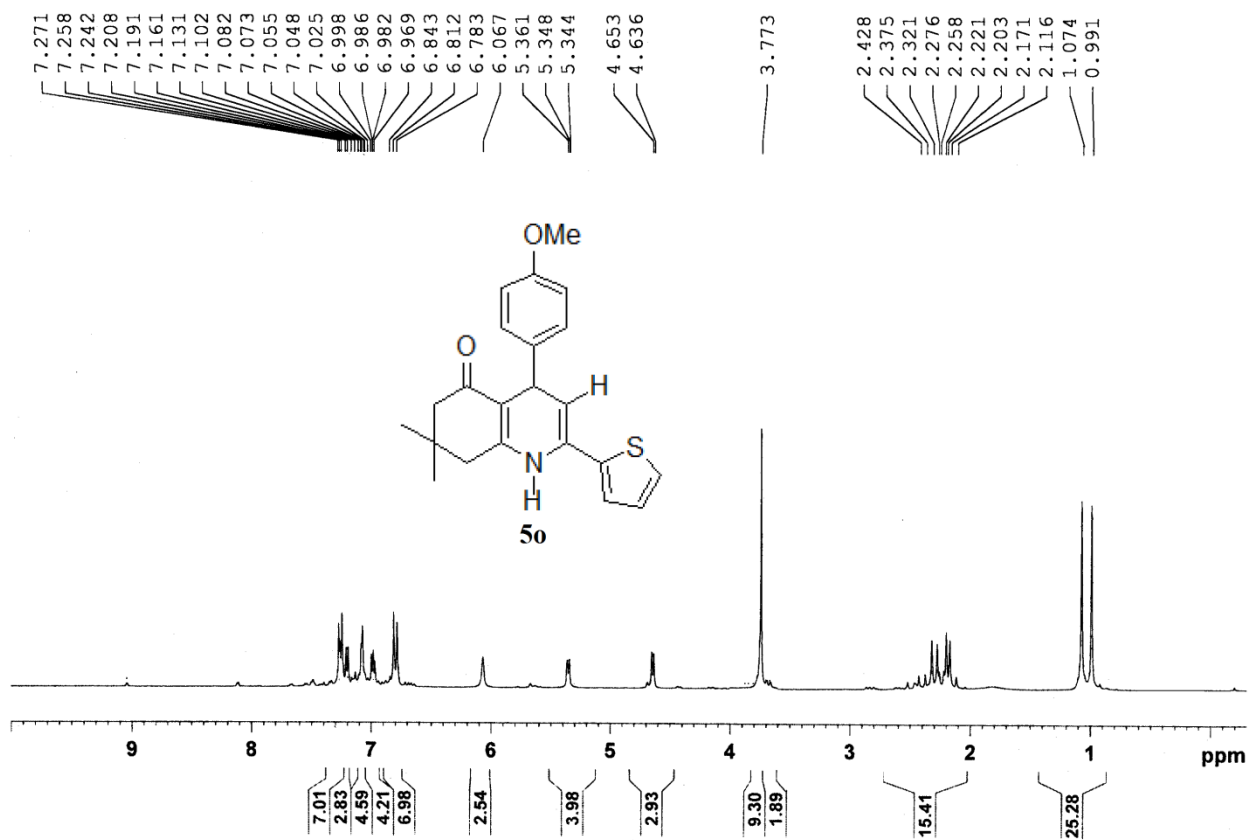

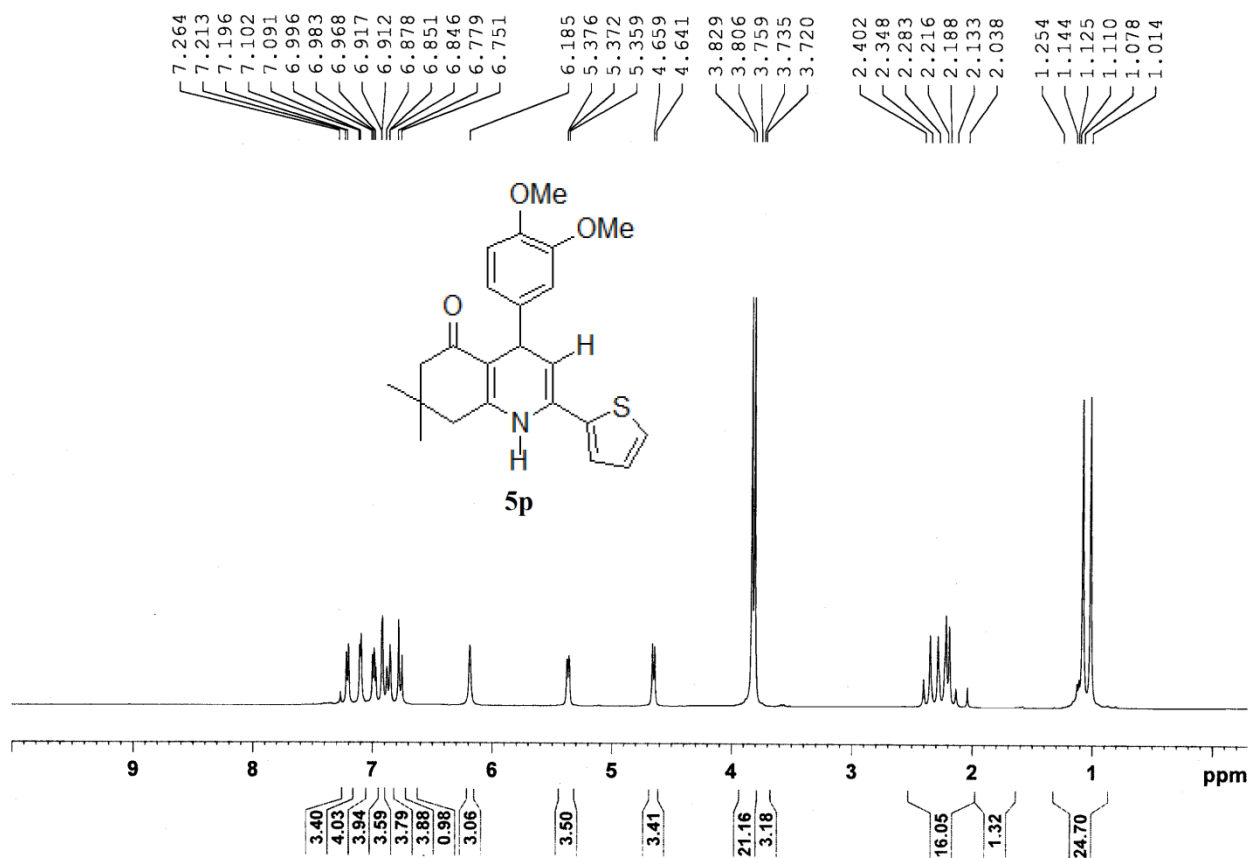

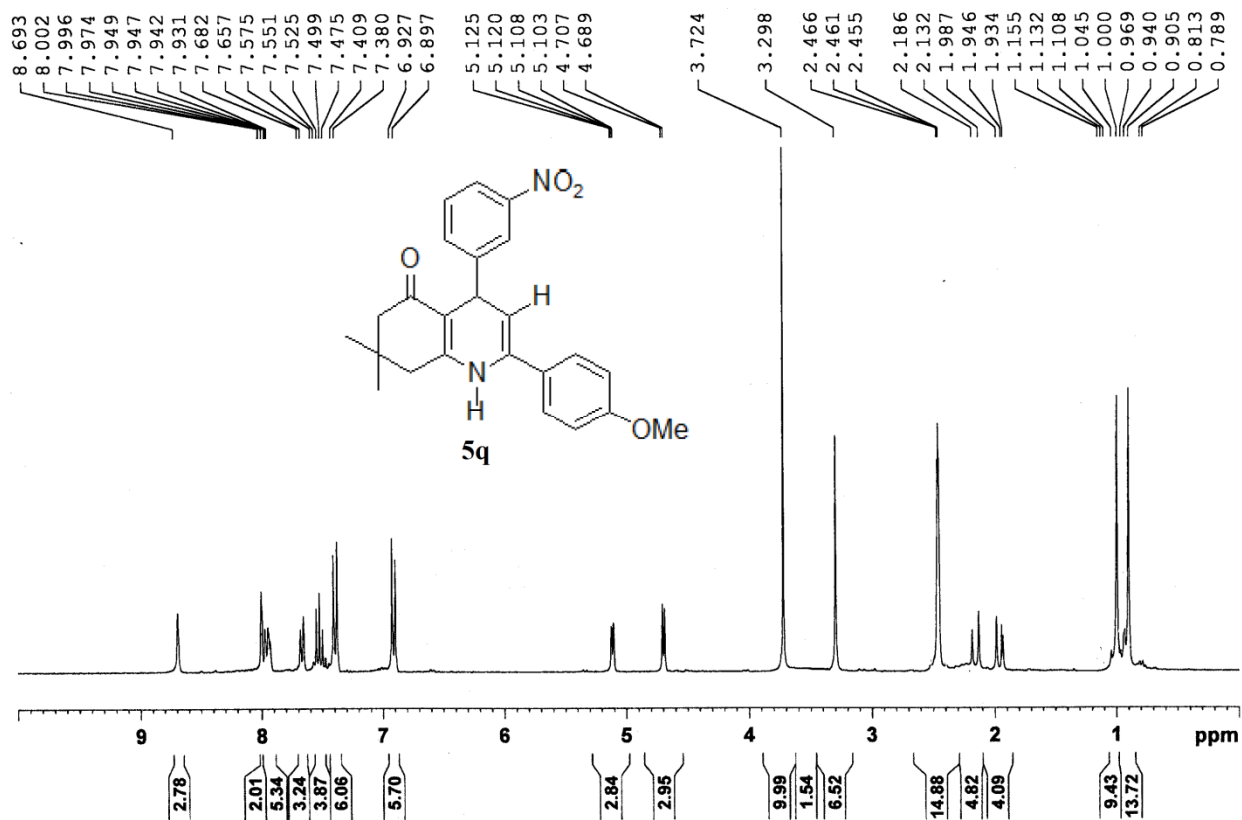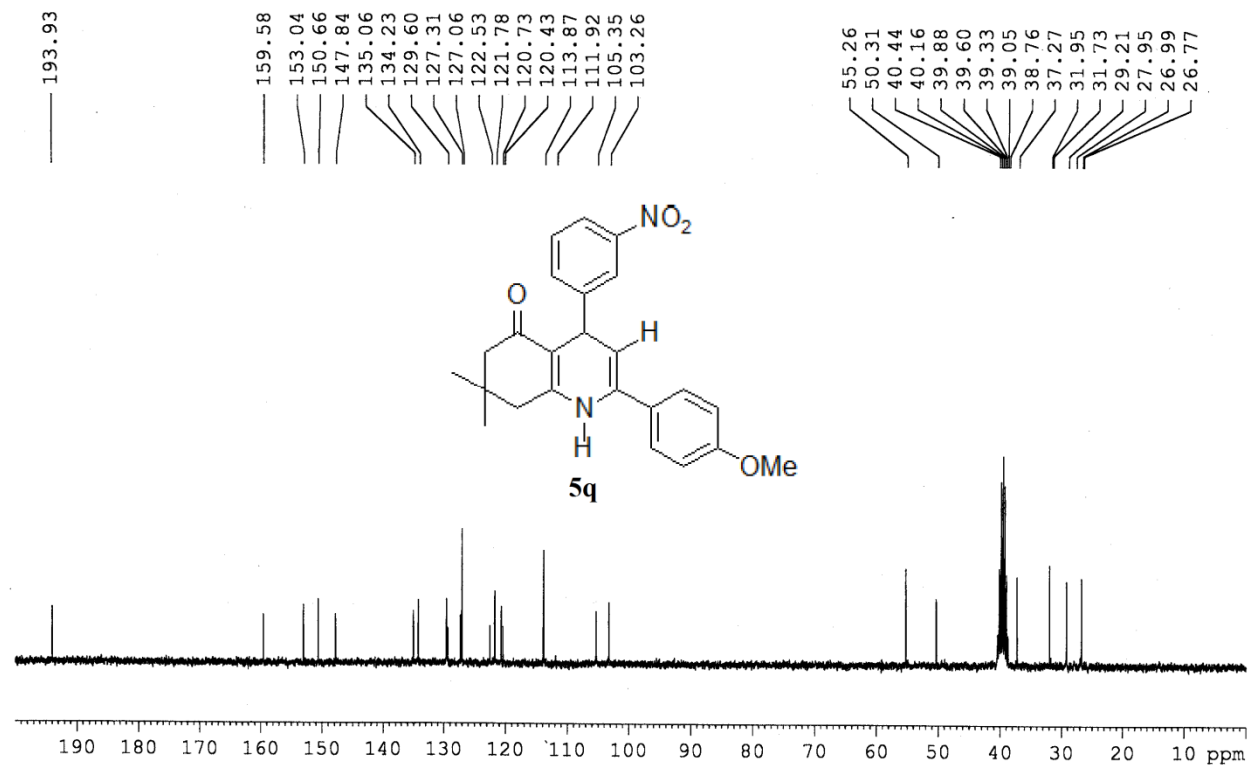

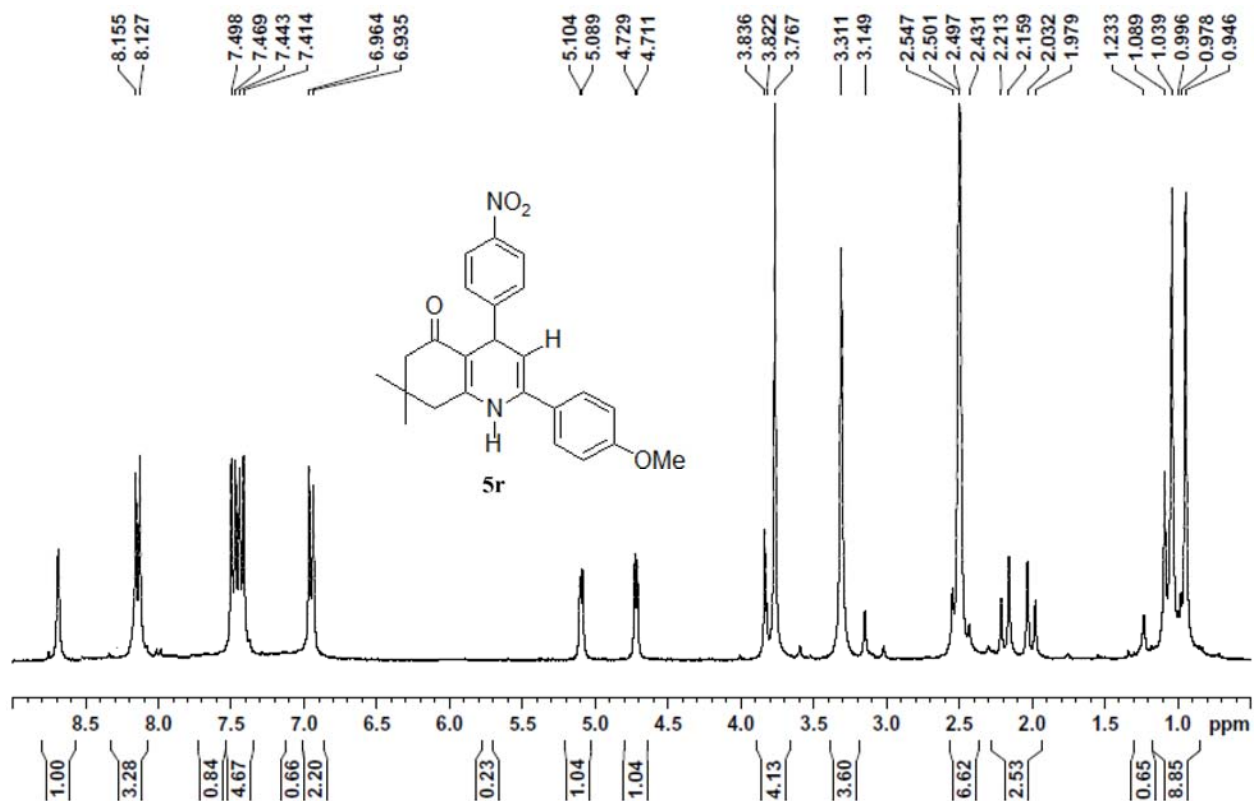

C13DEPTQ135-C

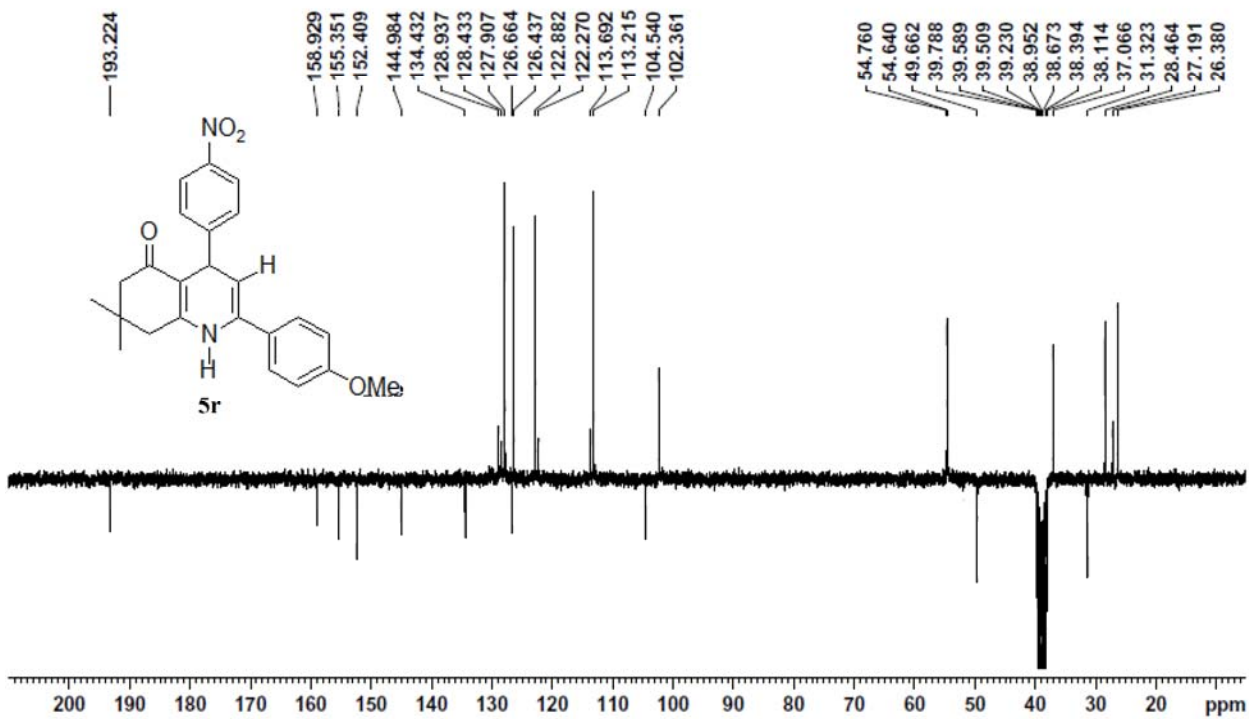

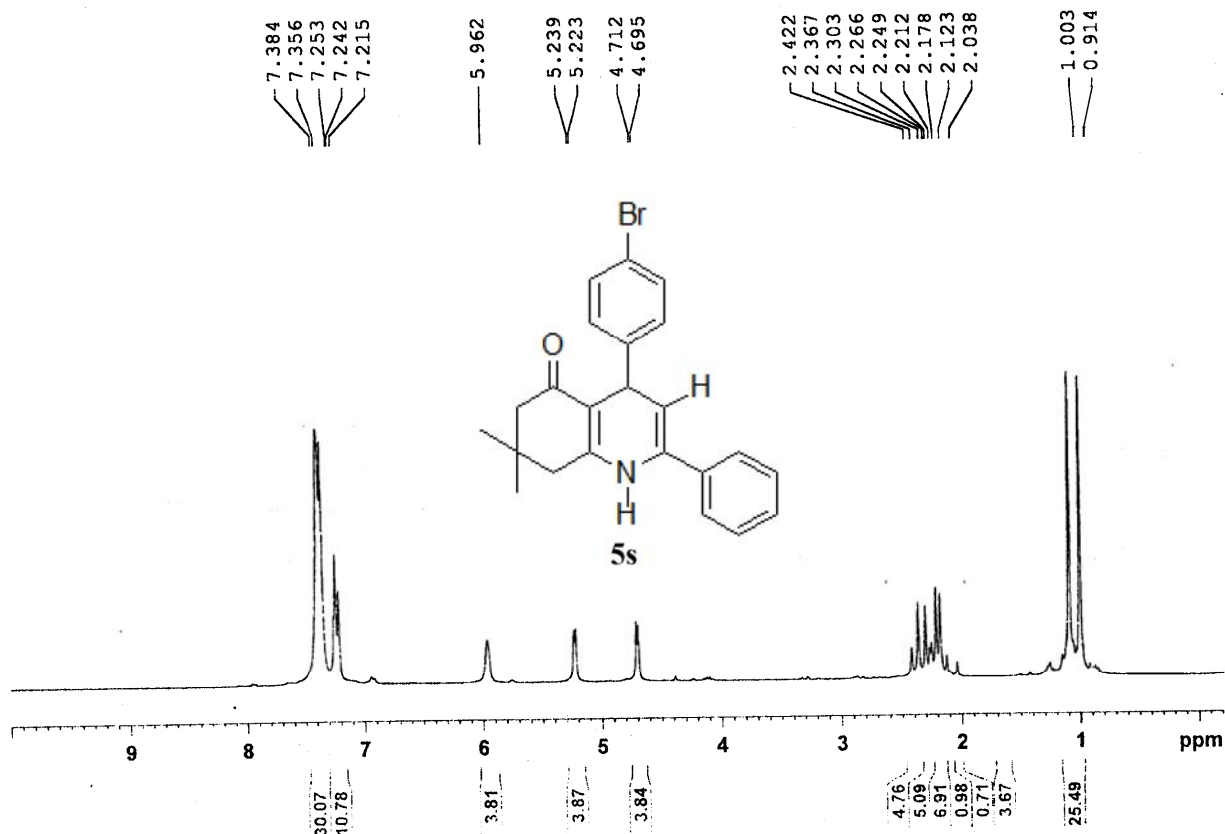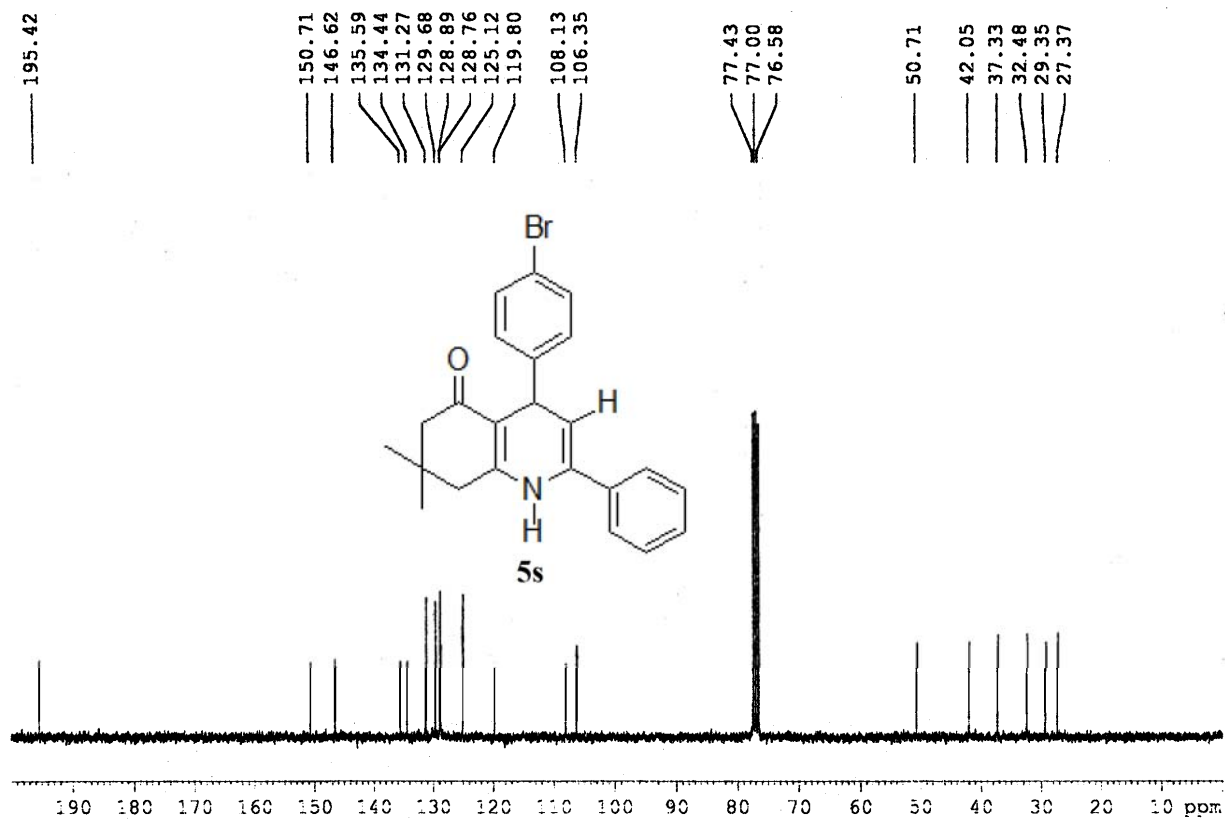



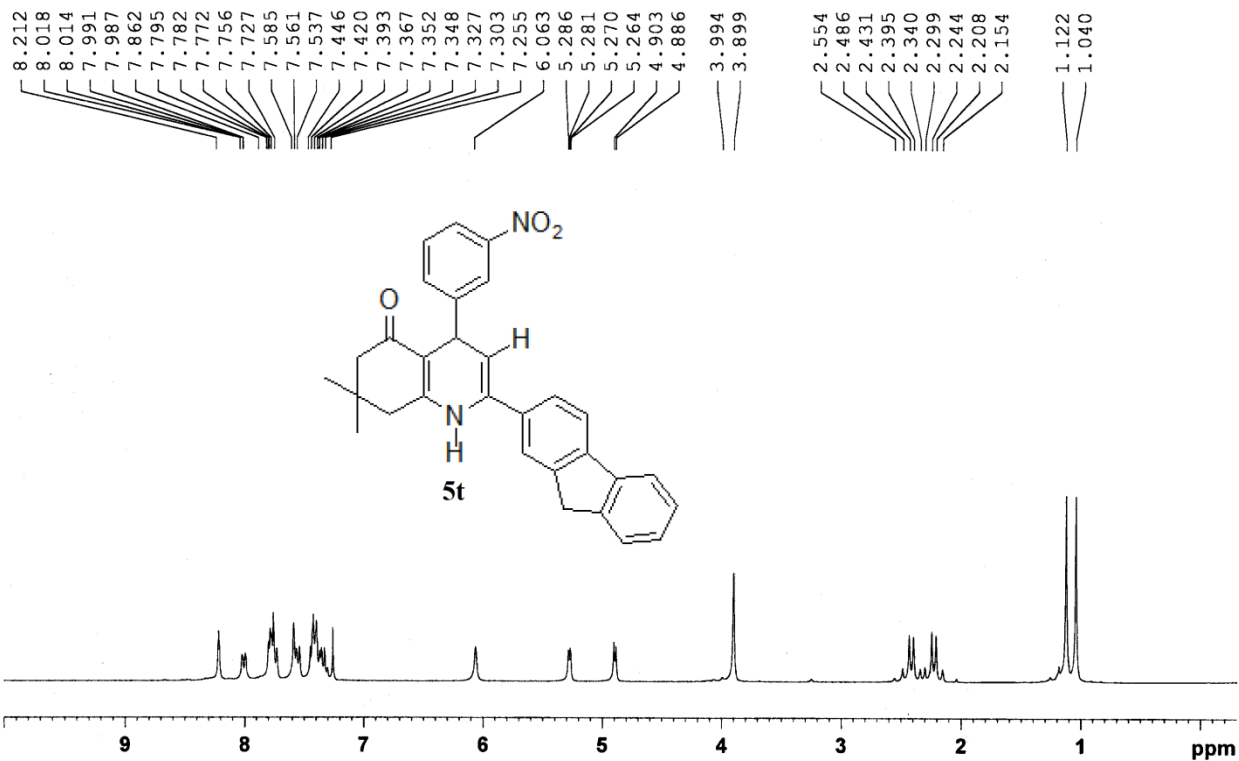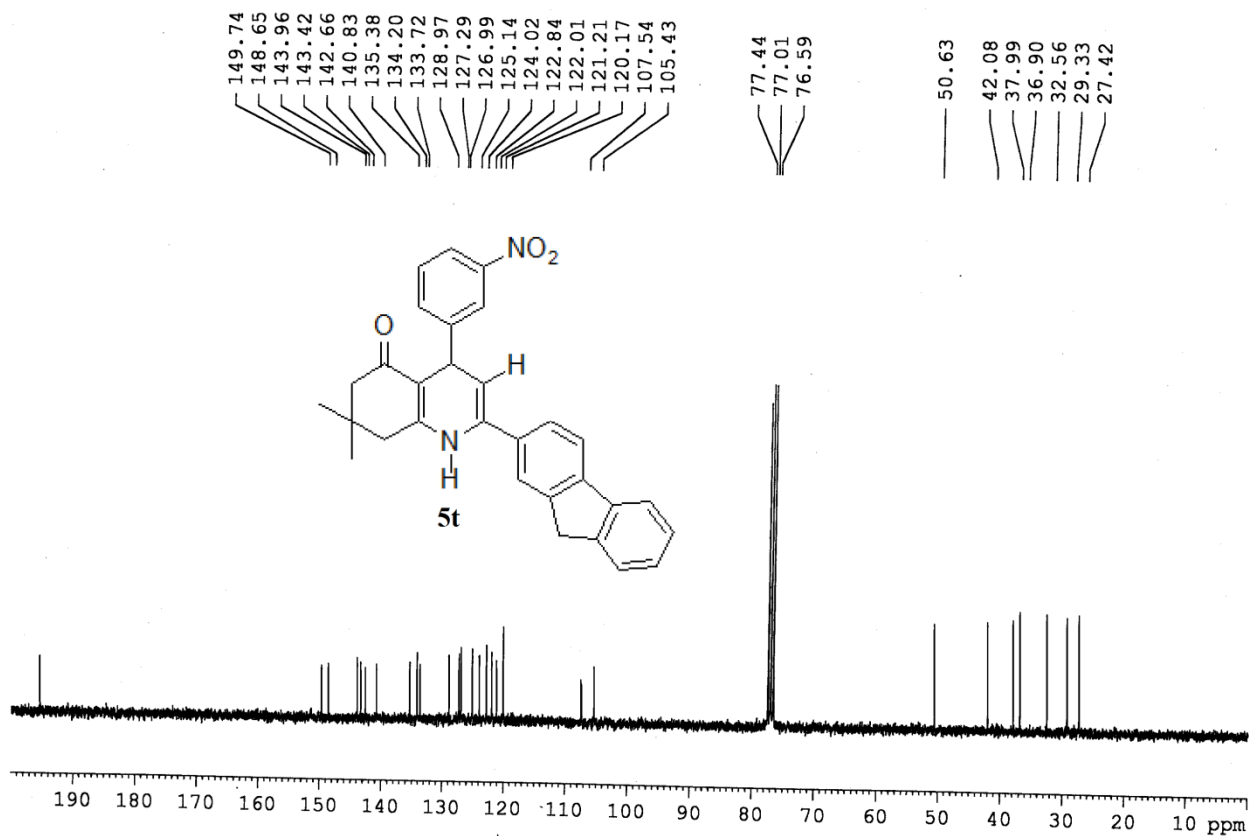

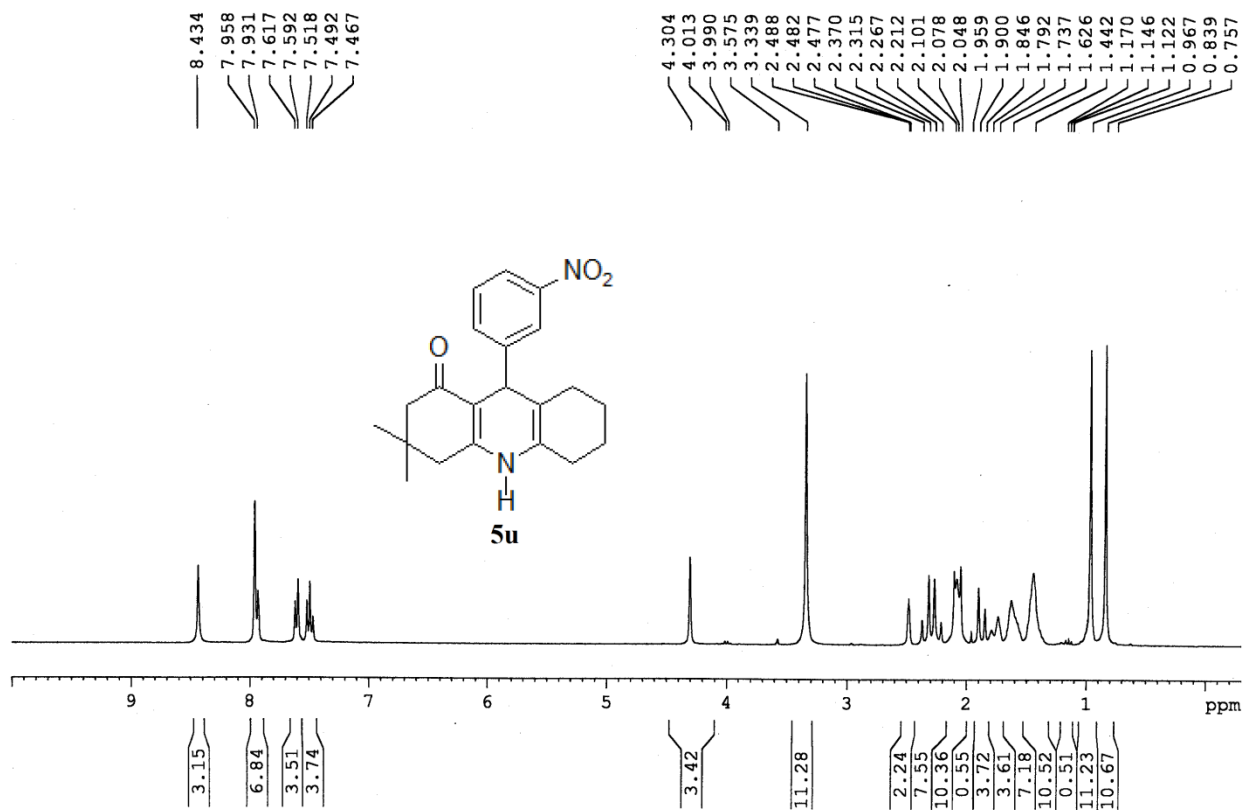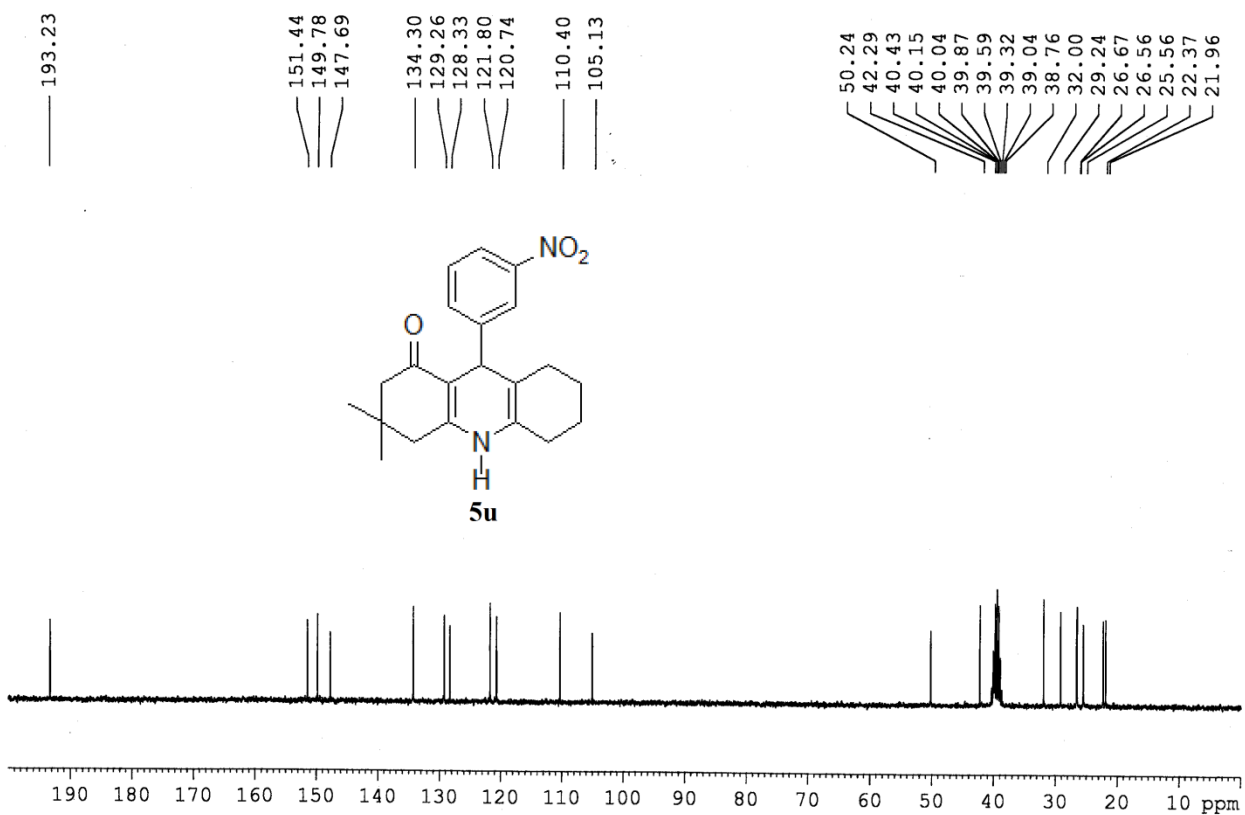

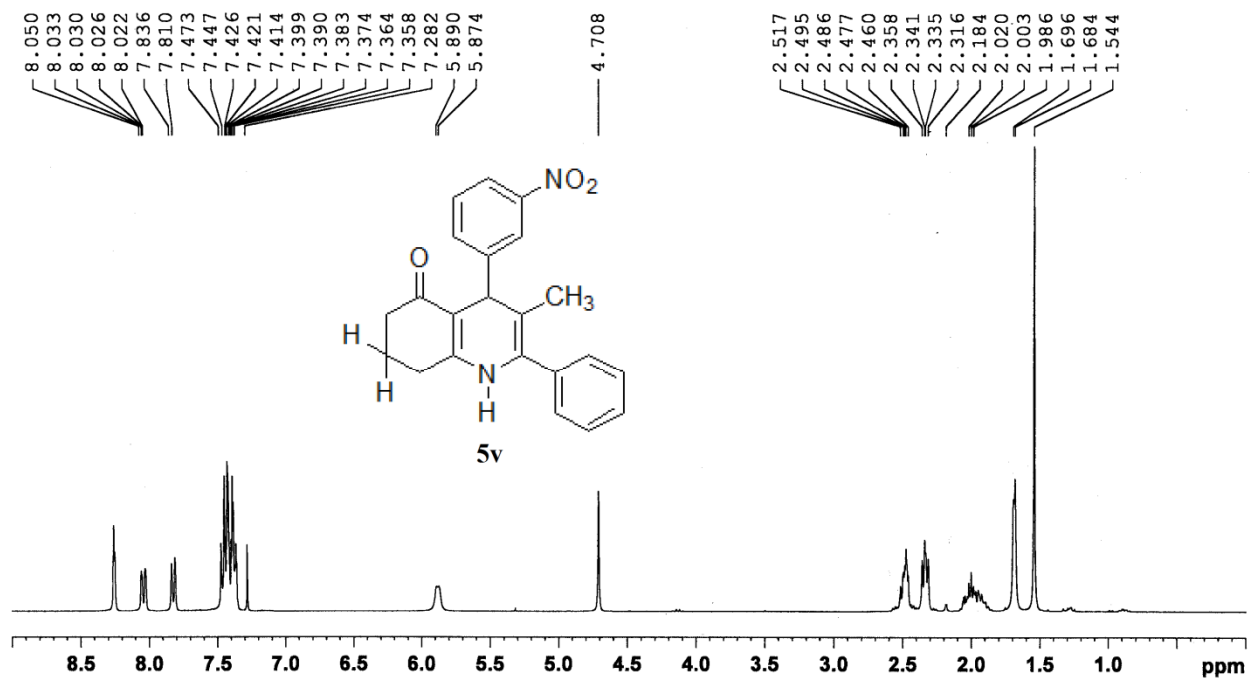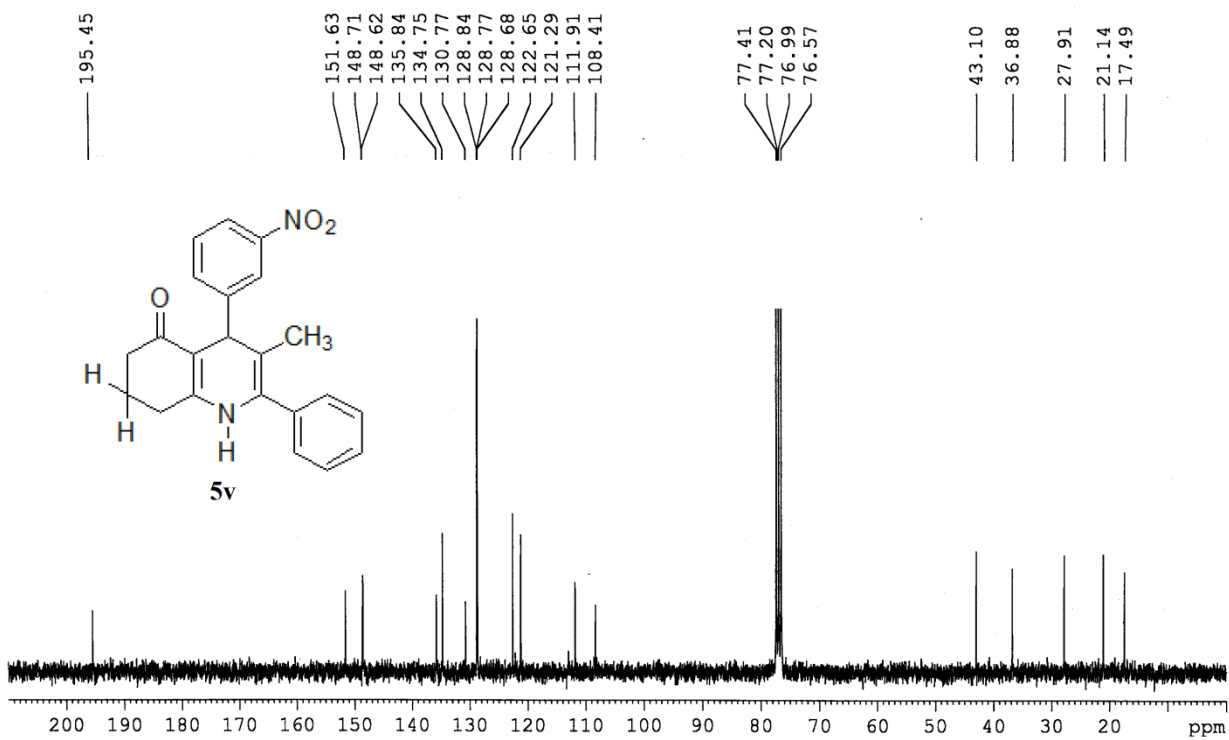

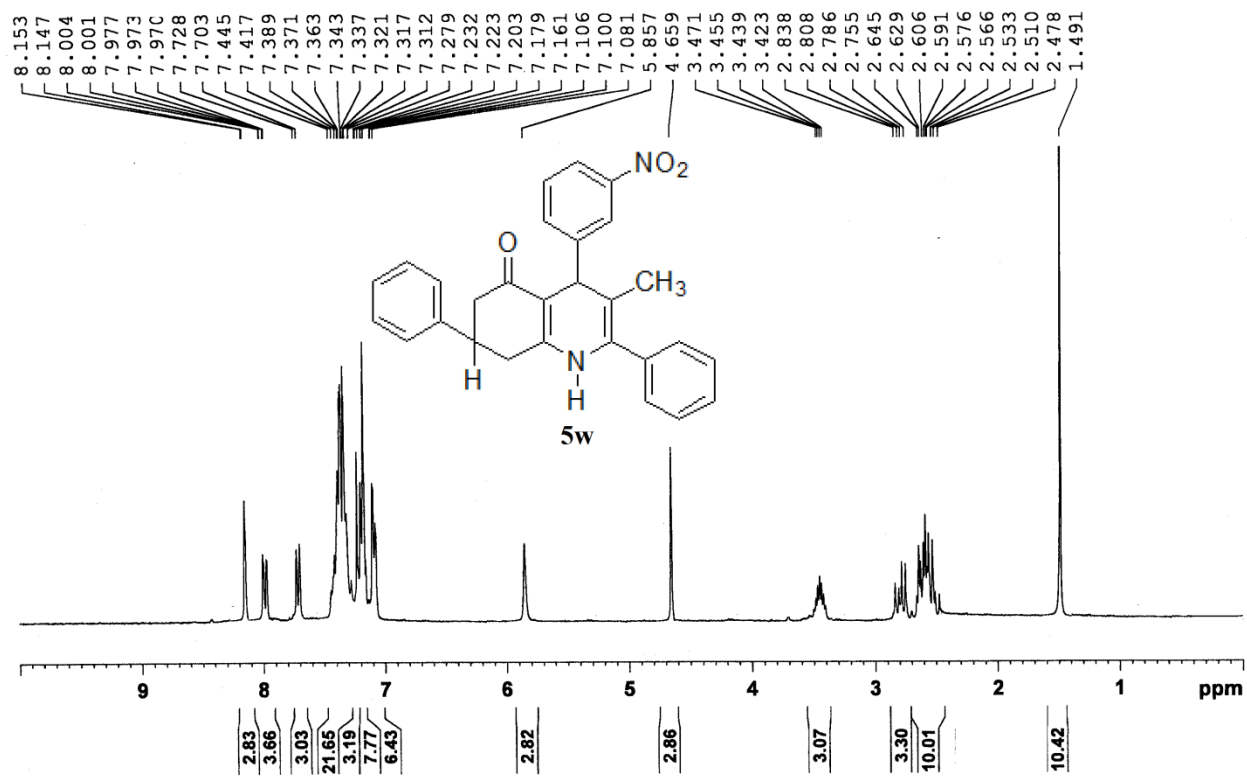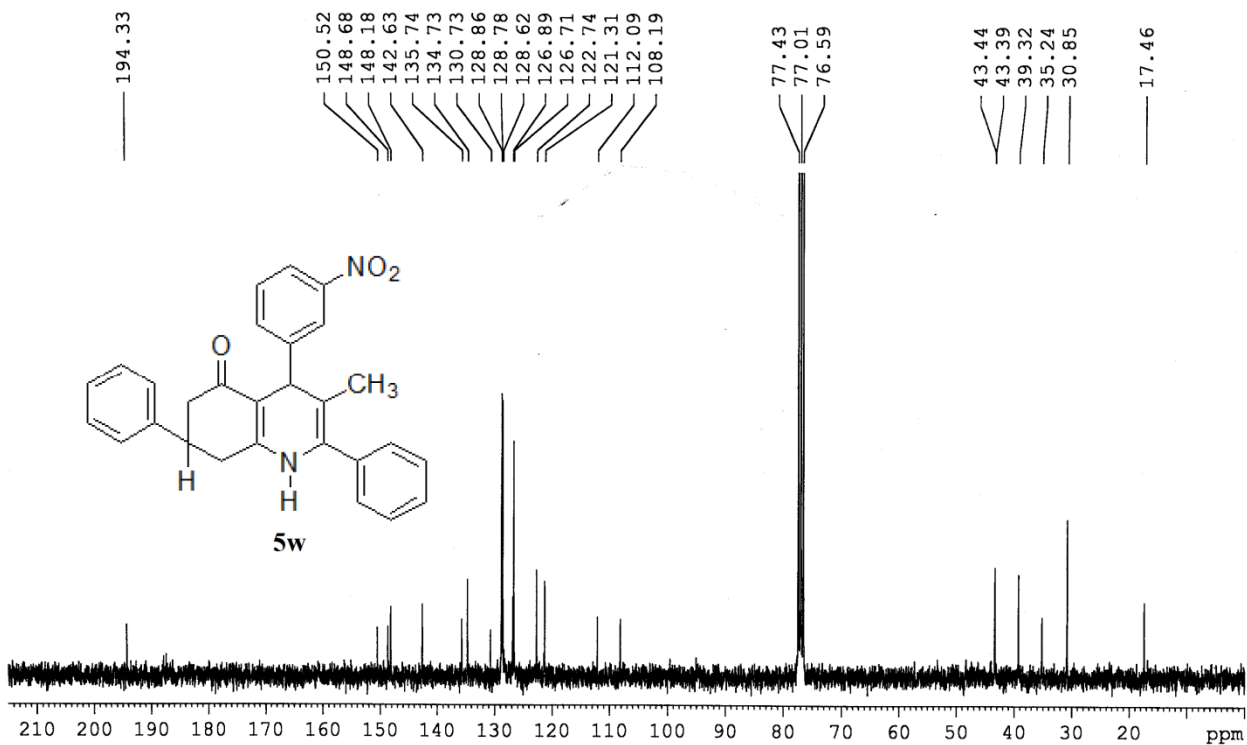

### Preparation of MCM-41 supported $\text{HPF}_6$ catalyst

MCM-41 was synthesized according to the literature method<sup>1</sup> by the hydrolysis of the structure directing agent CTAB (cetyltrimethylammonium bromide) and tetraethyl orthosilicate (TEOS), in basic solution with a molar composition of the reactants 1.0 CTAB:7.5 TEOS:1.8 NaOH:500  $\text{H}_2\text{O}$ . The gelatinous mixture was then hydrothermally treated at 110 °C for 60 h in a Teflon lined autoclave. After cooling to room temperature the resultant solid was recovered by filtration, washed with deionized water and dried in air. The collected product was calcined at 823 K for 8 h to remove the occluded polymeric surfactants. 2.0 g of the as prepared MCM-41 was dispersed in water (10 mL) in a round bottom flask. 10 mmol of  $\text{HPF}_6$  was added to the mixture through a constant-pressure dropping funnel under stirring over a period of 30 min at room temperature. After the addition was completed, the mixture was stirred for another 24 h at room temperature. The white solid was collected by filtration. The residue was thoroughly washed with water (10 times) and acetone (5 times). The obtained solid was then dried in vacuum at 80 °C for 2h and kept in vacuum desiccators. A white precipitate was obtained on treatment of barium chloride solution with the aqueous extract of the solid after first washing. This precipitate was soluble in excess hydrochloric acid. This proved the presence of  $\text{F}^-$  in the first washing. However no such precipitate was obtained on same treatment with the aqueous extract of the solid after washing it ten times with distilled water. The aforesaid observation conclusively proved the absence of  $\text{F}^-$  on the solid catalyst after thorough washing with distilled water.

### Reference

1 S. Bhunia, R. Sen, S. Koner, *Inorganica Chimica Acta*, 2010, **363**, 3993.
